# Supplementary material for: Uncovering potential targets for antibody-drug conjugates in the treatment of gynecologic malignancies
Source: Front Pharmacol. 2025 Feb 19;16:1525733. doi: 10.3389/fphar.2025.1525733 (PMC11880013; doi:10.3389/fphar.2025.1525733)
Supplement: Supplementary file 1 [file Table2.xlsx]

## Sheet: ctg-studies 2024-06-12完善
NCT Number	ADC durg	Targt	Study Title	Study URL	Acronym	Study Status	Brief Summary	Study Results	Conditions	Interventions	Primary Outcome Measures	Secondary Outcome Measures	Other Outcome Measures	Sponsor	Collaborators合作方	Sex	Age	Phases	Enrollment	Funder Type	Study Type	Study Design	Other IDs	Start Date	Primary Completion Date	Completion Date	First Posted	Results First Posted	Last Update Posted	Locations	Study Documents
NCT06263543	Sacituzumab Govitecan	TROP2	Sequencing Antibody Drug Conjugates in ER+/HER2 LOW MBC	https://clinicaltrials.gov/study/NCT06263543	SERIES	RECRUITING	The purpose of this research study is to see if the medication sacituzumab govitecan (SG) is effective at the currently approved dose and schedule in people who have previously received trastuzumab deruxtecan (T-DXd) for the treatment of metastatic, hormone receptor positive (HR+)/human epidermal growth factor 2 low (HER2 low) breast cancer. Although SG is approved to treat metastatic HR+/HER2 ne…	NO	Breast Cancer|Metastatic Breast Cancer|Advanced Breast Cancer|Hormone-receptor-positive Breast Cancer|Human Epidermal Growth Factor 2 Low Breast Cancer	DRUG: Sacituzumab govitecan	Overall response rate (ORR), ORR will be assessed using Response Evaluation Criteria in Solid Tumours version 1.1 (RECIST 1.1). ORR is defined as the percentage of participants who received at least one dose of SG and have achieved a complete response (CR) or partial response (PR) as assessed by the local investigator., 24 months	Clinical benefit rate (CBR), CBR will be assessed using RECIST 1.1 and is defined as the percentage of participants who received at least one dose of SG and have achieved CR, PR, or stable disease (SD) as assessed by the local investigator., 24 months|Progression-free survival (PFS), PFS is defined as the duration of time from the date of first treatment until the date of the first radiological p…		Reshma L. Mahtani, D.O.	Gilead Sciences	ALL	ADULT, OLDER_ADULT	PHASE2	75	OTHER	INTERVENTIONAL	Allocation: NA|Intervention Model: SINGLE_GROUP|Masking: NONE|Primary Purpose: TREATMENT	2023-MAH-001	2024-06-17	2024-06-26	2024-12-26	2024-02-16		2024-07-03	UCLA Jonsson Comprehensive Cancer Center, Los Angeles, California, 90404, United States|Miami Cancer Institute at Baptist Health, Inc., Miami, Florida, 33176, United States|Winship Cancer Institute at Emory University, Atlanta, Georgia, 30322, United States
NCT03316638	Lonigutamab Ugodotin	IGF1R	A Study of a New Investigational Medicinal Product to Treat Patients With Advanced or Metastatic Solid Tumors	https://clinicaltrials.gov/study/NCT03316638	Ulysse	ACTIVE_NOT_RECRUITING	W0101 combines a cytotoxic compound to a monoclonal antibody targeting a receptor commonly overexpressed in many cancers. The development of antibody-drug conjugates takes advantage of the specificity of the mAb while augmenting its ability to produce a cytotoxic effect. The expected benefits of antibody-drug conjugation are enhancement of cytotoxicity in target cells and limiting toxicities of c…	NO	Advanced or Metastatic Solid Tumors	DRUG: W0101 - Cohort A1|DRUG: W0101 - Cohort A2|DRUG: W0101 - Expansion Phase	Incidence of Specific Adverse Events, Identification of Dose-limiting toxicities, 28 days|Incidence of Specific Adverse Events, Identification of Dose-limiting toxicities, From first administration up to 63 days			Pierre Fabre Medicament		ALL	ADULT, OLDER_ADULT	PHASE1|PHASE2	316	INDUSTRY	INTERVENTIONAL	Allocation: NON_RANDOMIZED|Intervention Model: SEQUENTIAL|Masking: NONE|Primary Purpose: TREATMENT	W00101IV101	2017-11-24	2021-10-30	2024-12-30	2017-10-20		2022-12-20	IUCT, Toulouse, 31059, France|IGR, Villejuif, 94805, France|VHIO, Barcelona, 08035, Spain
NCT06014658	MBRC-101	EPHA5	Safety & PK of MBRC-101 in Advanced Refractory Solid Tumors	https://clinicaltrials.gov/study/NCT06014658		RECRUITING	This is a first-in-human (FIH), open label Phase 1/1b study in patients with advanced metastatic solid tumors refractory to standard treatment. Phase 1 will identify potential optimal biologically relevant doses (OBRD) and the maximum tolerated dose (MTD) of MBRC-101 at one 1 or more dosing regimens. Phase 1b will evaluate the safety and preliminary clinical activity of MBRC-101 at potential OBRD…	NO	Cancer	DRUG: Antibody-Drug Conjugate	Occurrence of treatment-emergent adverse events (TEAEs), TEAEs will be graded according to National Cancer Institute Common Terminology Criteria for Adverse Events (NCI CTCAE) v.5.0., Up to 24 Months|Occurrence of dose limiting toxicities (DLTs) during the DLT evaluation period, The DLTs are specific adverse events and are defined as any of the following: high grade non-hematologic toxicity, or h…	Objective Response Rate (ORR), ORR is defined as the percentage of participants who have a partial response (PR) or better according to the response evaluation criteria in solid tumors (RECIST) version 1.1., Up to 24 Months|Duration of Response (DOR), DOR will be calculated among responders (PR or better) from the date of initial documentation of a response (PR or better) to the date of first doc…		MBrace Therapeutics		ALL	ADULT, OLDER_ADULT	PHASE1	90	INDUSTRY	INTERVENTIONAL	Allocation: NON_RANDOMIZED|Intervention Model: SEQUENTIAL|Masking: NONE|Primary Purpose: TREATMENT	MBRC-101-001	2023-11-07	2024-07-25	2024-11-25	2023-08-28		2024-05-29	UCSF Helen Diller Family Comprehensive Cancer Center, San Francisco, California, 94158, United States|Horizon Oncology Research, Lafayette, Indiana, 47905, United States|Carolina BioOncology Institute, Huntersville, North Carolina, 28078, United States|PRISMA Health, Institute for Translational Oncology, Greenville, South Carolina, 29605, United States|NEXT Oncology, Austin, Texas, 78758, United …
NCT04146610	DP303c	ERBB2	Study of DP303c Administered Intravenously to Subjects With HER2-Positive in Advanced Solid Tumors	https://clinicaltrials.gov/study/NCT04146610		UNKNOWN	A phase Ia, multicenter, open and dose-increasing study of DP303c to evaluate the safety , pharmacokinetics, immunogenicity and antitumor activity of subjects with HER2-positive advanced solid tumors.	NO	Neoplasms	DRUG: an antibody drug conjugate	Maximal Tolerance Dose (MTD) of Dp303c, The dose level in which \>= 2 out of 6 patients have dose-limiting toxicity (DLT). The MTD is defined as the previous dose level., The first treatment cycle 21 days	Maximum concentration (Cmax) of DP303c, The pharmacokinetics(PK) profile of DP303c, approximately 2 years|Time of peak plasma concentration (Tmax), The pharmacokinetics(PK) profile of DP303c, approximately 2 years|Area under the plasma concentration time curve (AUC) of DP303c, The pharmacokinetics(PK) profile of DP303c, approximately 2 years|Overall response rate (ORR), To preliminarily evaluate …		CSPC ZhongQi Pharmaceutical Technology Co., Ltd.		ALL	ADULT, OLDER_ADULT	PHASE1	30	INDUSTRY	INTERVENTIONAL	Allocation: NA|Intervention Model: SINGLE_GROUP|Masking: NONE|Primary Purpose: TREATMENT	DP303c201801	2024-11-19	2024-06-21	2024-06-21	2019-10-31		2019-10-31	Fudan University Cancer Hospital, Shanghai, China
NCT01439152	Anetumab ravtansine	Mesothelin	Phase I Study to Determine the Maximum Tolerable Dose of BAY94-9343 in Patients With Advanced Solid Tumors.	https://clinicaltrials.gov/study/NCT01439152		COMPLETED	BAY94-9343 was an antibody-drug conjugate (ADC) directed against the cancer antigen mesothelin on tumor cells.	NO	Oncology	DRUG: BAY94-9343|DRUG: BAY94-9343 (Expansion)|DRUG: BAY94-9343 (1.8 mg/kg)|DRUG: BAY94-9343 (2.2 mg/kg)	Incidence of DLT (dose limiting toxicity) of BAY 94-9343, At the end of Cycle 1 Day21|Determination of the Pharmacokinetic profile of BAY94-9343 and its metabolites (ADC, Total Antibody, DM4 and DM4-Me), Q3W Arm: Cmax, AUC (0-504), AUC (0-tlast), tmax, t1/2 and AUC (Cycle 1 only) Q3W: Cycle 1 and Cycle 3: pre-dose, 0.5, 1, 1.5, 2, 3, 5, 8, (24), 48, (96), 168, 336 and 504 hours after start of inf…	Biomarker evaluation: Plasma concentrations of soluble mesothelin and Cytokeratin 18 (CK18), C1D1: pre-dose, 24, 48, and 168h after start of infusion; C2D1: pre-dose, 4 and 168h after start of infusion; C3D1: pre-dose, 24, 48, and 168h after start of infusion; C4 and every even cycle: pre-dose until Implementation of Am 6|Tumor response: assessment of best response and PFS (progression free survi…		Bayer		ALL	ADULT, OLDER_ADULT	PHASE1	148	INDUSTRY	INTERVENTIONAL	Allocation: NON_RANDOMIZED|Intervention Model: PARALLEL|Masking: NONE|Primary Purpose: TREATMENT	15051	2011-09-07	2016-12-31	2019-07-30	2011-09-23		2021-07-09	New Haven, Connecticut, 06520-8063, United States|Chicago, Illinois, 60637, United States|Bethesda, Maryland, 20892, United States|Detroit, Michigan, 48201, United States|Oklahoma City, Oklahoma, 73104, United States|Nashville, Tennessee, 37203, United States|Dallas, Texas, 75251, United States|Houston, Texas, 77030, United States
NCT06328387	T-DXd/SG+HCQ	ERBB2;TROP2	HCQ+ADC vs ADC in the Treatment of Advanced Breast Cancer	https://clinicaltrials.gov/study/NCT06328387		RECRUITING	Advanced breast cancer is a special subtype of human breast cancer. Conventional guidelines recommend chemotherapy combined with other adjuvant therapies for this subtype of patients. However, the choice of treatment for these patients after treatment progress is a research hotspot in this field. Trastuzumab Deruxtecan (T-DXd) and Sacituzumab Govitecan (SG) are new ADC drugs targeting HER2 or TRO…	NO	Advanced Breast Cancer|Metastatic Breast Cancer	DRUG: Hydroxychloroquine|DRUG: Sacituzumab Govitecan|DRUG: Trastuzumab Deruxtecan	Dose Limiting Toxicity, DLT, A dose limiting toxicity（DLT）is defined as any of the following-related adverse event(AE) that occurs during the DLT period, graded according to the NCI Common Terminology Criteria for Adverse Events(CTCAE), Version 5.0, 3 weeks|Adverse event, AE, Any untoward medical occurrence in a patient or clinical investigation subject administered a pharmaceutical product and w…	Progression-Free Survival, PFS, The time from the beginning of treatment to the progression or death of the patient, 2 years|Overall Survival, OS, The time from the start of randomization to death due to any cause., 4 years|Clinical Benefit Rate, CBR, Proportion of confirmed complete response, partial response, or stable disease ≥ 24 weeks., 24 weeks after enrollment|Disease Control Rate, DCR, Pr…		Sun Yat-Sen Memorial Hospital of Sun Yat-Sen University		FEMALE	ADULT, OLDER_ADULT	PHASE1|PHASE2	120	OTHER	INTERVENTIONAL	Allocation: NON_RANDOMIZED|Intervention Model: PARALLEL|Masking: NONE|Primary Purpose: TREATMENT	SYSKY-2024-064-03	2024-01-29	2026-02-01	2026-03-01	2024-03-25		2024-03-25	Sun Yat-sen Memorial Hospital, Sun Yat-sen University, Guangzhou, Guangdong, 510120, China
NCT06311214	sacituzumab govitecan、enfortumab vedotin、trastuzumab deruxtecan	TROP2、Nectin-4、ERBB2	Personalized Antibody-Drug Conjugate Therapy Based on RNA and Protein Testing for the Treatment of Advanced or Metastatic Solid Tumors (The ADC MATCH Screening and Treatment Trial)	https://clinicaltrials.gov/study/NCT06311214		NOT_YET_RECRUITING	This phase II ADC MATCH screening and multi-sub-study treatment trial is evaluating whether biomarker-directed treatment with one of three antibody-drug conjugates (ADCs) (sacituzumab govitecan, enfortumab vedotin, and trastuzumab deruxtecan) works in treating patients with solid tumor cancers that have high expression of the Trop-2, nectin-4, or HER2 proteins and that may have spread from where …	NO	Advanced Malignant Solid Neoplasm|Metastatic Malignant Solid Neoplasm	PROCEDURE: Biopsy|PROCEDURE: Biospecimen Collection|PROCEDURE: Computed Tomography|PROCEDURE: Echocardiography|OTHER: Electronic Health Record Review|DRUG: Enfortumab Vedotin|OTHER: Immunohistochemistry Staining Method|PROCEDURE: Magnetic Resonance Imaging|PROCEDURE: Multigated Acquisition Scan|BIOLOGICAL: Sacituzumab Govitecan|BIOLOGICAL: Trastuzumab Deruxtecan	Frequency of high protein expression in patients with high ribonucleic acid (RNA) expression of each antibody-drug conjugate target (screening protocol), Up to completion of screening period|Objective response rate (treatment cohorts), Will be defined as the proportion of patients who achieve complete response or partial response per the Response Evaluation Criteria in Solid Tumors version 1.1. F…	Frequency that patients with high RNA and immunohistochemistry target expression receive cohort treatment on study (screening protocol), Up to 3 years|Progression free survival (treatment cohorts), Will be estimated using the Kaplan-Meier method. For each treatment cohort, 90% two-sided confidence intervals will be calculated for the proportion of patients alive and progression free at 6 months f…	Mechanisms of acquired resistance (treatment cohorts), Up to 3 years	National Cancer Institute (NCI)		ALL	ADULT, OLDER_ADULT	PHASE2	500	NIH	INTERVENTIONAL	Allocation: NON_RANDOMIZED|Intervention Model: SEQUENTIAL|Masking: NONE|Primary Purpose: TREATMENT	NCI-2024-01903|NCI-2024-01903|10397|10397|UM1CA186688	2024-06-21	2024-10-31	2024-10-31	2024-03-15		2024-06-05
NCT05824325	SHR-A1811	ERBB2	Different Targeted Antibody-drug Conjugates For HER2 Ultra-low or No Expression Advanced Breast Cancer（GALAXY）	https://clinicaltrials.gov/study/NCT05824325		ACTIVE_NOT_RECRUITING	This is a phaseⅠb/Ⅱ, open-label, two-arm parallel study evaluating the efficacy and safety of different targeted antibody-drug conjugates for HER2 ultra-low or no expression advanced breast cancer	NO	Breast Cancer	DRUG: SHR-A1811|DRUG: TROP2 ADC	Occurrence of adverse events (AEs)- Phase 1, Occurrence of AEs in Phase 1 graded according to CTCAE v5.0, Up to follow-up period, approximately 24 months|Objective Response Rate (ORR)- Phase 2, The proportion of patients who have a CR or PR, as determined by the Investigator at local site per RECIST 1.1., Until progression, assessed up to approximately 24 months	Progression Free Survival (PFS, Time to progression as assessed by the Investigator at local site per RECIST 1.1, or death due to any cause., Until progression, assessed up to approximately 24 months|Overall Survival (OS), time to death due to any cause, Until death, assessed up to approximately 24 months|Duration of Response (DoR), Time from the date of first documented response until the date o…		Fudan University		FEMALE	ADULT, OLDER_ADULT	PHASE1|PHASE2	56	OTHER	INTERVENTIONAL	Allocation: NON_RANDOMIZED|Intervention Model: PARALLEL|Masking: NONE|Primary Purpose: TREATMENT	GALAXY	2023-03-14	2025-04-10	2026-10-10	2023-04-21		2023-06-27	Fudan University Shanghai Cancer Center, Shanghai, China
NCT06041516	ADCT-701	DLK-1	Antibody Drug Conjugate ADCT-701 in Neuroendocrine Tumors and Carcinomas	https://clinicaltrials.gov/study/NCT06041516		RECRUITING	Background: Neuroendocrine neoplasms (NENs) are rare cancers in the gastrointestinal tract, pancreas, lungs, adrenal glands, and other areas of the body. Many of these cancers have a high risk of relapse and a low chance of survival. Better treatments are needed. Objective: To test a new drug, ADCT-701, in people with NENs. Eligibility: Adults aged 18 and older with NENs. Design: Participants wil…	NO	Neuroendocrine Carcinomas|Neuroendocrine Tumors|Carcinoma, Neuroendocrine|Carcinoma, Adrenocortical|Carcinoma, Adrenal Cortical	DRUG: ADCT-701	Determine the maximum tolerated dose (MTD) of ADCT-701, Number of dose-limiting toxicities (DLTs) by assessing adverse events (AE) by type and grade of toxicity., cycle 1, days 1-21	Safety of ADCT-701, Adverse Events (AE) by type and grade of toxicity, through 30 days after the last ADCT-701 infusion|Preliminary anti-tumor activity of ADCT-701, To capture response rate and durations to assess: overall response rate (ORR), duration of response (DOR), progression-free survival (PFS), and overall survival (OS), up to 5 years|PK profile of ADCT-701, Assessment of PBD-conjugated …		National Cancer Institute (NCI)		ALL	ADULT, OLDER_ADULT	PHASE1	70	NIH	INTERVENTIONAL	Allocation: NON_RANDOMIZED|Intervention Model: SINGLE_GROUP|Masking: NONE|Primary Purpose: TREATMENT	10001547|001547-C	2024-06-17	2027-10-30	2029-10-30	2023-09-18		2024-06-21	National Institutes of Health Clinical Center, Bethesda, Maryland, 20892, United States
NCT05323045	BYON3521	MET	A First-in-human Dose-escalation and Expansion Study With the Antibody-drug Conjugate BYON3521	https://clinicaltrials.gov/study/NCT05323045		ACTIVE_NOT_RECRUITING	This is the first-in-human trial with BYON3521, an antibody-drug conjugate (ADC) comprising a humanized IgG1 monoclonal antibody directed against the c-MET receptor covalently conjugated to a duocarmycin-containing linker-drug.	NO	Solid Tumor	DRUG: BYON3521	Incidence of dose-limiting toxicities, Part 1, 21 days	Objective response rate, Part 2, 21 days		Byondis B.V.		ALL	ADULT, OLDER_ADULT	PHASE1	31	INDUSTRY	INTERVENTIONAL	Allocation: NA|Intervention Model: SEQUENTIAL|Masking: NONE|Primary Purpose: TREATMENT	BYON3521.001	2022-03-21	2024-07-24	2024-07-24	2022-04-12		2024-06-07	Institut Jules Bordet, Brussels, Belgium|Istituto Europeo di Oncologia, Milan, 1070, Italy|Radboud, Nijmegen, 6500HB, Netherlands|Royal Marsden, London, SM2 5PT, United Kingdom
NCT06433609	SHR-A1811 and SHR-A1921	ERBB2	Study of ADCs Combined With Adebrelimab in HER2-negative Advanced Breast Cancer	https://clinicaltrials.gov/study/NCT06433609		NOT_YET_RECRUITING	Our study is aimed to evaluate the efficacy and safety of novel ADCs named SHR-A1811 and SHR-A1921 combined with adebrelimab in HER2-negative advanced breast cancer.	NO	Advanced Breast Cancer	DRUG: SHR-A1811|DRUG: SHR-A1921|DRUG: Adebrelimab	ORR (objective response rate) by investigator, ORR is the percentage of evaluable patients with a confirmed investigator-assessed response of CR (complete response) or PR (partial response) per RECIST v1.1., From date of randomization until the date of first documented progression or date of death from any cause, whichever came first, assessed up to 3.5 years	DCR (disease control rate) by investigator, DCR is the percentage of evaluable patients with a confirmed investigator-assessed response of CR (complete response), PR (partial response) or SD (stable disease) per RECIST v1.1., From date of randomization until the date of first documented progression or date of death from any cause, whichever came first, assessed up to 3.5 years|CBR (clinical benef…		Beijing GoBroad Hospital		FEMALE	ADULT, OLDER_ADULT	PHASE2	131	OTHER	INTERVENTIONAL	Allocation: NON_RANDOMIZED|Intervention Model: PARALLEL|Masking: NONE|Primary Purpose: TREATMENT	BJGBYY-IIT-LCYJ-2024-008|BC-MUL-IIT-ADC-SHR1316	2024-06-24	2024-07-27	2024-11-27	2024-05-30		2024-05-30	Beijing GoBroad Hospital, Beijing, Beijing, 102200, China
NCT02221505	LOP628	CD117	Phase 1 Study of LOP628 in Adult Patients With cKit-positive Solid Tumors and Acute Myeloid Leukemia	https://clinicaltrials.gov/study/NCT02221505		TERMINATED	LOP628 is an antibody-drug conjugate (ADC) consisting of an anti-cKit humanized IgG1/κ antibody conjugated to a maytansine payload via a non-cleavable linker. LOP628 provides an opportunity to target cKit overexpressing tumors.	NO	cKIT-positive Solid Tumors|AML	DRUG: LOP628	Incident rate of dose limiting toxicities (DLTs), To estimate the maximum tolerated dose/recommended dose for expansion (MTD/RDE), Month 12	Incidence of adverse events (AEs) and serious adverse events (SAE), Characterize the safety and tolerability of LOP628, 30 months|Severity of adverse events (AEs) and serious adverse events (SAEs), Characterize the safety and tolerability of LOP628, 30 months|Serum PK parameters (AUC, Cmax, Tmax, and half-life), To characterize the pharmacokinetic profile of LOP628, 30 months|Serum concentration …		Novartis Pharmaceuticals		ALL	ADULT, OLDER_ADULT	PHASE1	3	INDUSTRY	INTERVENTIONAL	Allocation: NON_RANDOMIZED|Intervention Model: SINGLE_GROUP|Masking: NONE|Primary Purpose: TREATMENT	CLOP628X2101	2024-12-14	2024-03-15	2024-03-15	2014-08-20		2016-04-05	Novartis Investigative Site, Parkville, Victoria, 3050, Australia|Novartis Investigative Site, Leuven, 3000, Belgium|Novartis Investigative Site, Leiden, 2300 RC, Netherlands|Novartis Investigative Site, Barcelona, Catalunya, 08035, Spain
NCT04202705	SYD1875	5T4	A First-in-human Dose-escalation and Expansion Study With the Antibody-drug Conjugate SYD1875	https://clinicaltrials.gov/study/NCT04202705		COMPLETED	This is the first-in-human study with SYD1875, an antibody-drug conjugate (ADC) comprising of a humanized IgG1 monoclonal antibody directed against the 5T4 oncofetal antigen covalently conjugated to a duocarmycin-based linker-drug. This study includes a dose-escalation part (Part 1) in which the maximum tolerated dose (MTD) and recommended dose for expansion (RDE) will be determined, and an expan…	NO	Solid Tumor	DRUG: SYD1875	Incidence of dose-limiting toxicities, Part 1, 21 days	Objective response rate, Part 2, 21 days		Byondis B.V.		ALL	ADULT, OLDER_ADULT	PHASE1	31	INDUSTRY	INTERVENTIONAL	Allocation: NA|Intervention Model: SEQUENTIAL|Masking: NONE|Primary Purpose: TREATMENT	SYD1875.001	2020-02-28	2022-06-22	2023-01-26	2019-12-17		2023-01-30	Institut Jules Bordet, Brussels, Belgium|Institut Bergonié, Bordeaux, France|Centre Oscar Lambret, Lille, France
NCT05941507	LCB84	TROP2	A Study to Evaluate TROP2 ADC LCB84 Single Agent and in Combination With an Anti-PD-1 Ab in Advanced Solid Tumors	https://clinicaltrials.gov/study/NCT05941507		RECRUITING	This is a first-in-human, Phase 1/2 study to evaluate LCB84, a TROP2-directed antibody-drug conjugate, alone and in combination with an anti-PD-1 Ab, in dose escalation (Phase 1) followed by dose expansion (Phase 2). The study population in dose escalation (Phase 1) consists of patients with advanced solid tumors refractory to standard of care, or for whom no standard of care exists. After the MT…	NO	Advanced Solid Tumors	DRUG: LCB84|DRUG: Anti-PD-1 monoclonal antibody	Safety of LCB84 alone and LCB84 in combination with an anti-PD-1 Ab (Phase 1 and 2), Incidence and severity of AEs and SAEs, Up to 48 months|Recommended Phase 2 Dose of LCB84 alone and LCB84 in combination with an anti-PD-1 Ab (Phase 1), Based on tolerability, preliminary anti tumor activity, and pharmacokinetics, Up to 24 months|Objective Response Rate (Phase 2), Assessed by RECIST 1.1, iRECIST,…	Plasma Concentrations of LCB84 (Phase 1 and 2), Pharmacokinetic parameters will be determined from observed concentrations of LCB84, Up to 48 months|Evaluation of the immunogenicity of LCB84 (Phase 1 and 2), Occurrence of ADA measured in serum at selected timepoints during the study, Up to 48 months|Objective Response Rate (Phase 1), Assessed by RECIST 1.1, iRECIST, and RANO-BM, Up to 24 months|D…		LigaChem Biosciences, Inc.	AntibodyChem Biosciences, Inc.	ALL	ADULT, OLDER_ADULT	PHASE1|PHASE2	300	INDUSTRY	INTERVENTIONAL	Allocation: NON_RANDOMIZED|Intervention Model: PARALLEL|Masking: NONE|Primary Purpose: TREATMENT	LCB84-1001	2023-10-05	2024-01-27	2024-05-27	2023-07-12		2024-04-19	Cedars Sinai Medical Center, Los Angeles, California, 90048, United States|Dana Farber Cancer Institute, Boston, Massachusetts, 02115, United States|University of Michigan, Ann Arbor, Michigan, 48109, United States|Mary Crowley Cancer Research, Dallas, Texas, 75230, United States|MD Anderson Cancer Center, Houston, Texas, 77030, United States|Princess Margaret Cancer Centre, Toronto, Ontario, M5G…
NCT02839681	Anetumab ravtansine	Mesothelin	Anti-Mesothelin Antibody Drug Conjugate Anetumab Ravtansine for Mesothelin Expressing Lung Adenocarcinoma	https://clinicaltrials.gov/study/NCT02839681		TERMINATED	Background: Anetumab ravtansine is a new drug. It kills cancer cells that carry mesothelin. That is a protein on the surface of tumor cells in many types of tumors, including most lung cancers. Researchers want to find a safe dose for the study drug for lung cancer. They want to see if it can shrink tumors in mesothelin-positive lung cancer. Objectives: To test the safety and effectiveness of ane…	YES	Lung Neoplasms	DRUG: Anetumab Ravtansine|DEVICE: Blood test	Recommended Phase 2 Dose (RP2D), The highest dose tested at which no more than 1 dose limiting toxicity occurs. A dose limiting toxicity is defined as any treatment emergent adverse event (TEAE) (i.e., absolute neutrophil count \<500/mm\^3 for ≥7 days) occurring during Cycle 1 and regarded to be at least possibly related to anetumab ravtansine., 21 days after initiation of study therapy|Proportio…	Progression Free Survival, Length of time from start of treatment to time of progression or death, whichever occurs first. Response was assessed by the Response Evaluation Criteria in Solid Tumors (RECIST). Progression is at least a 20% increase in the sum of the diameters of target lesions, taking as reference the smallest sum on study (this includes the baseline sum if that is the smallest on s…		National Cancer Institute (NCI)		ALL	ADULT, OLDER_ADULT	PHASE2	2	NIH	INTERVENTIONAL	Allocation: NON_RANDOMIZED|Intervention Model: SEQUENTIAL|Masking: NONE|Primary Purpose: TREATMENT	160145|16-C-0145	2016-07-19	2018-06-12	2018-07-25	2016-07-21	2019-05-21	2019-05-21	National Institutes of Health Clinical Center, Bethesda, Maryland, 20892, United States	Study Protocol and Statistical Analysis Plan, https://cdn.clinicaltrials.gov/large-docs/81/NCT02839681/Prot_SAP_000.pdf|Informed Consent Form, https://cdn.clinicaltrials.gov/large-docs/81/NCT02839681/ICF_001.pdf
NCT02368951	Aprutumab ixadotin	FGFR2	Phase I, Dose-escalation Trial of BAY1187982 in Subjects With Advanced Solid Tumors Known to Express Fibroblast Growth Factor Receptor 2 (FGFR2)	https://clinicaltrials.gov/study/NCT02368951		TERMINATED	To evaluate the safety, tolerability, maximum tolerated dose, pharmacokinetics, and pharmacodynamics of the anti-FGFR2 antibody drug conjugate BAY1187982 in subjects with advanced solid tumors known to express fibroblast growth factor receptor 2 (FGFR2)	NO	Medical Oncology	DRUG: BAY1187982	Maximum tolerated dose(MTD), The MTD is defined as the maximum dose at which the incidence of DLTs during Cycle 1 is below 20%, or the maximum dose administered, whichever is achieved first during dose escalation, Up to 2 years|Number of subjects with adverse events as a measure of safety and tolerability, Up to 2 years|Number of subjects with serious adverse events as a measure of safety and tol…	Cmax (maximum observed drug concentration in measured matrix after single dose administration), Cycles 1 and 3, Day 1: pre-dose, end of infusion, Day 2, Day 3, Day 5, Day 8, and Day 15.Cycles 2 and 4: Day 1: pre-dose.Cycle 5 Day 1 and every odd cycles after: pre-dose and end of infusion|AUC(0-tlast) AUC from time 0 to the last data point >LLOQ, Cycles 1 and 3, Day 1: pre-dose, end of infusion, Da…		Bayer		ALL	ADULT, OLDER_ADULT	PHASE1	20	INDUSTRY	INTERVENTIONAL	Allocation: NA|Intervention Model: SINGLE_GROUP|Masking: NONE|Primary Purpose: TREATMENT	16897	2015-03-24	2016-07-27	2016-07-27	2015-02-23		2017-07-12	San Francisco, California, 94115, United States|Santa Monica, California, 90404-1200, United States|New Haven, Connecticut, 06520, United States|Chicago, Illinois, 60611, United States|Baltimore, Maryland, 21231, United States|Saint Louis, Missouri, 63110, United States|New York, New York, 10016, United States|Nashville, Tennessee, 37232, United States|Houston, Texas, 77030, United States|Seattle…
NCT04132960	Trastuzumab deruxtecan	ERBB2	Study of DS-8201a, an Antibody Drug Conjugate for Advanced Breast Cancer Patients, With Biomarkers Analysis	https://clinicaltrials.gov/study/NCT04132960	DAISY	ACTIVE_NOT_RECRUITING	Multicenter, open-label phase II trial assessing the efficacy of DS-8201a monotherapy in patients with metastatic breast cancer.	NO	Breast Tumors	DRUG: DS-8201a	Antitumor activity of DS-8201a in the 3 cohorts of patients, The primary endpoint is antitumor activity of DS-8201a carried out by the determination of the confirmed best objective response (BOR) rate in each cohort. The BOR is defined as the presence of a confirmed partial or complete response observed on treatment, as assessed by investigators., 12 months			UNICANCER	Daiichi Sankyo Europe, GmbH, a Daiichi Sankyo Company	ALL	ADULT, OLDER_ADULT	PHASE2	186	OTHER	INTERVENTIONAL	Allocation: NA|Intervention Model: SINGLE_GROUP|Masking: NONE|Primary Purpose: TREATMENT	UC-0105/1815|2018-004868-57	2019-10-21	2021-10-29	2025-04-22	2019-10-21		2023-12-07	Institut de Cancérologie de l'Ouest - Site Paul Papin, Angers, France|Institut Bergonié, Bordeaux, France|Centre Fran?ois Baclesse, Caen, France|Sasu Roc 37, Chambray Les Tours, France|Centre Jean Perrin, Clermont-Ferrand, France|Centre Oscar Lambret, Lille, France|Centre Hospitalier Universitaire Dupuytren, Limoges, France|Centre Léon Bérard, Lyon, France|Institut Paoli Calmettes, Marseille, Fra…
NCT00031187	SGN-15	Lewis Y	Study of SGN-15, Antibody-Drug Conjugate, to Treat Hormone Refractory Prostate Cancer	https://clinicaltrials.gov/study/NCT00031187		COMPLETED	SGN-15 is being investigated for therapy of patients with prostate cancer in combination with the cytotoxic agent, Taxotere. The study is an open label, randomized phase II study for patients with documented hormone refractory prostate cancer who have not had any prior therapy with Taxotere or Novantrone. Both SGN-15 and Taxotere will be administered weekly over two 6 week courses separated by a …	NO	Prostatic Neoplasms	DRUG: SGN-15 (cBR96-doxorubicin immunoconjugate)|DRUG: Taxotere (docetaxel)				Seagen Inc.		MALE	ADULT, OLDER_ADULT	PHASE2	160	INDUSTRY	INTERVENTIONAL	Allocation: RANDOMIZED|Intervention Model: PARALLEL|Masking: NONE|Primary Purpose: TREATMENT	SG0001-015	2000-10-01		2024-07-03	2002-02-28		2011-10-24	Arizona Cancer Center, Tucson, Arizona, 85724, United States|Highlands Oncology Group, Springdale, Arkansas, 72764, United States|West Los Angeles - VA Healthcare Center, Los Angeles, California, 90073, United States|VA Medical Center of Palo Alto, Palo Alto, California, 94304, United States|Sharp HealthCare, Sidney Kimmel Cancer Center, San Diego, California, 92121, United States|Bendheim Cancer…
NCT05652868	MYTX-011	MET	Clinical Study of Antibody-Drug Conjugate MYTX-011 in Subjects With Non-Small Cell Lung Cancer	https://clinicaltrials.gov/study/NCT05652868		RECRUITING	This is a Phase I open label multi-center study to evaluate the safety, tolerability, pharmacokinetics and preliminary effectiveness of the investigational drug MYTX-011 in patients with locally advanced, recurrent or metastatic NSCLC. MYTX-011 is in a class of medications called antibody drug conjugates (ADCs). MYTX-011 is composed of a pH-dependent anti-MET antibody and the potent antimicrotubu…	NO	NSCLC|NSCLC Stage IV|NSCLC Stage IIIB|Non-Small Cell Lung Cancer|Advanced Non-Small Cell Squamous Lung Cancer|Advanced Non-Small Cell Lung Cancer|Advanced Non-Small Cell Non-Squamous Lung Cancer	DRUG: MYTX-011	Part 1: Number of patients with dose limiting toxicity (DLT), The dose limiting toxicities will be based on number and severity of treatment-related adverse events., Up to Day 21|Part 2: Number of patients with tumor response, The overall response rate will be based on number of complete responses and partial responses., 2 years	Part 1: Pharmacokinetic (PK) parameter (Total ADC), Total ADC, 24 months|Part 1: Pharmacokinetic (PK) parameter (Total antibody), Total antibody, 24 months|Part 1: Pharmacokinetic (PK) parameter (Free MMAE), Free MMAE, 24 months|Part 1: ADA, Presence of anti-drug antibodies, 24 months|Part 1: ORR, Complete response + partial response, 24 months|Part 1: DOR, TTR, DCR, Duration of response in patie…		Mythic Therapeutics		ALL	ADULT, OLDER_ADULT	PHASE1	150	INDUSTRY	INTERVENTIONAL	Allocation: NON_RANDOMIZED|Intervention Model: SEQUENTIAL|Masking: NONE|Primary Purpose: TREATMENT	MYTX-011-01|KisMET-01	2023-03-23	2024-12-25	2024-12-27	2022-12-15		2024-06-20	University of California San Diego, La Jolla, California, 92037, United States|UCLA, Los Angeles, California, 90095, United States|Winship Cancer Institute, Emory University, Atlanta, Georgia, 30322, United States|KisMET-01 Clinical Site, Rolling Meadows, Illinois, 60008, United States|Massachusetts General Hospital, Boston, Massachusetts, 02114, United States|Nebraska Cancer Specialists, Omaha, …
NCT05174637	FDA018-ADC	TROP2	A Study of FDA018-ADC in Patients With Advanced Solid Tumors	https://clinicaltrials.gov/study/NCT05174637		RECRUITING	This is a Phase 1, open-label, dose escalation and dose expansion study to evaluate the safety, tolerability, pharmacokinetics and efficacy of FDA018-ADC in patients with advanced/metastatic solid tumors.	NO	Advanced/ Metastatic Solid Tumors	DRUG: FDA018-ADC	The dose limiting toxicity ( DLT), Evaluated according to NCI CTCAE V5.0, From first dose to the end of Cycle 1, up to 35 days.|The maximum tolerated dose (MTD), Maximum tolerated dose (MTD) is defined as the dose level immediately below the dose level at which 2 or more in a cohort of either 3 or 6 patients experiences a dose limiting toxicity (DLT) attributed to FDA018., From first dose to the …	Time to peak (Tmax), Tmax of Total Antibody, Total SN-38, Free SN-38, SN-38 Glucuronide and FDA018-ADC will be measured., Up to 17 weeks.|Half-life time (t1/2), t1/2 of Total Antibody, Total SN-38, Free SN-38, SN-38 Glucuronide and FDA018-ADC will be measured., Up to 17 weeks.|Peak Plasma Concentration (Cmax), Cmax of Total Antibody, Total SN-38, Free SN-38, SN-38 Glucuronide and FDA018-ADC will …		Shanghai Fudan-Zhangjiang Bio-Pharmaceutical Co., Ltd.		ALL	ADULT, OLDER_ADULT	PHASE1	78	INDUSTRY	INTERVENTIONAL	Allocation: NON_RANDOMIZED|Intervention Model: SEQUENTIAL|Masking: NONE|Primary Purpose: TREATMENT	F0024-101	2021-10-22	2024-12-29	2024-12-29	2022-01-03		2024-05-14	Fudan University Shanghai Cancer Center, Shanghai, Shanghai, 200000, China
NCT02565758	ABBV-085	LRRC15	ABBV-085, an Antibody Drug Conjugate, in Subjects With Advanced Solid Tumors	https://clinicaltrials.gov/study/NCT02565758		COMPLETED	This is an open-label dose escalation study designed to evaluate the safety and pharmacokinetics of ABBV-085 and determine the recommended Phase 2 dose (as monotherapy or in combination with standard therapies) in subjects with advanced solid tumors.	NO	Advanced Solid Tumors|Undifferentiated Pleomorphic Sarcoma|Squamous Cell Carcinoma of the Head and Neck|Carcinoma of the Breast	DRUG: ABBV-085	Terminal elimination half life of ABBV-085., UP to 24 months|Maximum observed plasma concentration (Cmax) of ABBV-085., Up to 24 months|Number of participants with Adverse Events, Collect all adverse events at each visit., Up to 24 months|Area under the curve (AUC) from time zero to the last measurable concentration AUC(0-t) of ABBV-085., AUC (0-t) = Area under the serum concentration curve from …	Objective response rate (ORR), ORR is defined as the proportion of the participants who achieve a complete response (CR) or partial response (PR)., Up to 24 months|Progression free survival (PFS), PFS is defined as the time from the first dose date of ABBV-085 to either disease progression or death, whichever occurs first., Up to 24 months|Duration of overall response (DOR), DOR is defined as the…		AbbVie		ALL	ADULT, OLDER_ADULT	PHASE1	85	INDUSTRY	INTERVENTIONAL	Allocation: NON_RANDOMIZED|Intervention Model: SINGLE_GROUP|Masking: NONE|Primary Purpose: TREATMENT	M15-394|2015-001645-84	2015-09-18	2019-03-25	2019-03-25	2015-10-01		2019-04-05	Mayo Clinic Arizona /ID# 148582, Phoenix, Arizona, 85054, United States|Scottsdale Healthcare /ID# 151349, Scottsdale, Arizona, 85258-4566, United States|University of California, Los Angeles /ID# 148586, Los Angeles, California, 90095, United States|Univ of Colorado Cancer Center /ID# 148581, Aurora, Colorado, 80045, United States|University of Chicago /ID# 148579, Chicago, Illinois, 60637-1443,…
NCT02277717	Trastuzumab Duocarmazine	ERBB2	First-in-human Study With the Antibody-drug Conjugate SYD985 to Evaluate Safety and Efficacy in Cancer Patients	https://clinicaltrials.gov/study/NCT02277717		COMPLETED	The purpose of this study is to evaluate the safety of a new medicinal drug SYD985 at different dose levels in patients with cancer, to understand how SYD985 is handled by the body and to evaluate the effect of SYD985 on the cancer.	NO	Solid Tumors	DRUG: SYD985 (trastuzumab vc-seco-DUBA)	Incidence of dose-limiting toxicities, first cycle, 21 days	Number of patients with adverse events, up to 2 years|Area under the plasma concentration versus time curve (AUC) of SYD985, Baseline, Days 1,2,3,4,8,15 of Cycle 1, Days 1,8,15 of Cycle 2, Day 1 of subsequent cycles up to 2 years|Peak plasma concentration of SYD985, Baseline, Days 1,2,3,4,8,15 of Cycle 1, Days 1,8,15 of Cycle 2, Day 1 of subsequent cycles up to 2 years|Change from baseline in hem…		Byondis B.V.		ALL	ADULT, OLDER_ADULT	PHASE1	185	INDUSTRY	INTERVENTIONAL	Allocation: NA|Intervention Model: SINGLE_GROUP|Masking: NONE|Primary Purpose: TREATMENT	SYD985.001	2024-10-14	2024-01-19	2024-10-19	2014-10-29		2023-08-14	UZ, Antwerp, Belgium|Institut Jules Bordet, Brussels, Belgium|UZ, Gent, Belgium|NKI-AvL, Amsterdam, Netherlands|UMC, Groningen, Netherlands|Radboud UMC, Nijmegen, Netherlands|UMC, Rotterdam, Netherlands|Institut Catala d'Oncologia, Barcelona, Spain|Vall d'Hebron University Hospital, Barcelona, Spain|START Madrid-CIOCC, Madrid, Spain|START Madrid-FJD, Madrid, Spain|Beatson Institute for Cancer Res…
NCT04064359	OBT076	CD205	Safety and Preliminary Efficacy of OBT076 in Recurrent/Metastatic CD205+ Solid Tumors	https://clinicaltrials.gov/study/NCT04064359		RECRUITING	The purpose of this study is to evaluate OBT076, which is a drug that combines an antibody with an anti-cancer drug. This class of drugs are called Antibody-Drug Conjugates (ADC). Antibodies are normally produced in the human body by the immune system to fight infections but can be designed to target cancer cells and deliver an anti-cancer drug. OBT076 is composed of an antibody that targets the …	NO	Solid Tumor	DRUG: OBT076, a CD205-directed antibody-drug conjugate	Incidence of Adverse Events (AEs) as assessed by NCI CTCAE (Version 5), Assess incidence of all AEs by NCI CTCAE (Version 5) grades 1-5, 1 year|Percentage of subjects with dose-limiting toxicities (DLTs) as assessed by NCI CTCAE (Version 5), DLTs defined by NCI CTCAE (Version 5) grades 3-4, with exceptions for duration, 1 year	Clinical Benefit Ratio (CBR), RECIST, Version 1.1, 2 years|Overall Response Rate (ORR), RECIST, Version 1.1, 2 years|Duration of Response (DoR), Kaplan-Meier methodology, 2 years|Progression Free Survival (PFS), Kaplan-Meier methodology, 2 years|Overall Survival (OS), Kaplan-Meier methodology, 2 years|Area under the Plasma Concentration versus Time Curve (AUC) of OBT076, Statistics including numb…	Quantification of Serum Protein, Enzyme-linked Immunosorbant Assay (ELISA), 2 years|Quantification of Peripheral Blood CD205+ Cells, Flow Cytometry, 2 years|Quantification of Immune Cells (ICs) in Tumor Microenvironment (TME), Immunohistochemistry, 2 years	Oxford BioTherapeutics Ltd		ALL	ADULT, OLDER_ADULT	PHASE1	200	INDUSTRY	INTERVENTIONAL	Allocation: NA|Intervention Model: SINGLE_GROUP|Masking: NONE|Primary Purpose: TREATMENT	OBT076-001	2019-07-25	2026-12-31	2027-12-31	2019-08-21		2024-02-07	Mayo Clinic, Phoenix, Arizona, 85084, United States|Cedars-Sinai, Los Angeles, California, 90048, United States|UCLA, Santa Monica, California, 90404, United States|Moffitt Cancer Center, Tampa, Florida, 33612, United States|The State University of Iowa, Iowa City, Iowa, 52242, United States|St. Elizabeth Healthcare, Edgewood, Kentucky, 41017, United States|University of Mississippi Medical Cente…
NCT05060276	STI-3258	TROP2	Study to Assess an Anti-Trop2 Antibody Drug Conjugate in Relapsed or Refractory Solid Tumors	https://clinicaltrials.gov/study/NCT05060276		WITHDRAWN	This is a phase 1b, open-label, dose-escalation study o STI-3258 administered intravenously in subjects with relapsed or refractory solid tumors.	NO	Relapsed Solid Neoplasm|Refractory Cancer|Solid Tumor, Adult	BIOLOGICAL: STI-3258	Incidence of adverse events by type, frequency, severity, and causality (safety), Safety as assessed by incidence of adverse events (AEs) by type, frequency, severity, and causality, Baseline through study completion at up to approximately 24 months|Incidence of treatment-emergent adverse events by type, frequency, severity, and causality (safety), Safety as assessed by incidence of treatment-eme…	Assess preliminary efficacy of STI-3258, To assess the preliminary efficacy of STI-3258 in the treatment of patients with RRSTs based upon Response evaluation criteria in solid tumors (RECIST)., Baseline through study completion at up to approximately 24 months|Assess the area under the curve (AUC) pharmacokinetic profile of STI-3258, To assess the AUC of STI-3258 in plasma as a measure of exposu…		Sorrento Therapeutics, Inc.		ALL	ADULT, OLDER_ADULT	PHASE1	0	INDUSTRY	INTERVENTIONAL	Allocation: NA|Intervention Model: SEQUENTIAL|Masking: NONE|Primary Purpose: TREATMENT	T2ADC-RRST-101	2024-12-22	2024-05-24	2024-12-24	2021-09-29		2023-01-26
NCT03255070	ARX788	ERBB2	A Dose-escalation, Expansion Study of ARX788, in Advanced Solid Tumors Subjects With HER2 Expression (ACE-Pan Tumor 01)	https://clinicaltrials.gov/study/NCT03255070		COMPLETED	This 2-part, Phase 1, open-label study will determine the recommended Phase 2 dose (RP2D) of ARX788 in subjects with advanced HER2 positive cancers and will assess the safety and anticancer activity in breast, gastric and other advanced HER2 positive solid tumors.	NO	Breast Neoplasms|Gastric Neoplasm|Solid Tumors	DRUG: ARX788	Number of subjects experiencing adverse events, frequency and seriousness of treatment emergent adverse events (TEAEs), To assess the safety, tolerability, and immunogenicity profile, Day 1 through 30 days after last dose|Phase 1b: Objective response rate (ORR: complete response + partial response) per imaging assessment based on RECIST version 1.1., Number of subjects with objective response is …	Number of subjects with tumor response per imaging assessment based on RECIST version 1.1., The objective response rate (ORR: CR+PR) based on RECIST v1.1 will be assessed as the primary endpoint to determine the anticancer activity of ARX788 as well as best overall response., 18 months|Area under the concentration-time curve (AUC) from first infusion to subject end of study., Pharmacokinetic (PK)…		Ambrx, Inc.		ALL	ADULT, OLDER_ADULT	PHASE1	106	INDUSTRY	INTERVENTIONAL	Allocation: NON_RANDOMIZED|Intervention Model: SEQUENTIAL|Masking: NONE|Primary Purpose: TREATMENT	ARX788-1711	2018-03-20	2023-09-13	2023-10-18	2017-08-21		2024-02-01	USC Norris Cancer Hospital, Los Angeles, California, 90033, United States|UCLA Hematology-Oncology, Santa Monica, California, 90095, United States|Washington University School of Medicine, Saint Louis, Missouri, 63110, United States|Cleveland Clinic, Cleveland, Ohio, 44195, United States|Baylor Sammons Cancer Center, Dallas, Texas, 75246, United States|Research Site, East Albury, New South Wales,…
NCT05564858	FDA022-BB05	ERBB2	A Study of FDA022-BB05 in Subjects With Advanced Solid Malignant Tumors	https://clinicaltrials.gov/study/NCT05564858		RECRUITING	This is a Phase 1, open-label and two-part study to evaluate the safety, tolerability, pharmacokinetics and efficacy of FDA022-BB05 in participants with advanced/metastatic solid malignant tumors.	NO	Advanced Solid Tumors	DRUG: FDA022 Monoclonal antibody-drug conjugate for injection Phase Ia|DRUG: FDA022 Monoclonal antibody-drug conjugate for injection Phase Ib	Dose-limiting toxicity (DLT), DLT will be assessed according to NCICTCAE v5.0., Cycle 1 (21Days)|Maximum tolerated dose (MTD）, MTD will be defined as the maximum dose level at which no more than 1 of 3 patients experience a DLT within cycle1 (21 days) of DLT observing period., Cycle 1 (21 Days)|Incidence of treatment-related adverse events (AEs) and serious adverse events (SAEs), The AEs and SAEs…	Pharmacokinetic (PK) characteristics, Cmax, Peak Plasma Concentration, From cycle1 to Cycle10 (each cycle is 21 days. )|Pharmacokinetic (PK) characteristics, Tmax, Time of peak plasma concentration, From cycle1 to Cycle10 (each cycle is 21 days. )|Pharmacokinetic (PK) characteristics，AUC, Area under the plasma concentration versus time curve, From cycle1 to Cycle10 (each cycle is 21 days. )|Pharm…		Shanghai Fudan-Zhangjiang Bio-Pharmaceutical Co., Ltd.		ALL	ADULT, OLDER_ADULT	PHASE1	107	INDUSTRY	INTERVENTIONAL	Allocation: NON_RANDOMIZED|Intervention Model: SEQUENTIAL|Masking: NONE|Primary Purpose: TREATMENT	F0034-101	2023-01-16	2024-09-25	2024-11-25	2022-10-04		2024-05-17	Department of Phase I Clinical Trial Center, Beijing Shijitan Hospital, Beijing, Beijing, 100038, China
NCT04695847	M1231	EGFR;MUC-1	M1231 in Participants With Solid Tumors	https://clinicaltrials.gov/study/NCT04695847		COMPLETED	This study is to establish a safe and tolerable dose and to investigate pharmacokinetics and the first clinical efficacy signals of M1231 as a single agent in participants with solid tumors (Part 1) and with metastatic Non-small Cell Lung Cancer (NSCLC) and esophageal squamous cell carcinoma (Part 2). Dose escalation will be followed by the dose expansion once the maximum tolerated dose (MTD) or …	NO	Metastatic Solid Tumors|Esophageal Cancer|Non-Small Cell Lung Cancer	DRUG: M1231|DRUG: M1231	Part 1: Number of Participants with Dose Limiting Toxicities (DLTs), Day 1 Up to Day 21|Part 1: Number of Participants with Treatment Emergent Adverse Events (TEAEs) and Treatment Related TEAEs, From Baseline until 4 months|Part 2: Objective Response (OR) According to Response Evaluation Criteria in Solid Tumors (RECIST) Version 1.1 as Assessed by Investigators, From Baseline until 6 months|Part …	Part 1:Area Under Plasma Concentration-Time Curve Within One Dosing Interval (AUC0-tau) of M1231 (Conjugated Payload), Total Antibody and Free Payload M1231, Cycle 1 Day 1 to Cycle 3 Day 15 and every second cycle from Cycle 4 (each cycle is of 21 days), assessed up to approximately 4 months|Part 1: Dose Normalized Area Under Concentration-Time Curve Within One Dosing Interval (AUC0-tau/Dose) of M…		EMD Serono Research & Development Institute, Inc.	Merck KGaA, Darmstadt, Germany	ALL	ADULT, OLDER_ADULT	PHASE1	23	INDUSTRY	INTERVENTIONAL	Allocation: NON_RANDOMIZED|Intervention Model: PARALLEL|Masking: NONE|Primary Purpose: TREATMENT	MS201668_0001	2021-01-13	2023-06-23	2023-06-23	2021-01-05		2023-07-07	MD Anderson Cancer Center - Clinical Cancer Prevention, Houston, Texas, 77030, United States|NEXT Oncology, San Antonio, Texas, 78229, United States|Princess Margaret Cancer Centre, Toronto, Canada
NCT05584709	STI-6129	CD38	Study to Access Anti-CD38 Anibody Drug in Patients With Advanced Solid Tumors	https://clinicaltrials.gov/study/NCT05584709		NOT_YET_RECRUITING	This study is a Phase 1b, single-center, open-label, dose-finding trial designed to identify the Recommended Phase 2 Dose (RP2D) of STI 6129 by assessing the safety, preliminary efficacy, and immunogenicity in subjects with any advanced solid tumor. The patients that will be treated with STI-6129 in this trial are advanced solid tumor patients who have received prior lines of treatment.	NO	Advanced Solid Tumor	BIOLOGICAL: STI-6129	Incidence of adverse events by type, frequency, severity, and causality (safety), Safety as assessed by incidence of adverse events (AEs) by type, frequency, severity, and causality, Baseline through study completion at up to approximately 24 months|Incidence of serious adverse events by type, frequency, severity, and causality (safety), Safety as assessed by incidence of serious AEs (SAEs) by ty…	Evaluation of response rate, Evaluation of response rate for advanced solid tumors using Response Evaluation Criteria in Solid Tumors, version 1.1 (RECIST v1.1), Baseline through study completion at up to approximately 24 months|Overall response, Response assessed according to the Evaluation Criteria in Solid Tumors (RECIST v1.1), Baseline through study completion at up to approximately 24 months…		Sorrento Therapeutics, Inc.		ALL	ADULT, OLDER_ADULT	PHASE1	34	INDUSTRY	INTERVENTIONAL	Allocation: NA|Intervention Model: SEQUENTIAL|Masking: NONE|Primary Purpose: TREATMENT	38ADC-AST-101	2024-03-23	2024-08-25	2024-10-25	2022-10-18		2023-01-30	Columbia University Medical Center, New York, New York, 10032, United States
NCT04610528	Patritumab Deruxtecan	ERBB3	A Window-of-opportunity Study of U3-1402, a HER3-targeting Antibody-drug Conjugate in Operable Breast Cancer According to ERBB3 Expression	https://clinicaltrials.gov/study/NCT04610528	TOT-HER3	ACTIVE_NOT_RECRUITING	This is a prospective, multicenter, single arm, window-of-opportunity study evaluating the biological effect of U3-1402 in treatment na?ve patients with early breast cancer, whose primary tumors are ≥1 cm by ultrasound evaluation. The primary objective is to evaluate the biological activity of U3-1402, measured as the CelTIL score increase at post-treatment (C1D21) in HR+/HER2-negative BC include…	NO	Breast Cancer	DRUG: U3 1402|DRUG: U3 1402	CelTIL score, Mean change in CelTIL score per central assessment in paired samples. CelTIL score = -0.8 × tumor cellularity (in %) + 1.3 × TILs (in %). The minimum and maximum unscaled CelTIL scores will be -80 and 130. This unscaled CelTIL score will then be scaled to reflect a range from 0 to 100 points., baseline and after one dose of U3-1402 at Cycle 1 Day 21	CelTIL score, Mean change in CelTIL score per central assessment in paired samples for each ERBB3 cohort, baseline and after one dose of U3-1402 at Cycle 1 Day 21|ERBB3 levels vs. CelTIL score, ERBB3 mRNA baseline levels and changes in CelTIL score for all patients and for each ERBB3 cohort, baseline and after one dose of U3-1402 at Cycle 1 Day 21|HER3 IHC vs. CelTIL score, HER3 IHC baseline leve…		SOLTI Breast Cancer Research Group	Daiichi Sankyo	ALL	ADULT, OLDER_ADULT	EARLY_PHASE1	80	OTHER	INTERVENTIONAL	Allocation: NA|Intervention Model: SINGLE_GROUP|Masking: NONE|Primary Purpose: TREATMENT	SOLTI-1805|2019-004964-23	2020-12-22	2022-01-30	2023-09-30	2020-10-30		2023-06-23	ICO Badalona, Badalona, Barcelona, Spain|Institut Català d'Oncologia Hospitalet, Hospitalet de Llobregat, Barcelona, Spain|Hospital Universitario de Canarias, Tenerife, Islas Canarias, 38320, Spain|Hospital Universitario de Fuenlabrada, Fuenlabrada, Madrid, Spain|Hospital Universitari Vall d'Hebrón, Barcelona, 08035, Spain|Hospital Clínic de Barcelona, Barcelona, 08036, Spain|Centro Integral Onco…
NCT01414283	PSMA ADC	PSMA	Prostate-specific Membrane Antigen Antibody-Drug Conjugate in Subjects With Prostate Cancer	https://clinicaltrials.gov/study/NCT01414283		COMPLETED	Prostate-specific Membrane Antigen Antibody-Drug Conjugate (PSMA ADC) 1301 is an open-label, dose-escalation phase 1 study of PSMA ADC administered IV in subjects with progressive, castration-resistant, metastatic prostate cancer that has progressed after prior taxane therapy. For all subjects, PSMA ADC will be administered in four repeating cycles.	NO	Prostate Cancer	DRUG: PSMA ADC	Determine the maximum tolerated dose of PSMA ADC, 13 weeks			Progenics Pharmaceuticals, Inc.		MALE	ADULT, OLDER_ADULT	PHASE1	52	INDUSTRY	INTERVENTIONAL	Allocation: NON_RANDOMIZED|Intervention Model: SINGLE_GROUP|Masking: NONE|Primary Purpose: TREATMENT	PSMA ADC 1301	2024-10-08	2024-04-13	2024-09-13	2011-08-11		2013-11-01	Progenics Pharmaceuticals, Inc., Tarrytown, New York, 10591, United States
NCT05498597	AMT-151	FOLR1	AMT-151 in Patients With Selected Advanced Solid Tumours	https://clinicaltrials.gov/study/NCT05498597		RECRUITING	This first-in-human study will evaluate the Maximum Tolerated Dose (MTD) / the Recommended Phase 2 Dose (RP2D), safety, tolerability, anti-tumor activity, pharmacokinetics, pharmacodynamics and immunogenicity of AMT-151, a novel antibody-drug conjugate against folate receptor alpha, in patients with selected advanced solid tumors.	NO	Advanced Solid Tumor|Advanced Cancer|Advanced Carcinoma|Ovarian Cancer|Ovarian Carcinoma|Ovarian Epithelial Cancer|Ovarian Endometrioid Adenocarcinoma|Endometrial Cancer|Endometrial Adenocarcinoma|Endometrial Serous Adenocarcinoma|Endometrial Endometrioid Adenocarcinoma|Endometrial Clear Cell Adenocarcinoma|Lung Adenocarcinoma|Triple Negative Breast Cancer|Pancreatic Ductal Adenocarcinoma|Maligna…	DRUG: AMT-151	Recommended Phase 2 Dose (RP2D), The RP2D will be determined using dose limiting toxicities (DLTs) and all other available study data, Up to 24 months|Maximum Tolerated Dose (MTD), The MTD will be determined using DLTs, Up to 24 months|Incidence of Adverse Events, Safety and tolerability profile assessed by the Common Terminology Criteria for Adverse Events v5.0, Up to 24 months	Overall Response Rate (ORR) according to the Response Evaluation Criteria in Solid Tumours (RECIST) v1.1, Proportion of patients achieving Complete Response (CR) or Partial Response (PR), Up to 24 months|Disease Control Rate (DCR) according to the RECIST v1.1, Proportion of patients achieving CR, PR or Stable Disease (SD), Up to 24 months|Progression-free Survival (PFS), Time from date of start o…		Multitude Therapeutics Inc.	Tigermed Consulting Co., Ltd	ALL	ADULT, OLDER_ADULT	PHASE1	30	INDUSTRY	INTERVENTIONAL	Allocation: NA|Intervention Model: SINGLE_GROUP|Masking: NONE|Primary Purpose: TREATMENT	AMT-151-01	2023-01-25	2024-01-01	2024-10-30	2022-08-12		2023-10-19	Chris O'Brien Lifehouse, Sydney, New South Wales, Australia|ICON Cancer Centre, Brisbane, Queensland, Australia|Mater Cancer Care Centre, South Brisbane, Queensland, Australia|Cancer Research SA, Adelaide, South Australia, Australia|Cabrini Malvern Hospital, Malvern, Victoria, Australia|One Clinical Research (OCR), Perth, Western Australia, Australia|Fujian Provincial Cancer Hospital, Fuzhou, Fuj…
NCT05867563	TQB2103	CLaudin 18.2	Clinical Trial Evaluating the Safety of the TQB2103 for Injection	https://clinicaltrials.gov/study/NCT05867563		RECRUITING	TQB2103 injection is an antibody-drug conjugate (ADC) targeting claudin (CLDN) 18.2. This study aimed to evaluate the safety and tolerability, pharmacokinetic characteristics and immunogenicity of TQB2103 injection in patients with advanced malignant tumors as well as its initial effectiveness.	NO	Advanced Malignant Neoplasm	DRUG: TQB2103 for injection	Dose limiting toxicity (DLT), DLT was defined as toxicities that meet pre-defined severity criteria according to the National Cancer Institute Common Terminology Criteria for Adverse Events (NCI CTCAE) v5.0, and assessed as having suspected relationship to investigational drug that occurred within the first treatment cycle (21 days)., During the first treatment cycle (21 days).|Maximum tolerated …	The area under the curve (AUC), The area under the curve (AUC) of serum or plasma concentration of ADC drug, total antibody, and small molecule toxin., 2 hours pre-dose, 0, 2, 4, 7, 24, 72, 144, 312, 504 hours (when necessary) after dose on cycle 1 and cycle 3; 2 hours pre-dose, 0 hour, 504 hours (when necessary) after dose on cycle 2, cycle 4, cycle 6, cycle 8. Each cycle is 21 days.|Peak concen…		Chia Tai Tianqing Pharmaceutical Group Nanjing Shunxin Pharmaceutical Co., Ltd.		ALL	ADULT, OLDER_ADULT	PHASE1	71	INDUSTRY	INTERVENTIONAL	Allocation: NA|Intervention Model: SINGLE_GROUP|Masking: NONE|Primary Purpose: TREATMENT	TQB2103-I-01	2023-07-04	2024-05-25	2024-05-25	2023-05-22		2023-07-10	Henan Cancer Hospital, Zhengzhou, Henan, 450008, China|Hunan Cancer Hospital, Changsha, Hunan, 410013, China|Xuzhou Central Hospital, Xuzhou, Jiangsu, 221111, China|Zhejiang Cancer Hospital, Hangzhou, Zhejiang, 310022, China
NCT02448420	Trastuzumab emtansine	ERBB2	Study of Palbociclib and Trastuzumab With Endocrine Therapy in HER2-positive Metastatic Breast Cancer	https://clinicaltrials.gov/study/NCT02448420	PATRICIA II	COMPLETED	PATRICIA is a phase II, open-label, multicentre, Simon's two-stage-design study of the combination of palbociclib plus trastuzumab, with or without letrozole, in post-menopausal patients with HER2-positive locally advanced or metastatic breast cancer (MBC) who have received chemotherapy and treatment with trastuzumab for their metastatic disease. Cohorts A, B1, and B2 based on their HR status and…	NO	Metastatic Breast Cancer	DRUG: Palbociclib|DRUG: Trastuzumab|DRUG: Endocrine therapy|DRUG: Chemotherapy|DRUG: Antibody-Drug Conjugates	Progression-Free Survival at 6 months, For cohorts A,B1 and B2: This was defined as the proportion of patients alive and without progression (according to RECIST v1.1 criteria), 6 months after randomization., From randomization date to date of first documentation of progression or death , whichever came first, assessed up to 6 months.|Progression-Free Survival (PFS)as Assessed by the Investigator…	Rate of Disease control rate (DCR) in treatment arms (A and B), Number of patients with objective response (complete or partial) or stable disease according to RECIST 1.1 criteria for at least 12 weeks., up to 5 years|Rate of Overall tumour objective response rate (ORR) in treatment arms (A and B)., Number of patients who achieve complete or partial response according to RECIST 1.1 criteria durin…		SOLTI Breast Cancer Research Group		ALL	ADULT, OLDER_ADULT	PHASE2	73	OTHER	INTERVENTIONAL	Allocation: RANDOMIZED|Intervention Model: PARALLEL|Masking: NONE|Primary Purpose: TREATMENT	SOLTI-1303|2014-005006-38	2024-07-15	2023-09-29	2023-11-30	2015-05-19		2024-04-18	ICO-Badalona, Badalona, Barcelona, 08916, Spain|Hospital General De Catalunya, Sant Cugat Del Vallès, Barcelona, 08195, Spain|Hospital Universitario Rey Juan Carlos, Móstoles, Madrid, 28933, Spain|Complejo Hospitalario Universitario A Coru?a, A Coru?a, 15006, Spain|Hospital General Universitario de Alicante, Alicante, Spain|Hospital Universitario de Badajoz, Badajoz, 06080, Spain|Hospital Clínic …
NCT03748186	Luveltamab Tazevibulin	FOLR1	Study of STRO-002, an Anti-Folate Receptor Alpha (FolRα) Antibody Drug Conjugate in Ovarian & Endometrial Cancers	https://clinicaltrials.gov/study/NCT03748186		ACTIVE_NOT_RECRUITING	Phase 1 trial to study the safety, pharmacokinetics and preliminary efficacy of STRO-002 given intravenously every 3 weeks.	NO	Ovarian Cancer|Ovarian Carcinoma|Ovary Cancer|Endometrial Cancer|Endometrioid Adenocarcinoma|Fallopian Tube Cancer|Primary Peritoneal Carcinoma	DRUG: STRO-002	Part 1: Incidence of Treatment-Emergent Adverse Events (Safety and Tolerability of STRO-002), Incidence of adverse events (AEs) observed across STRO-002 dose levels, 18 months|Part 1: Define the recommended phase 2 dose (RP2D) of STRO-002, Frequency of dose-limiting toxicity and exposure across STRO-002 dose levels, 18 months|Part 1: Define the maximum tolerated dose (MTD) of STRO-002, Frequency …	Part 1: Characterize the pharmacokinetics (PK) of STRO-002 by measuring the maximum plasma concentration (Cmax), Measurement of maximum plasma concentration after the administration of STRO-002, 18 months|Part 1: Characterize the PK of STRO-002 by measuring the half-life (t1/2) of STRO-002, Measurement of terminal half-life of STRO-002 after the administration of STRO-002, 18 months|Part 1: Chara…	Part 1: Preliminary assessment of the anti-tumor activity of STRO-002, Objective response rate per RECIST 1.1, 18 months	Sutro Biopharma, Inc.		FEMALE	ADULT, OLDER_ADULT	PHASE1	160	INDUSTRY	INTERVENTIONAL	Allocation: NA|Intervention Model: SEQUENTIAL|Masking: NONE|Primary Purpose: TREATMENT	STRO-002-GM1	2019-02-01	2024-09-24	2024-11-24	2018-11-20		2024-06-11	Arizona Oncology - Tucson, Tucson, Arizona, 85711, United States|UCLA Jonsson Comprehensive Cancer Center Clinical Research Unit, Los Angeles, California, 90095, United States|Sutter Health- Palo Alto Medical Foundation, San Francisco, California, 94109, United States|Rocky Mountain Cancer Center, Aurora, Colorado, 80012, United States|Yale School of Medicine, New Haven, Connecticut, 06520, Unite…
NCT05914545	FZ-AD004	TROP2	A Study of FZ-AD004 in Patients With Advanced Solid Tumors	https://clinicaltrials.gov/study/NCT05914545		RECRUITING	This study is one single group of participants with advanced solid tumors. It is the first time the drug has been used in humans. There will be two parts including Dose Escalation and Dose Expansion to evaluate the safety, tolerability, pharmacokinetics, and clinical activity of FZ-AD004.	NO	Advanced and Metastatic Solid Tumor	DRUG: FZ-AD004	The dose limiting toxicity ( DLT), To determine the dose limiting toxicities (DLTs) of FZ-AD004., 21 Days (first cycle)|Maximum Tolerable Dose (MTD), To determine the maximum tolerated dose (MTD) and/or recommended doses for expansion (RDEs). RDEs will not exceed MTD., 21 Days (first cycle)|Adverse Events, To check the numbers of AEs happened during the course of trial., Screening up to study com…	Progression free survival(PFS) according to RECIST 1.1, Progression-free survival (PFS) was defined as the interval from the first dose start date to the date of disease progression defined as documented progressive disease (PD) or death from any cause, whichever occurs first., From subject randomization up to 60 months.|Duration of Response(DOR) according to RECIST 1.1, Duration of Response was …		Shanghai Fudan-Zhangjiang Bio-Pharmaceutical Co., Ltd.		ALL	ADULT, OLDER_ADULT	PHASE1	121	INDUSTRY	INTERVENTIONAL	Allocation: NA|Intervention Model: SEQUENTIAL|Masking: NONE|Primary Purpose: TREATMENT	F0040-101	2023-06-12	2024-12-25	2024-12-25	2023-06-22		2024-05-17	Shanghai Chest Hospital, Shanghai, China
NCT00051584	SGN-15	Lewis Y	Safety/Efficacy Study of SGN-15 (Antibody-Drug Conjugate) Combined With Gemcitabine in Patients With Ovarian Cancer	https://clinicaltrials.gov/study/NCT00051584		TERMINATED	This is an open-label, randomized phase II trial comparing treatment with a monoclonal antibody (mAb) drug immunoconjugate, SGN-15, administered weekly in combination with weekly Gemzar? (Gemcitabine) to treatment with Gemzar? alone. The primary objectives of this study are to determine the toxicity and safety profile of the combination of SGN-15 and Gemzar?, to estimate the clinical response rat…	NO	Ovarian Neoplasms	DRUG: SGN-15 (cBR96-Doxorubicin Immunoconjugate)|DRUG: Gemzar (Gemcitabine)				Seagen Inc.		FEMALE	ADULT, OLDER_ADULT	PHASE2	60	INDUSTRY	INTERVENTIONAL	Allocation: RANDOMIZED|Intervention Model: PARALLEL|Masking: NONE|Primary Purpose: TREATMENT	SG015-0003			2024-05-03	2003-01-15		2011-10-24	Arizona Cancer Center, Tucson, Arizona, 85724, United States|Sharp Healthcare, San Diego, California, 92123, United States|California Hematology Oncology Medical Group, Torrance, California, 90505, United States|Mountain States Tumor Institute, Boise, Idaho, 83712, United States|Arlington Fairfax Hematology Oncology, Arlington, Virginia, 22205, United States|Virginia Mason Medical Center, Seattle…
NCT02175433	AGS67E	CD37	A Study to Evaluate Safety, Tolerability, and Pharmacokinetics of Escalating Doses of AGS67E Given as Monotherapy in Subjects With Refractory or Relapsed Lymphoid Malignancies	https://clinicaltrials.gov/study/NCT02175433		COMPLETED	The purpose of this study is to evaluate the safety, tolerability and pharmacokinetics of AGS67E both without and with myeloid growth factor (GF) in subjects with refractory or relapsed lymphoid malignancies. Immunogenicity and anticancer activity of AGS67E will also be assessed.	NO	Relapsed Lymphoid Malignancy|Refractory Lymphoid Malignancy	DRUG: AGS67E	Incidence and nature of adverse events, up to 34 months|Pharmacokinetic parameter for total antibody (TAb), antibody drug conjugate (ADC), and Monomethyl Auristatin E (MMAE): Concentration at the end of infusion (CEOI), Escalation: Days 1-4, 8, 15, 22, 43-46, 50, 64 for Cycles 1-4 and predose once every 3 weeks in subsequent cycles. Expansion: Days 1, 3, 8, 22, 43, 45, 64 in Cycles 1-4 and predos…	Incidence of Anti-Drug Antibody (ADA) formation to the fully human monoclonal antibody (AGS67C) and antibody-drug conjugate (AGS67E), Up to 34 months|Incidence of tumor response, Tumor response is defined as either a complete response (CR) or partial response (PR), Up to 34 months|Objective response rate (ORR), ORR for a cohort is defined as the percentage of subjects who experience a best respon…		Astellas Pharma Global Development, Inc.		ALL	ADULT, OLDER_ADULT	PHASE1	71	INDUSTRY	INTERVENTIONAL	Allocation: NON_RANDOMIZED|Intervention Model: SEQUENTIAL|Masking: NONE|Primary Purpose: TREATMENT	AGS67E-14-1	2014-10-14	2019-10-29	2019-10-29	2014-06-26		2020-12-01	Site US0006, Duarte, California, 91010, United States|Site US0002, Stanford, California, 94305, United States|Site US0004, Fairway, Kansas, 66205, United States|Site US0001, New York, New York, 10019, United States|Site CA0005, Vancouver, British Columbia, V5Z 4E6, Canada
NCT04829604	ARX788	ERBB2	ARX788 in HER2-positive, Metastatic Breast Cancer Subjects (ACE-Breast-03)	https://clinicaltrials.gov/study/NCT04829604		RECRUITING	A Global, Phase 2 Study of ARX788 in HER2-positive Metastatic Breast Cancer Patients who were previously treated with T-DXd	NO	HER2 Positive Metastatic Breast Cancer	DRUG: ARX788	Objective response rate (ORR), To evaluate the confirmed objective response rate (ORR) as determined by Investigator assessment based on Response Evaluation Criteria in Solid Tumors Version 1.1 (RECIST 1.1) following treatment with ARX788. The ORR is defined as the number of subjects with a BOR of CR or PR divided by the number of response evaluable subjects., 2 Years	Duration of response (DOR), DOR is defined as the time between the date of first response and the date of disease progression or death, whichever occurs first, will be computed for subjects with a BOR of CR or PR., 2 years|Best overall response (BOR), BOR is defined as the best response recorded from the start of the treatment until disease progression/recurrence (taking as reference for progress…	Evaluate Biomarker, To evaluate exploratory blood- and tissue-based biomarkers related to study drug response, 2 years	Ambrx, Inc.		ALL	ADULT, OLDER_ADULT	PHASE2	71	INDUSTRY	INTERVENTIONAL	Allocation: NA|Intervention Model: SINGLE_GROUP|Masking: NONE|Primary Purpose: TREATMENT	ACE-Breast-03	2021-10-26	2024-06-25	2024-12-26	2021-04-02		2024-06-11	Research Site, Los Angeles, California, 90033, United States|Research Site, Los Angeles, California, 90095, United States|Research Site, Newport Beach, California, 92663, United States|Research Site, San Francisco, California, 94158, United States|Research Site, Santa Barbara, California, 93105, United States|Research Site, Torrance, California, 90505, United States|Research Site, West Los Angele…
NCT02952729	XMT-1522	ERBB2	Study of Antibody Drug Conjugate in Patients With Advanced Breast Cancer Expressing HER2	https://clinicaltrials.gov/study/NCT02952729		COMPLETED	This Phase 1b trial is an open label, multi-center study of XMT-1522 administered as an intravenous infusion once every three weeks. The dose escalation part of the study will establish the maximum tolerated dose or recommended Phase 2 dose for in patients with advanced breast cancer and either a HER2 immunohistochemistry (IHC) score of at least 1+ using a validated IHC assay or with evidence of …	NO	Advanced Breast Cancer|Advanced Nonsmall Cell Lung Cancer|Advanced Gastric Cancer	DRUG: XMT-1522	Maximum tolerated dose or recommended Phase 2 dose, Evaluate adverse events and use of concomitant medication use after XMT-1522 doses, Up to 14 weeks, from the date of first dose until unacceptable side effects or a dose-limiting toxicity is met.	Time of maximum observed concentration of XMT-1522, Determine the pharmacokinetics of XMT-1522, Daily for one week after first dose; weekly until 21 days after first dose; immediately before and after and 1 week after all subsequent doses|Maximum concentration of XMT-1522, Determine the pharmacokinetics of XMT-1522, Daily for one week after first dose; weekly until 21 days after first dose; immed…		Mersana Therapeutics		ALL	ADULT, OLDER_ADULT	PHASE1	120	INDUSTRY	INTERVENTIONAL	Allocation: NA|Intervention Model: SINGLE_GROUP|Masking: NONE|Primary Purpose: TREATMENT	XMT-1522-1	2016-11-21	2019-01-28	2019-01-28	2016-11-02		2021-02-24	Moffitt Cancer Center, Tampa, Florida, 33607, United States|Massachusetts General Hospital, Boston, Massachusetts, 02114, United States|Sarah Cannon Research Institute, Nashville, Tennessee, 37203, United States|Mary Crowley Cancer Research Center, Dallas, Texas, 75230, United States|South Texas Accelerated Research Therapeutics (START), San Antonio, Texas, 78229, United States
NCT02099058	Telisotuzumab vedotin	MET	A Study Evaluating the Safety, Pharmacokinetics (PK), and Preliminary Efficacy of ABBV-399 in Participants With Advanced Solid Tumors	https://clinicaltrials.gov/study/NCT02099058		ACTIVE_NOT_RECRUITING	This is a Phase 1/1b open-label study evaluating the safety, pharmacokinetics (PK), and preliminary efficacy of ABBV-399 as monotherapy and in combination with osimertinib, erlotinib, and nivolumab in participants with advanced solid tumors likely to express c-Met. Enrollment is closed for the monotherapy arms, Arm A, and Arm D.	NO	Advanced Solid Tumors Cancer	DRUG: Osimertinib|DRUG: Nivolumab|DRUG: Telisotuzumab vedotin|DRUG: Telisotuzumab vedotin|DRUG: Erlotinib	Number of Participants with Adverse Events, An adverse event (AE) is defined as any untoward medical occurrence in a patient or clinical investigation subject administered a pharmaceutical product and which does not necessarily have a causal relationship with this treatment., Up to 24 Months|Recommended Phase 2 Dose (RPTD) of ABBV-399 when Administered as Monotherapy and in Combination with Osime…			AbbVie		ALL	ADULT, OLDER_ADULT	PHASE1	237	INDUSTRY	INTERVENTIONAL	Allocation: NON_RANDOMIZED|Intervention Model: SEQUENTIAL|Masking: NONE|Primary Purpose: TREATMENT	M14-237|2014-003154-14	2014-01-15	2024-11-16	2024-11-16	2014-03-28		2024-06-18	Scottsdale Healthcare /ID# 123761, Scottsdale, Arizona, 85258-4566, United States|City of Hope /ID# 153759, Duarte, California, 91010, United States|University of California, Los Angeles /ID# 148295, Los Angeles, California, 90095, United States|UC Irvine /ID# 165107, Orange, California, 92868, United States|University of California, Davis Comprehensive Cancer Center /ID# 129805, Sacramento, Cali…
NCT06336707	HS-20089	B7-H4	HS-20089 Combination Treatment in Subjects With Advanced Solid Tumors	https://clinicaltrials.gov/study/NCT06336707		NOT_YET_RECRUITING	HS-20089 is an investigational antibody-drug conjugate (ADC) composed of a humanized IgG1 anti-B7-H4 monoclonal antibody conjugated to the topoisomerase I inhibitor payload via a protease-cleavable linker, with an average drug-to-antibody ratio of about 6. This is a phase Ⅰ, open-label, multi-center study to evaluate the safety, tolerability, pharmacokinetics (PK) and efficacy of HS-20089 in comb…	NO	Advanced Solid Tumors	DRUG: HS-20089|DRUG: Adebrelimab|DRUG: Bevacizumab|DRUG: Cisplatin / carboplatin	Maximum tolerated dose (MTD) or maximum applicable dose (MAD) of HS-20089 in combination therapy, To determine the MTD or MAD of HS-20089 in each combination therapy., Up to day 21 from the first dose	Incidence and severity of adverse events (AEs), AEs will be graded according to the NCI Common Terminology Criteria for Adverse Events (CTCAE), Version 5.0. Incidence and severity of AEs are assessed according to vital signs, laboratory variables, physical examination, electrocardiogram, etc., From the first dose to 90 days after the end of treatment|Observed maximum plasma concentration (Cmax) o…		Hansoh BioMedical R&D Company		ALL	ADULT, OLDER_ADULT	PHASE1	1048	INDUSTRY	INTERVENTIONAL	Allocation: NON_RANDOMIZED|Intervention Model: PARALLEL|Masking: NONE|Primary Purpose: TREATMENT	HS-20089-103	2024-04-08	2026-04-08	2028-04-08	2024-03-29		2024-03-29
NCT05980416	EO-3021	Claudin 18.2	Study of EO-3021 in Adult Patients With Solid Tumors Likely to Express CLDN18.2	https://clinicaltrials.gov/study/NCT05980416		RECRUITING	This study is an open-label, international, multi-center, Phase 1 study in adult patients with solid tumors likely to express CLDN18.2.	NO	Pancreas Neoplasm|Stomach Neoplasm|Gastrointestinal Neoplasms|Digestive System Neoplasm|Neoplasms by Site|Neoplasms	DRUG: EO-3021	The incidence rate of dose limiting toxicities (DLT) during the first 21-day cycle of EO-3021 treatment, The first 21-day treatment cycle for each patient enrolled in the Escalation Phase|Number of patients with treatment emergent adverse events, From the time of informed consent, for approximately 12 months (or earlier if the participant discontinues from the study), and through Safety Follow-up…			Elevation Oncology		ALL	ADULT, OLDER_ADULT	PHASE1	120	INDUSTRY	INTERVENTIONAL	Allocation: NON_RANDOMIZED|Intervention Model: SEQUENTIAL|Masking: NONE|Primary Purpose: TREATMENT	ELVCAP-002-01	2023-08-10	2024-09-28	2024-12-28	2023-08-08		2024-07-12	Mayo Clinic, Phoenix, Arizona, 85054, United States|City of Hope, Duarte, California, 91010, United States|Johns Hopkins University - Sibley Memorial Hospital, Washington, District of Columbia, 20016, United States|Mayo Clinic, Jacksonville, Florida, 32224, United States|Sarah Cannon Research Institute at Florida Cancer Specialists, Orlando, Florida, 32827, United States|Henry Ford Cancer, Detroi…
NCT05216965	9MW2821	Nectin-4	A Clinical Study of 9MW2821 in Subjects With Advanced Malignant Solid Tumors	https://clinicaltrials.gov/study/NCT05216965		RECRUITING	This study is a Phase 1/2, first-in-human, open-label, dose-escalation and cohort expansion study designed to characterize the safety, tolerability, pharmacokinetics, preliminary antitumor activity and immunogenicity of 9MW2821 administered by intravenous (IV) infusion.	NO	Solid Tumors	DRUG: 9MW2821	Incidence of adverse events, Up to 28 days post last drug administration|Objective Response Rate (Phase 2), Defined as the percentage of subjects who experience a best response of either CR or PR. CR and PR must be confirmed ≥ 28 days later., Up to 24 months	Pharmacokinetic parameter for total antibody (TAb), antibody drug conjugate (ADC), and Monomethyl Auristatin E (MMAE), Maximum observed concentration (Cmax), 24 months|Pharmacokinetic parameter for total antibody (TAb), antibody drug conjugate (ADC), and Monomethyl Auristatin E (MMAE), Area under the concentration-time curve (AUC), 24 months|Pharmacokinetic parameter for total antibody (TAb), ant…		Mabwell (Shanghai) Bioscience Co., Ltd.		ALL	ADULT, OLDER_ADULT	PHASE1|PHASE2	208	INDUSTRY	INTERVENTIONAL	Allocation: NA|Intervention Model: SINGLE_GROUP|Masking: NONE|Primary Purpose: TREATMENT	9MW2821-2021-CP102	2022-06-11	2024-12-25	2024-12-25	2022-02-01		2022-06-15	Fudan University Shanghai Cancer Center, Shanghai, Shanghai, 200032, China
NCT03424603	STRO-001	CD74	Study of STRO-001, an Anti-CD74 Antibody Drug Conjugate, in Patients With Advanced B-Cell Malignancies	https://clinicaltrials.gov/study/NCT03424603		COMPLETED	First-in-human Phase 1 trial to study the safety, pharmacokinetics and preliminary efficacy of STRO-001 given intravenously every 3 weeks.	NO	B-cell Lymphoma|Non Hodgkin Lymphoma|Multiple Myeloma|Follicular Lymphoma|Mantle Cell Lymphoma|Diffuse Large B Cell Lymphoma|Indolent Lymphoma|B Cells--Tumors	DRUG: STRO-001	Part 1: Incidence of Treatment-Emergent Adverse Events (Safety and Tolerability of STRO-001), Incidence of adverse events (AEs) observed across STRO-001 dose levels, 18 months|Part 1: Define the recommended phase 2 dose (RP2D) and maximum tolerated dose (MTD) of STRO-001, Frequency of dose-limiting toxicity and exposure across STRO-001 dose levels, 18 months|Part 2: Evaluate preliminary anti-tumo…	Part 1: Characterize the pharmacokinetics (PK) of STRO-001 by measuring the maximum plasma concentration (Cmax), Measurement of maximum plasma concentration after the administration of STRO-001, 18 months|Part 1: Characterize the PK of STRO-001 by measuring the half-life (t1/2) of STRO-001, Measurement of terminal half-life of STRO-001 after the administration of STRO-001, 18 months|Part 1: Chara…	Part 1: Preliminary assessment of the anti-tumor activity of STRO-001 (multiple myeloma patients), Objective response rates per IMWG criteria for response assessment, 18 months|Part 1: Preliminary assessment of the anti-tumor activity of STRO-001 (NHL), Objective response rates per the Lugano classification for response assessment (NHL patients), 18 months	Sutro Biopharma, Inc.		ALL	ADULT, OLDER_ADULT	PHASE1	70	INDUSTRY	INTERVENTIONAL	Allocation: NA|Intervention Model: SINGLE_GROUP|Masking: NONE|Primary Purpose: TREATMENT	STRO-001-BCM1	2018-02-22	2024-02-15	2024-03-15	2018-02-07		2024-06-11	University of Alabama at Birmingham, Birmingham, Alabama, 35294, United States|Arizona Oncology Associates, PC--HOPE Division, Tucson, Arizona, 85711, United States|City of Hope Medical Center, Duarte, California, 91010, United States|UC Davis Comprehensive Cancer Center, Sacramento, California, 95817, United States|Univeristy of California San Francisco HDF Comprehensive Cancer Center, San Franc…
NCT05329545	Upifitamab Rilsodotin	NaPi2b	Upifitamab Rilsodotin Maintenance in Platinum-Sensitive Recurrent Ovarian Cancer (UP-NEXT)	https://clinicaltrials.gov/study/NCT05329545	UP-NEXT	TERMINATED	UP-NEXT is a double-blind, randomized, placebo-controlled study of the antibody-drug conjugate (ADC) XMT-1536 (upifitamab rilsodotin) administered as an intravenous infusion once every four weeks in patients with recurrent, platinum-sensitive high-grade serous ovarian cancer (HGSOC), including fallopian tube and primary peritoneal cancer, expressing high levels of NaPi2b.	NO	High Grade Serous Ovarian Cancer|Fallopian Tube Cancer|Primary Peritoneal Cancer	DRUG: Upifitimab rilsodotin|OTHER: Placebo	Progression-free survival (PFS) assessed by Blinded Independent Central Review (BICR) using Response Evaluation Criteria in Solid Tumors (RECIST) Version 1.1, PFS is defined as the time from randomization to the earliest date of progressive disease as assessed by BICR per RECIST Version 1.1 or death due to any cause., Up to 12 months after the last dose for the last participant.	Overall Survival (OS), OS is defined as the time from randomization to the date of death due to any cause., Up to an average of 4 years. Follow up assessments for survival data will continue every 90 days following completion of treatment.|Progression-free Survival (PFS) as assessed by Investigator using Response Evaluation Criteria in Solid Tumors (RECIST) Version 1.1, PFS is defined as the time…		Mersana Therapeutics	GOG Foundation|European Network of Gynaecological Oncological Trial Groups (ENGOT)	FEMALE	ADULT, OLDER_ADULT	PHASE3	20	INDUSTRY	INTERVENTIONAL	Allocation: RANDOMIZED|Intervention Model: PARALLEL|Masking: TRIPLE (PARTICIPANT, INVESTIGATOR, OUTCOMES_ASSESSOR)|Primary Purpose: TREATMENT	XMT-1536-3	2022-06-23	2023-09-29	2023-09-29	2022-04-15		2023-10-26	HonorHealth Research Institute - HonorHealth VGPCC Biltmore, Phoenix, Arizona, 85016, United States|The University of Arizona Cancer Center, Tucson, Arizona, 85719, United States|University of California Los Angeles, Gynecologic Oncology Clinic, Los Angeles, California, 90095, United States|University of California, Irvine Medical Center, Orange, California, 92868, United States|Sarasota Memorial…
NCT01631552	Sacituzumab Govitecan	TROP2	Study of Sacituzumab Govitecan-hziy (IMMU-132) in Adults With Epithelial Cancer	https://clinicaltrials.gov/study/NCT01631552		COMPLETED	The primary objective in Phase I is to evaluate the safety and tolerability of sacituzumab govitecan-hziy (SG) as a single agent administered in 21-day treatment cycles in previously treated participants with advanced epithelial cancer. In Phase II, the primary objective is to evaluate the safety and efficacy of sacituzumab govitecan-hziy administered in 21-day treatment cycles at a dose selected…	YES	Gastric Adenocarcinoma|Esophageal Cancer|Hepatocellular Carcinoma|Non-small Cell Lung Cancer|Small Cell Lung Cancer|Ovarian Epithelial Cancer|Carcinoma Breast Stage IV|Hormone-refractory Prostate Cancer|Head and Neck Cancers- Squamous Cell|Renal Cell Cancer|Urinary Bladder Neoplasms|Cervical Cancer|Endometrial Cancer|Glioblastoma Multiforme|Triple Negative Breast Cancer|Pancreatic Cancer	DRUG: Sacituzumab Govitecan-hziy (SG)	Percentage of Participants Experiencing Any Treatment Emergent Adverse Events and Serious Treatment Emergent Adverse Events, Treatment-emergent adverse events (TEAEs) were defined as any adverse events (AEs) that begin or worsen on or after the start of study drug through 30 days after the last dose of study drug. The severity was graded based on the National Cancer Institute's Common Terminology…	Duration of Response by ICR, Duration of Response was defined as the duration of overall response measured from the time measurement criteria are met for CR or PR (whichever is first recorded) until the first date that recurrent or progressive disease is objectively documented (taking as reference for progressive disease the smallest measurements recorded since the treatment started). Per planned…		Gilead Sciences		ALL	ADULT, OLDER_ADULT	PHASE1|PHASE2	515	INDUSTRY	INTERVENTIONAL	Allocation: NON_RANDOMIZED|Intervention Model: SEQUENTIAL|Masking: NONE|Primary Purpose: TREATMENT	IMMU-132-01	2012-12-17	2019-03-01	2020-08-13	2012-06-29	2021-04-06	2021-08-12	University of Colorado Anschutz Medical Campus, Aurora, Colorado, 080045, United States|Yale University School of Medicine, New Haven, Connecticut, 06511, United States|Helen F. Graham Cancer Center, Newark, Delaware, 19713, United States|MD Anderson Cancer Center Orlando (UF Health Cancer Center), Orlando, Florida, 32806, United States|Moffitt Cancer Center, Tampa, Florida, 33612, United States|…	Study Protocol, https://cdn.clinicaltrials.gov/large-docs/52/NCT01631552/Prot_000.pdf|Statistical Analysis Plan, https://cdn.clinicaltrials.gov/large-docs/52/NCT01631552/SAP_001.pdf
NCT04622774	IMGC936	ADAM9	First-in-Human Study of IMGC936 in Patients With Advanced Solid Tumors	https://clinicaltrials.gov/study/NCT04622774		COMPLETED	This study is a Phase 1/2, first-in-human, open-label, dose-escalation, and expansion study designed to characterize the safety, tolerability, pharmacokinetics, immunogenicity, and preliminary antitumor activity of IMGC936 administered by intravenous (IV) infusion.	NO	Advanced Solid Tumor	DRUG: IMGC936	During dose escalation measure incidence and severity of Treatment Emergent Adverse Events by CTCAE v5.0, Number of treatment emergent adverse events as assessed by CTCAE v5.0, From screening to end of study (approximately up to 2 years) for each patient|During dose escalation characterize dose-limiting toxicities (DLTs), Incidence of DLTs, DLT evaluation period is through cycle 1 (21 days)|Durin…	During dose escalation and expansion to characterize study drug concentration, Study drug concentration, There are 9 blood draw collection time points at Cycles 1 and 3, 3 blood draw time points at Cycles 2,4,5 and 6, and collection at every 3 cycles after cycle 6 until end of study (approximately up to 2 years). Each cycle is 21 days.|During dose escalation and expansion to measure the concentra…		ImmunoGen, Inc.	MacroGenics	ALL	ADULT, OLDER_ADULT	PHASE1|PHASE2	56	INDUSTRY	INTERVENTIONAL	Allocation: NA|Intervention Model: SINGLE_GROUP|Masking: NONE|Primary Purpose: TREATMENT	IMGC936-0901	2020-10-26	2023-12-31	2023-12-31	2020-11-10		2024-03-15	UCSD, La Jolla, California, 92037, United States|Sarah Cannon Research Institute, Denver, Colorado, 80218, United States|Florida Cancer Specialists, Sarasota, Florida, 34232, United States|Dana-Farber Cancer Institute, Boston, Massachusetts, 02215, United States|Washington University, Saint Louis, Missouri, 63110, United States|Stephenson Cancer Center, Oklahoma City, Oklahoma, 73104, United Stat…
NCT01270698	Labetuzumab govitecan	CEACAM5	Study of IMMU-130 in Patients With Relapsed/Refractory Colorectal Cancer	https://clinicaltrials.gov/study/NCT01270698		COMPLETED	This is a Phase I trial to study the safety of IMMU-130. IMMU-130 is composed of a drug attached to an antibody. The drug is the active ingredient in irinotecan which is a common chemotherapy drug used for colorectal cancer. Antibodies are proteins normally made by the immune system. They bind to substances that don't belong in the body to prevent harm to the body. The antibody in this study was …	NO	Metastatic Colorectal Cancer	DRUG: IMMU-130	Safety, The primary outcome measured will be safety of IMMU-130 administered at different dose levels. Safety will be assessed by reviewing the number of adverse events and overall toxicity., Safety will be measured routinely during the 6 months of administration and afterwards during follow-up for up to 5 years	efficacy, The secondary objectives are to assess pharmacokinetics and immunogenicity, and to obtain preliminary information on efficacy with this dosing schedule. Efficacy will be assessed using CT scan imaging., Efficacy will be measured every 8-12 weeks during treatment and every 6 months during the 2nd year and then annually up to 5 years thereafter.		Gilead Sciences		ALL	ADULT, OLDER_ADULT	PHASE1	26	INDUSTRY	INTERVENTIONAL	Allocation: NON_RANDOMIZED|Intervention Model: SINGLE_GROUP|Masking: NONE|Primary Purpose: TREATMENT	IM-T-IMMU-130-01	2024-05-11	2024-12-14	2024-12-14	2011-01-05		2021-08-19	Memorial Sloan-Kettering Cancer Center, New York, New York, 10065, United States
NCT05611853	STRO-001	CD74	Study of BN301, an Anti-CD74 Antibody Drug Conjugate, in Patients With Advanced B-Cell Malignancies	https://clinicaltrials.gov/study/NCT05611853		TERMINATED	Phase 1/2 trial to study the safety, pharmacokinetics and preliminary efficacy of BN301 given intravenously every 3 weeks.	NO	B-cell Lymphoma|Non Hodgkin Lymphoma|Diffuse Large B Cell Lymphoma|Follicular Lymphoma|Mantle Cell Lymphoma	DRUG: BN301	Incidence of Treatment-Related Adverse Events as Assessed by CTCAE v4.0.3, Safety and tolerability, 12 months|Objective Response Rate of participants as assessed by the Lugano 2014 criteria., Efficacy, 2 years	Maximum concentration (Cmax), Cmax of BN301 in plasma of each subject, 12 months|Time to maximum concentration (Tmax), Tmax of BN301 in plasma of each subject, 12 months|Elimination half-life (t1/2), Elimination half-life (t1/2) of BN301 in plasma of each subject, 12 months|Area under the plasma concentration-time curve (AUC0-t), Area under the plasma concentration-time curve (AUC0-t) of BN301 in…		BioNova Pharmaceuticals (Shanghai) LTD.		ALL	ADULT, OLDER_ADULT	PHASE1|PHASE2	9	INDUSTRY	INTERVENTIONAL	Allocation: NON_RANDOMIZED|Intervention Model: SEQUENTIAL|Masking: NONE|Primary Purpose: TREATMENT	BN301-101	2022-11-25	2023-12-25	2023-12-25	2022-11-10		2024-02-21	The first affiliated hospital, Zhejiang Unviersity school of medicine, Hangzhou, China|The First Affiliated School of Guangxi Medical University, Nanning, China|Shanghai Jiao Tong University School of Medicine, Ruijin Hospital, Shanghai, China|The First Affiliated Hospital of Soochow University, Suzhou, China|Union Hospital, Tongji Medical College, Huazhong University of Science and Technology, W…
NCT02312037	Gemtuzumab Ozogamicin	CD33	Expanded Access /Compassionate Use Protocol For Relapsed Or Refractory CD33 Positive AML Patients In The USA Without Access To Comparable Or Alternative Therapy	https://clinicaltrials.gov/study/NCT02312037	AML	NO_LONGER_AVAILABLE	An expanded access/compassionate use protocol that allows access to Mylotarg for relapsed/refractory AML CD33 positive patients in the USA. Contact: B1761026@iconplc.com	NO	CD33 Positive Acute Myelogenous Leukemia	BIOLOGICAL: Antibody Drug Conjugate Chemotherapeutic				Pfizer		ALL	CHILD, ADULT, OLDER_ADULT			INDUSTRY	EXPANDED_ACCESS		B1761026				2014-12-09		2019-08-20	University of Alabama at Birmingham/Children's of Alabama, Birmingham, Alabama, 35233, United States|Alaska Oncology & Hematology, LLC, Anchorage, Alaska, 99508-2980, United States|Providence Alaska Medical Center, Anchorage, Alaska, 99508, United States|Providence Cancer Center, Anchorage, Alaska, 99508, United States|Banner Pediatric Specialists Hematology/Oncology Clinic, Mesa, Arizona, 85202,…
NCT01915472	Labetuzumab govitecan	CEACAM5	A Phase II Study of IMMU 130 in Patients With Metastatic Colorectal Cancer	https://clinicaltrials.gov/study/NCT01915472		WITHDRAWN	This is a Phase II trial to study the safety and efficacy of IMMU-130. IMMU-130 is composed of a drug attached to an antibody. The drug is the active ingredient in irinotecan which is a common chemotherapy drug used for colorectal cancer. Antibodies are proteins normally made by the immune system. They bind to substances that don't belong in the body to prevent harm to the body. The antibody in t…	NO	Metastatic Colorectal Cancer	DRUG: IMMU 130	Safety, The primary outcome measured will be safety of IMMU-130 administered at different dose levels. Safety will be assessed by reviewing the number of adverse events and overall toxicity., Safety will be measured routinely during the 6 months of administration and afterwards during follow-up for up to 5 years	Assess PK, The secondary objectives are to assess pharmacokinetics and immunogenicity, and to obtain preliminary information on efficacy with this dosing schedule. Efficacy will be assessed using CT scan imaging., Efficacy will be measured every 8 weeks during treatment and every 3 months during the 1st year and then every 6 months up to 5 years thereafter.		Gilead Sciences		ALL	ADULT, OLDER_ADULT	PHASE2	0	INDUSTRY	INTERVENTIONAL	Allocation: RANDOMIZED|Intervention Model: SINGLE_GROUP|Masking: NONE|Primary Purpose: TREATMENT	IMMU 130-03	2024-09-13	2024-08-15	2024-08-15	2013-08-05		2021-08-19
NCT01605318	Labetuzumab govitecan	CEACAM5	Study of Labetuzumab Govitecan in Participants With Metastatic Colorectal Cancer	https://clinicaltrials.gov/study/NCT01605318		TERMINATED	The goal of this clinical study is to determine the dosing and safety of labetuzumab govitecan (formerly known as IMMU-130; hMN-14-SN38, antibody-drug conjugate) in participants with colorectal cancer.	NO	Metastatic Colorectal Cancer|Colon Cancer|Rectal Cancer	DRUG: Labetuzumab Govitecan (LG)	Percentage of Participants With Adverse Events and Serious Adverse Events (SAEs), From first dose date up to approximately 2 years after the last dose or until disease progression|Percentage of Participants With Laboratory Abnormalities, From first dose date up to approximately 2 years after the last dose or until disease progression	Duration of Response, Duration of response (DOR) is defined as the interval from the first documentation of PR or CR to the earlier of the first documentation of disease progression (PD) or death from any cause., From first documentation of PR or CR to the earlier of the first documentation of PD or death from any cause (Up to approximately 2 years after the last dose or until disease progression…		Gilead Sciences		ALL	ADULT, OLDER_ADULT	PHASE1|PHASE2	92	INDUSTRY	INTERVENTIONAL	Allocation: NON_RANDOMIZED|Intervention Model: SEQUENTIAL|Masking: NONE|Primary Purpose: TREATMENT	IMMU-130-02	2013-02-12	2017-01-03	2017-01-03	2012-05-24		2024-01-24	UCLA Jonsson Comprehensive Cancer Center, Santa Monica, California, 90404, United States|University of Colorado Anschutz Medical Campus, Aurora, Colorado, 80045, United States|Helen F. Graham Cancer Center-Christiana Care, Newark, Delaware, 19713, United States|IUHealth Goshen Center for Cancer Care, Goshen, Indiana, 46526, United States|The Ohio State University Comprehensive Cancer Center, Colu…
NCT06233942	BG-C9074	B7-H4	Study of BG-C9074 as Monotherapy and in Combination With Tislelizumab in Participants With Advanced Solid Tumors	https://clinicaltrials.gov/study/NCT06233942		RECRUITING	This is a first-in-human, dose finding and dose expansion study to evaluate the safety, tolerability, pharmacokinetics (PK), pharmacodynamics, and preliminary antitumor activity of BG-C9074 alone and in combination with tislelizumab in participants with advanced solid tumors. Participants will receive study drug(s) until progressive disease, unacceptable toxicity, withdrawal of consent, death, or…	NO	Advanced Solid Tumor	DRUG: BG-C9074|DRUG: Tislelizumab	Phase 1a: Number of Participants with Adverse Events (AEs) and Serious Adverse Events (SAEs), Number of participants with AEs and SAEs, including findings from physical examinations, electrocardiograms (ECGs), laboratory assessments, and that meet protocol-defined dose-limiting toxicity criteria., Approximately 3 years|Phase 1a: Maximum Tolerated Dose (MTD) or Maximum Administered Dose (MAD) of B…	Phase 1a: ORR, ORR is defined as the percentage of participants with best overall response (BOR) of complete response (CR) or partial response (PR) assessed by the investigator using RECIST v1.1., Approximately 3 years|Duration of Response (DOR), DOR is defined as the time from the first determination of an objective response per RECIST v1.1 until the first documentation of disease progression or…		BeiGene		ALL	ADULT, OLDER_ADULT	PHASE1	150	INDUSTRY	INTERVENTIONAL	Allocation: NON_RANDOMIZED|Intervention Model: PARALLEL|Masking: NONE|Primary Purpose: TREATMENT	BG-C9074-101|2023-509958-65-00	2024-04-12	2027-09-28	2027-09-28	2024-01-31		2024-06-06	Macquarie University, North Ryde, New South Wales, 2109, Australia|Cancer Care Wollongong, Wollongong, New South Wales, 2500, Australia|Peter Maccallum Cancer Centre, Melbourne, Victoria, 3000, Australia|Linear Clinical Research, Nedlands, Western Australia, 6009, Australia
NCT05525286	SOT102	Claudin 18.2	Clinical Trial of SOT102 Antibody Drug Conjugate in Patients With Advanced Gastric and Pancreatic Adenocarcinoma	https://clinicaltrials.gov/study/NCT05525286	CLAUDIO-01	RECRUITING	This trial will assess the MTD and RP2D of SOT102 administered as monotherapy (Part A) and in combination with first-line SoC treatment (nab-paclitaxel/ gemcitabine; Part B) and efficacy of SOT102 administered as monotherapy (Part C) and in combination with first-line SoC treatment (Part D) in patients with advanced or metastatic pancreatic adenocarcinoma.	NO	Pancreatic Cancer	DRUG: SOT102	Parts A and B: The definition of the maximum tolerated dose (MTD) and recommended phase 2 dose (RP2D) of SOT102 given as monotherapy and in combination with first-line SoC treatment, MTD is defined as the highest dose level tested below the dose level associated with ≥33% of dose-limiting toxicity (DLT)-evaluable patients experiencing a DLT. The RP2D will be selected based on evaluation of the to…	Parts A and B (monotherapy and combination with SoC): Number of participants with DLTs, Adverse events (AEs) graded according to the National Cancer Institute's Common Terminology Criteria for Adverse Events (NCI CTCAE) version 5.0 considered DLTs: All grade 5 events not clearly related to disease progression or any other causes; Any grade 3 or higher non-hematologic toxicity regardless of durati…	Parts C and D (monotherapy and combination with SoC): Relationship between the intensity of CLDN18.2 expression and clinical outcome, Correlation between the intensity of CLDN18.2 expression determined by immunohistochemistry staining, and clinical outcome, determined by disease response as per RECIST 1.1 criteria and OS, From Day 1 of Cycle 1 until the end of SOT102 treatment, assessed up to app…	SOTIO Biotech a.s.		ALL	ADULT, OLDER_ADULT	PHASE1|PHASE2	160	INDUSTRY	INTERVENTIONAL	Allocation: NA|Intervention Model: SINGLE_GROUP|Masking: NONE|Primary Purpose: TREATMENT	SN201|2021-005873-25|2023-504441-31-00	2022-03-31	2024-12-27	2024-06-28	2022-09-01		2024-05-28	Washington University School of Medicine in St. Louis, Saint Louis, Missouri, 63110, United States|Cleveland Clinic Main Campus, Cleveland, Ohio, 44195, United States|Institut Jules Bordet, Brussels, Belgium|Universitair Ziekenhuis Leuven - Campus Gasthuisberg, Leuven, Belgium|Masaryk?v Onkologicky ústav, Brno, Czechia|Institut Gustave Roussy, Paris, France|VHIO - Vall d'Hebron Institut d'Oncolog…
NCT04235101	Trastuzumab Duocarmazine	ERBB2	Phase I Study of SYD985 With Niraparib in Patients With Solid Tumors	https://clinicaltrials.gov/study/NCT04235101		COMPLETED	SYD985.004 is a two-part phase I study with the antibody-drug conjugate SYD985 in combination with niraparib aimed at evaluating safety, pharmacokinetics and efficacy in patients with HER2-expressing locally advanced or metastatic solid tumours.	NO	Solid Tumor	DRUG: SYD985 + Niraparib	Incidence of dose-limiting toxicities, First cycle, 21 days	Number of patients with adverse events, up to 2 years|Area under the plasma concentration versus time curve (AUC) of SYD985 and niraparib, Baseline, Days 1,8,15 of Cycle 1, Days 1,8,15 of Cycle 2, Day 1 of subsequent cycles up to 6 months|Peak plasma concentration of SYD985 and niraparib, Baseline, Days 1,8,15 of Cycle 1, Days 1,8,15 of Cycle 2, Day 1 of subsequent cycles up to 6 months|Change fr…		Byondis B.V.		ALL	ADULT, OLDER_ADULT	PHASE1	32	INDUSTRY	INTERVENTIONAL	Allocation: NA|Intervention Model: SINGLE_GROUP|Masking: NONE|Primary Purpose: TREATMENT	SYD985.004	2020-06-22	2023-04-24	2023-04-24	2020-01-21		2024-01-05	University Hospital Antwerp, BE, Antwerp, 2650, Belgium|Institut Jules Bordet, Brussel, 1000, Belgium|Radboud University Medical Center/ NL, Nijmegen, 6500 HB, Netherlands|The Royal Marsden NHS Foundation Trust, London, SM2 5PT, United Kingdom|The Christie NHS Foundation Trust/ UK, Manchester, M20 4BX, United Kingdom|The Newcastle upon Tyne Hospitals NHS Foundation Trust/UK, Newcastle, NE7 7DN, U…
NCT04147819	BAY2701439	ERBB2	A First in Human Study of BAY2701439 to Look at Safety, How the Body Absorbs, Distributes and Excretes the Drug, and How Well the Drug Works in Participants With Advanced Cancer Expressing the HER2 Protein	https://clinicaltrials.gov/study/NCT04147819		COMPLETED	In this study, researchers want to learn about the safety of drug BAY2701439 and how well the drug works in patients with advanced cancer that has the protein HER2 (Human Epidermal growth factor Receptor 2) and cannot be cured by currently available treatment options. The study will include patients with HER2 expressing breast, gastric (stomach) or gastroesophageal (stomach and esophagus) cancer,…	NO	Cancers With HER2 Expression	DRUG: BAY2701439|DRUG: BAY2701439	Dose escalation: Incidence of TEAEs including TESAEs, TEAE: Treatment-emergent adverse event TESAE: Treatment-emergent serious adverse event, After first administration of study intervention up to 42 days after the last dose of study intervention|Dose escalation: Severity of TEAEs including TESAEs, After first administration of study intervention up to 42 days after the last dose of study interve…	Dose escalation: Recommended dose level(s) of BAY2701439 for the dose expansion cohorts, The dose level(s) recommended for the dose expansion cohorts will be defined after evaluation of incidence and severity of TEAEs, PK, and ORR by RECIST 1.1, collected in the cycles of treatment during the dose escalation part of the study., Maximum 6 cycles (each cycle is 42 days)|Dose escalation: Recommended…		Bayer		ALL	ADULT, OLDER_ADULT	PHASE1	14	INDUSTRY	INTERVENTIONAL	Allocation: NON_RANDOMIZED|Intervention Model: SEQUENTIAL|Masking: NONE|Primary Purpose: TREATMENT	19829|2019-001741-40	2020-07-02	2023-08-21	2023-09-26	2019-11-01		2023-10-18	Johns Hopkins Hospital/Health System, Baltimore, Maryland, 21287, United States|Washington University School of Medicine, Saint Louis, Missouri, 63110, United States|Memorial Sloan-Kettering Cancer Center, New York, New York, 10022, United States|University of Texas MD Anderson Cancer Center, Houston, Texas, 77030, United States|Southampton General Hospital, Southampton, Hampshire, SO16 6YD, Unit…
NCT05773937	9MW2821	Nectin-4	A Clinical Study of 9MW2821 in Advanced Malignant Solid Tumors	https://clinicaltrials.gov/study/NCT05773937		RECRUITING	This study is a Phase 1, first-in-human, open-label, dose-escalation and cohort expansion study designed to characterize the safety, tolerability, pharmacokinetics, preliminary antitumor activity and immunogenicity of 9MW2821 administered by intravenous (IV) infusion.	NO	Advanced Malignant Solid Tumors	DRUG: 9MW2821	Incidence of adverse events, Up to 28 days post last drug administration	Pharmacokinetic parameter：total antibody (TAb), antibody drug conjugate (ADC), and Monomethyl Auristatin E (MMAE), Maximum observed concentration (Cmax), 24 months|Pharmacokinetic parameter：total antibody (TAb), antibody drug conjugate (ADC), and Monomethyl Auristatin E (MMAE), Area under the concentration-time curve (AUC), 24 months|Pharmacokinetic parameter：total antibody (TAb), antibody drug c…		Mabwell (Shanghai) Bioscience Co., Ltd.		ALL	ADULT, OLDER_ADULT	PHASE1	40	INDUSTRY	INTERVENTIONAL	Allocation: NA|Intervention Model: SINGLE_GROUP|Masking: NONE|Primary Purpose: TREATMENT	9MW2821-2021-CP101	2022-06-21	2024-12-31	2024-12-31	2023-03-17		2023-03-17	Beijing Cancer Hospital, Beijing, Beijing, 100142, China|Beijing University Cancer Hospital, Beijing, Beijing, 100142, China
NCT04441099	NBE-002	ROR1	NBE-002 in Patients With Advanced Solid Tumors	https://clinicaltrials.gov/study/NCT04441099		TERMINATED	This first-in-human study will evaluate the recommended dose for further clinical development, safety, tolerability, anti-tumor activity, immunogenicity, pharmacokinetics and pharmacodynamics of NBE-002, a novel anti-ROR1 antibody-drug conjugate, in patients with advanced solid tumors.	NO	Advanced Solid Tumor|Advanced Cancer|Triple Negative Breast Cancer	DRUG: NBE-002	Recommended Phase 2 Dose (RP2D) (Phase 1), The RP2D will be determined using dose limiting toxicities (DLTs) and all other available study data, Up to 48 months|Anti-tumor Activity (Phase 2), Anti-tumor activity will be assessed by Response Evaluation Criteria in Solid Tumours (RECIST) v1.1, Up to 60 months	Incidence of Adverse Events (Safety and Tolerability), Safety and tolerability profile will be assessed by Common Terminology Criteria for Adverse Events v5.0 and summarized by type, frequency, and severity of adverse events, Up to 60 months|Preliminary Anti-tumor Activity (Phase 1), Preliminary anti-tumor activity will be assessed by Response Evaluation Criteria in Solid Tumours (RECIST) v1.1, U…		NBE-Therapeutics AG	Cmed Clinical Services	ALL	ADULT, OLDER_ADULT	PHASE1|PHASE2	12	INDUSTRY	INTERVENTIONAL	Allocation: NON_RANDOMIZED|Intervention Model: SEQUENTIAL|Masking: NONE|Primary Purpose: TREATMENT	NBE-002-01	2020-06-19	2023-08-14	2023-08-14	2020-06-22		2023-09-07	Sarah Cannon Research Institute - TN Oncology, Nashville, Tennessee, 37203, United States|The University of Texas MD Anderson Cancer Center, Houston, Texas, 77030, United States|NEXT Oncology, San Antonio, Texas, 78229, United States
NCT02512237	BAY2701439	ERBB2	A Dose-escalation Study of ARX788, IV Administered in Subjects With Advanced Cancers With HER2 Expression	https://clinicaltrials.gov/study/NCT02512237		TERMINATED	This is a 2-part, Phase 1 FIH study with Phase 1a designed to determine the maximum tolerated dose (MTD)/recommended Phase 2 dose (RP2D) in subjects with metastatic cancers with a human epidermal growth factor receptor 2 (HER2) test result that is in situ hybridization (ISH) positive (+) or immunohistochemistry (IHC) 3+ or 2+, and Phase 1b designed to assess anticancer activity and safety in thre…	NO	Breast Neoplasms|Stomach Neoplasms	DRUG: ARX788	Maximum tolerated dose of ARX788, Determine highest dose level at which less than 2 of 6 subjects experience a dose limiting toxicity., 12 months	Number of subjects with Adverse Events, Safety and tolerability of ARX788 as measured by all adverse events, hematology, blood chemistry, vital signs, electrocardiogram, and physical exam., 30 months|Area under the plasma concentration versus time curve (AUC) of ARX788 after infusion, Pharmakokinetic characteristics of ARX788 for infusion Cycle 1 and Cycle 3, 30 months|Half-life of ARX788 after i…		Zhejiang Medicine Co., Ltd.	Ambrx, Inc.	ALL	ADULT, OLDER_ADULT	PHASE1	9	INDUSTRY	INTERVENTIONAL	Allocation: NON_RANDOMIZED|Intervention Model: PARALLEL|Masking: NONE|Primary Purpose: TREATMENT	ZMC-ARX788-101|Universal Trial Number (UTN)	2024-03-16	2024-01-17	2024-01-17	2015-07-30		2020-06-05	Mater Adult Hospital, South Brisbane, Queensland, 4101, Australia|Princess Alexandra Hospital, Woolloongabba, Queensland, 4102, Australia|Monash Medical Centre, Clayton, Victoria, 3168, Australia|Epworth Healthcare, Richmond, Victoria, 3121, Australia|Auckland City Hospital, Grafton, Auckland, 1023, New Zealand|Wellington Hospital, Newtown, Wellington, 6022, New Zealand|Christchurch Hospital, Chr…
NCT00070837	MLN2704	PSMA	MLN2704 in Subjects With Metastatic Androgen-Independent Prostate Cancer	https://clinicaltrials.gov/study/NCT00070837		COMPLETED	The purpose of the study is to determine the highest dose of MLN2704 that can be given multiple times safely to patients with prostate cancer, and to identify any side effects associated with taking the drug. This study will also evaluate how MLN2704 is taken up, broken down and eliminated by the body.	NO	Prostatic Neoplasms	DRUG: MLN2704 (DM1 conjugated monoclonal antibody MLN591)				Millennium Pharmaceuticals, Inc.		MALE	ADULT, OLDER_ADULT	PHASE1|PHASE2	46	INDUSTRY	INTERVENTIONAL	Allocation: NON_RANDOMIZED|Intervention Model: PARALLEL|Masking: NONE|Primary Purpose: TREATMENT	M59102-051	2024-10-03		2024-10-04	2003-10-13		2007-07-13	Memorial Sloan-Kettering Cancer Center, New York, New York, 10021, United States|Weill Medical College of Cornell University/ New York Presbyterian Hospital, New York, New York, 10021, United States|Duke University Medical Center, Box 3532, Durham, North Carolina, 27710, United States|Cleveland Clinic, Taussig Cancer Center, Cleveland, Ohio, 44195, United States
NCT03859752	TR1801-ADC	MET	TR1801-ADC in Patients With Tumors That Express c-Met	https://clinicaltrials.gov/study/NCT03859752		SUSPENDED	First-in-human, Phase 1 study to assess safety, tolerability, and pharmacokinetics of TR1801-ADC in patients with select solid tumors that express c-Met.	NO	Unspecified Adult Solid Tumor, Protocol Specific	BIOLOGICAL: TR1801-ADC	Characterize safety of TR1801-ADC in patients with advanced solid tumor malignancies which express c-Met, Number of participants with treatment-related adverse events, 4 years|Establish maximum tolerated dose, Number of participants with protocol-defined dose-limiting toxicity, 3.5 years	Evaluate pharmacokinetics of TR1801-ADC, Analyze blood plasma concentrations, 4 years|Immunogenicity, Assess anti-drug antibodies of TR1801-ADC, 4 years|Evaluate clinical activity of TR1801-ADC, Assess objective response rate in accordance with Response Evaluation Criteria in Solid Tumors (RECIST V1.1), 5 years		Open Innovation Partners, Inc.		ALL	ADULT, OLDER_ADULT	PHASE1	15	INDUSTRY	INTERVENTIONAL	Allocation: NA|Intervention Model: SINGLE_GROUP|Masking: NONE|Primary Purpose: TREATMENT	TR1801-CL-01	2019-08-14	2023-07-04	2023-12-31	2019-03-01		2023-09-22	University of Southern California Norris Comprehensive Cancer Center, Los Angeles, California, 90033, United States|University of Colorado, Aurora, Colorado, 80045, United States|John Hopkins - Sidney Kimmel Comprehensive Cancer Center, Baltimore, Maryland, 21287, United States|University of Washington / Seattle Cancer Care, Seattle, Washington, 98109, United States
NCT03449030	TAK-164	GCC	A Study of TAK-164 in Participants With Advanced Gastrointestinal (GI) Cancer Expressing Guanylyl Cyclase C (GCC)	https://clinicaltrials.gov/study/NCT03449030		TERMINATED	The purpose of this study is to evaluate the safety of TAK-164 and to determine the maximum tolerated dose (MTD) and/or recommended phase 2 dose (RP2D) and schedule.	YES	Gastrointestinal Neoplasms; Esophageal, Stomach, Pancreas, Colon Neoplasms; Malignant Tumors of Digestive Organ; Advanced Gastrointestinal Malignancies	DRUG: TAK-164|DRUG: 89Zr-TAK-164	Number of Participants With Dose-limiting Toxicities (DLTs), DLTs were evaluated according to National Cancer Institute Common Terminology Criteria for Adverse Events (NCI CTCAE), version 5. DLT was defined as any of the following adverse events (AEs) that occurred and were considered by the investigator to be related to therapy with study drug: hematologic toxicities were, Grade 4 neutropenia (a…	Cmax: Maximum Observed Plasma Concentration for TAK-164, Cycles 1 and 2 Day 1 pre-dose and at multiple time points (up to 336 hours) post-dose (Cycle length = 21 days)|Tmax: Time to Reach the Maximum Observed Plasma Concentration (Cmax) for TAK-164, Cycles 1 and 2 Day 1 pre-dose and at multiple time points (up to 336 hours) post-dose (Cycle length = 21 days)|AUClast: Area Under the Plasma Concent…		Millennium Pharmaceuticals, Inc.		ALL	ADULT, OLDER_ADULT	PHASE1	31	INDUSTRY	INTERVENTIONAL	Allocation: NON_RANDOMIZED|Intervention Model: SEQUENTIAL|Masking: NONE|Primary Purpose: OTHER	TAK-164-1001|U1111-1207-9923|2018-002214-12	2018-04-23	2020-02-27	2020-02-27	2018-02-28	2021-03-22	2021-03-22	University of Colorado Cancer Center, Aurora, Colorado, 80045, United States|Moffitt Cancer Center, Tampa, Florida, 33612, United States|Massachusetts General Hospital, Boston, Massachusetts, 02114-2621, United States|SCRI - Tennessee Oncology Nashville - Southern Hills Clinic, Nashville, Tennessee, 37205, United States	Study Protocol, https://cdn.clinicaltrials.gov/large-docs/30/NCT03449030/Prot_000.pdf|Statistical Analysis Plan, https://cdn.clinicaltrials.gov/large-docs/30/NCT03449030/SAP_001.pdf
NCT06265727	CRB-701	Nectin-4	A Phase 1/2 Study to Investigate CRB-701 in Solid Tumors	https://clinicaltrials.gov/study/NCT06265727		RECRUITING	The goal of this clinical trial is to define a safe and effective dose of CRB-701 for participants with solid tumors that are expressing a protein called nectin-4. The main questions it aims to answer are: What is the the safe and effective dose of CRB-701 when used alone? What cancers can be treated effectively with CRB-701? Participants will be asked to attend clinic and be given a intravenous …	NO	Solid Tumor, Adult	DRUG: CRB-701	Part A: To confirm the safety and tolerability and determine MTD and PADR for CRB-701, Occurrence of Dose Limiting Toxicities as defined in the protocol, 21 days|Part B & C : To evaluate efficacy in terms of Disease Control Rate (DCR), DCR is the sum of percentage of participants meeting the definition of Complete Response (CR), Partial Response (PR) or Stable Disease (SD) for at least 4 months u…	Parts A, B, % C: To characterize the safety profile of CRB-701, Numbers of treatment emergent adverse events with severity determined using NCI CTCAE v5.0 after single or multiple doses of CRB-701 or single and multiple doses of CRB-701 and an anti-PD-(L)1 therapy, Up to 6 months|Maximum observed plasma concentration of CRB-701 [total ADC] (Cmax), Maximum observed plasma concentration of total AD…		Corbus Pharmaceuticals Inc.	CSPC Zhongnuo Pharmaceutical (Shijiazhuang) Co., Ltd.	ALL	ADULT, OLDER_ADULT	PHASE1|PHASE2	420	INDUSTRY	INTERVENTIONAL	Allocation: RANDOMIZED|Intervention Model: SEQUENTIAL|Masking: NONE|Primary Purpose: TREATMENT	CRB-701-01	2024-04-01	2027-01-16	2027-01-27	2024-02-20		2024-05-13	City of Hope Cancer Center, Duarte, California, 91010, United States|Moores Cancer Centre at UC San Diego Health, San Diego, California, 92037, United States|Helen Diller Family Comprehensive Cancer Center - UCSF, San Francisco, California, 94115, United States|Rocky Mountain Cancer Centres, Denver, Colorado, 80218, United States|Yale Cancer Center, New Haven, Connecticut, 06510, United States|Fl…
NCT05720117	PYX-201	FN1	Study of PYX-201 in Solid Tumors	https://clinicaltrials.gov/study/NCT05720117		RECRUITING	The primary objective of this study is to determine the recommended dose(s) of PYX-201 for participants with relapsed/refractory (R/R) solid tumors.	NO	Solid Tumor|Advanced Solid Tumor	DRUG: PYX-201	Number of Participants who Experience a Dose-limiting Toxicity (DLT), DLT is defined as (1) an adverse event (AE) or abnormal laboratory value assessed as unrelated to disease, disease progression, intercurrent illness, or concomitant medications that occurs after the treatment with PYX-201 and (2) meets any of the predefined criteria outlined in the protocol., Day 1 to Day 21|Number of Participa…	Maximum Observed Concentration (Cmax) of PYX-201 Antibody-drug Conjugate, Total Antibody, Free Payload and Associated Metabolites in Serum, Day 1 up to approximately 2 years|Time to Maximum Concentration (tmax) of PYX-201 Antibody-drug Conjugate, Total Antibody, Free Payload and Associated Metabolites in Serum, Day 1 up to approximately 2 years|Clearance (CL) of PYX-201 Antibody-drug Conjugate, T…		Pyxis Oncology, Inc		ALL	ADULT, OLDER_ADULT	PHASE1	45	INDUSTRY	INTERVENTIONAL	Allocation: NA|Intervention Model: SINGLE_GROUP|Masking: NONE|Primary Purpose: TREATMENT	PYX-201-101|2022-002284-30	2023-03-14	2024-05-24	2024-07-26	2023-02-09		2024-03-22	HonorHealth Research Institute, Scottsdale, Arizona, 85258, United States|SCRI - HealthOne Denver, Denver, Colorado, 80218, United States|SCRI - Florida Cancer Specialists, Sarasota, Florida, 34232, United States|University of Chicago Medicine, Chicago, Illinois, 60637, United States|Massachusetts General Hospital, Boston, Massachusetts, 02114, United States|Washington University School of Medici…
NCT01414296	BAY2701439	ERBB2	Extended Study of Prostate-specific Membrane Antigen Antibody-Drug Conjugate in Subjects With Prostate Cancer	https://clinicaltrials.gov/study/NCT01414296		COMPLETED	Prostate-specific Membrane Antigen Antibody-Drug Conjugate (PSMA ADC) 1301EXT is an open-label, nonrandomized, phase 1 extension study of PSMA ADC administered IV in subjects with progressive CMPC that has progressed after prior taxane therapy. Subjects who have participated in PSMA ADC 1301 and who, in the opinion of the PI, are likely to benefit from continued treatment with PSMA ADC will be en…	NO	Prostate Cancer	DRUG: PSMA ADC	Number of subjects with Adverse Events, Safety and tolerability of PSMA ADC as measured by all adverse events, hematology, blood chemistry, and urine values, vital signs, electrocardiogram, and physical exam., 39 weeks			Progenics Pharmaceuticals, Inc.		MALE	ADULT, OLDER_ADULT	PHASE1	10	INDUSTRY	INTERVENTIONAL	Allocation: NON_RANDOMIZED|Intervention Model: SINGLE_GROUP|Masking: NONE|Primary Purpose: TREATMENT	PSMA ADC 1301EXT	2024-01-09	2024-09-13	2024-11-13	2011-08-11		2013-11-14	Progenics Pharmaceuticals, Inc., Tarrytown, New York, 10591, United States
NCT06422520	BGB-C354	CD276	Phase 1 First-in-Human Study of BGB-C354 Alone and in Combination With Tislelizumab in Participants With Advanced Solid Tumors	https://clinicaltrials.gov/study/NCT06422520		NOT_YET_RECRUITING	This is a first-in-human, Phase 1a/1b study to evaluate the safety, tolerability, pharmacokinetics, and preliminary antitumor activity of BGB-C354 alone and in combination with tislelizumab in participants with advanced solid tumors. Study details include: * The study will be conducted in 2 phases: Phase 1a (Monotherapy Dose Escalation and Safety Expansion) and Phase 1b (Dose Expansion). * The vi…	NO	Advanced Solid Tumor	DRUG: BGB-C354|DRUG: Tislelizumab	Phase 1a: Number of Participants with Adverse Events (AEs) and Serious Adverse Events (SAEs), Number of participants with AEs and SAEs characterized by type, frequency, severity (as graded by the National Cancer Institute- Common Terminology Criteria for Adverse Events Version 5.0 \[NCI-CTCAE v 5.0\]), timing, seriousness, and relationship to study drug(s); physical examinations; electrocardiogra…	Phase 1a: ORR, ORR is defined as the percentage of participants with best overall response (BOR) of complete response (CR) or partial response (PR) assessed by the investigator using RECIST v1.1., Up to approximately 2 years|Duration of Response (DOR), DOR is defined as the time from the first determination of an objective response per RECIST v1.1 until the first documentation of disease progress…		BeiGene		ALL	ADULT, OLDER_ADULT	PHASE1	62	INDUSTRY	INTERVENTIONAL	Allocation: NON_RANDOMIZED|Intervention Model: PARALLEL|Masking: NONE|Primary Purpose: TREATMENT	BGB-C354-101|2024-513280-11-00	2024-06-24	2026-11-30	2026-11-30	2024-05-21		2024-05-21
NCT05601401	Disitamab vedotin	ERBB2	Phase II Study of RC48-ADC in Treating Patients With Salivary Gland Tumors Expressing HER2	https://clinicaltrials.gov/study/NCT05601401		RECRUITING	The goal of this clinical trial is to learn about the efficacy and safety of RC48-ADC, a HER2-targeting antibody-drug conjugate, in patients with HER2-positive and HER2-low expressing advanced or metastatic salivary cancer.	NO	Salivary Gland Tumors	DRUG: RC48-ADC	Progression-free Survival (PFS), Tumor response was assessed by investigator according to RECIST v1.1., From date of randomization until the date of first documented progression or date of death from any cause, whichever came first. Assessed up to 24 months.	Objective Response Rate （ORR）, Objective Response Rate was defined as the percentage of participants with a complete response (CR) or partial response (PR)., From date of randomization until the date of first documented progression or date of death from any cause, whichever came first. Assessed up to 24 months.|Overall Survival (OS), OS was defined as the time from the date of randomization to th…		Peking Union Medical College Hospital		ALL	ADULT, OLDER_ADULT	PHASE2	10	OTHER	INTERVENTIONAL	Allocation: NA|Intervention Model: SINGLE_GROUP|Masking: NONE|Primary Purpose: TREATMENT	RCVDORIIR002	2022-03-31	2023-03-31	2023-12-31	2022-11-01		2022-11-01	Peking Union Medical College Hospital, Beijing, Beijing, 100000, China
NCT05308225	BAY2701439	ERBB2	Study to Assess Anti-CD38 Antibody Drug Conjugate in Relapsed or Refractory Multiple Myeloma	https://clinicaltrials.gov/study/NCT05308225		ACTIVE_NOT_RECRUITING	This is a two-stage phase 1b/2a, open-label, multicenter, dose-escalation study of STI-6129 administered intravenously once in a 4-week cycle in subjects with relapsed or refractory multiple myeloma.	NO	Multiple Myeloma	BIOLOGICAL: STI-6129	Safety of STI-6129, Safety as assessed by incidence of adverse events (AEs), severe AEs (SAEs), DLTs, neurotoxicity and laboratory abnormalities using the Common Terminology Criteria for Adverse Events (CTCAE Version 5), Baseline through study completion at up to approximately 24 months	Measuring Pharmacokinetic [PK] Profile, STI-6129 blood plasma concentrations will be measured for the total antibody plus conjugated toxin (STI 6129) and the free toxin, Baseline through study completion at up to approximately 24 months|Overall response and duration, Response and duration determined according to the International Myeloma Working Group (IMWG) response criteria, Baseline through st…		Sorrento Therapeutics, Inc.		ALL	ADULT, OLDER_ADULT	PHASE1|PHASE2	72	INDUSTRY	INTERVENTIONAL	Allocation: NA|Intervention Model: SEQUENTIAL|Masking: NONE|Primary Purpose: TREATMENT	38ADC-RRMM-101	2023-02-01	2024-12-25	2024-07-26	2022-04-04		2023-04-12	NYU Lagone Health, New York, New York, 10016, United States|Columbia University Medical Center, New York, New York, 10032, United States|Gabrail Cancer Center, Canton, Ohio, 44718, United States
NCT03696771	NJH395	ERBB2	Study to Determine Safety and Dose of NJH395 in Non-breast HER2+ Advanced Cancer	https://clinicaltrials.gov/study/NCT03696771		COMPLETED	A first-in-human study using NJH395 in non-breast HER2-positive advanced malignancies	NO	NON-breast HER2+ Malignancies	DRUG: NJH395	Incidence and severity of dose limiting toxicities (DLTs), The time frame will expand to 42 days for the second part of the study, 21 days|Number of participants with Adverse Events, 2.5 years	Concentration versus time profiles for NJH395 and its catabolite, 126 days|PK parameter (Cmax) for NJH395, 126 days|Pharmacokinetic (PK) parameter (AUC) for NJH395, 126 days|Incidence of anti-NJH395 antibodies and neutralizing antibodies to trastuzumab, 126 days|Overall Response Rate, Response assessed by RECIST v1.1 and iRECIST, 2.5 years|Clinical Benefit Rate (CBR), Response assessed by RECIST …		Novartis Pharmaceuticals		ALL	ADULT, OLDER_ADULT	PHASE1	18	INDUSTRY	INTERVENTIONAL	Allocation: NA|Intervention Model: SINGLE_GROUP|Masking: NONE|Primary Purpose: TREATMENT	CNJH395X2101	2018-12-27	2020-10-19	2020-10-19	2018-10-05		2022-02-04	University of Texas MD Anderson Cancer Center, Houston, Texas, 77030, United States|Novartis Investigative Site, Milano, MI, 20162, Italy|Novartis Investigative Site, Kashiwa, Chiba, 277 8577, Japan|Novartis Investigative Site, Seoul, 03080, Korea, Republic of
NCT05372614	Trastuzumab deruxtecan	ERBB2	Testing the Safety and Tolerability of the Anti-cancer Drugs Trastuzumab Deruxtecan and Neratinib for Cancers With Changes in the HER2 Gene	https://clinicaltrials.gov/study/NCT05372614		RECRUITING	This phase I trial tests the safety, side effects, and best dose of neratinib in combination with trastuzumab deruxtecan in treating patients with solid tumors that have spread to other parts of the body (metastatic) or that cannot be removed by surgery (unresectable), and have changes in a gene called human epidermal growth factor receptor 2 (HER2). Neratinib is in a class of medications called …	NO	Malignant Solid Neoplasm	PROCEDURE: Biopsy|PROCEDURE: Biospecimen Collection|PROCEDURE: Computed Tomography|PROCEDURE: Echocardiography|PROCEDURE: Multigated Acquisition Scan|DRUG: Neratinib Maleate|BIOLOGICAL: Trastuzumab Deruxtecan	Incidence of dose limiting toxicities, Safety endpoints will be listed for each dose level., In the first 2 cycles in dose escalation of combination of neratinib and trastuzumab deruxtecan (DS-8201a)|Incidence of treatment-emergent adverse events, Safety endpoints will be listed for each dose level and the tabulations of adverse events will also be produced by severity and by relationship to stud…	Incidence of adverse events, Graded according to the National Cancer Institute Common Terminology Criteria for Adverse Events version 5.0., Up to 1 year|Objective response rate, Defined as the percentage of patients who achieve complete response (CR) or partial response (PR) per Response Evaluation Criteria in Solid Tumors (RECIST) version (v) 1.1. Calculated with a 95% confidence interval., Up t…	Deoxyribonucleic acid (DNA) damage, Measured by gammaH2AX and pNBS1 immunofluorescence assay at cycle 1 days 3-5 and cycle 2 days 3-5 biopsies. Other pharmacodynamic biomarkers include cleaved PARP, Caspase 3, p-HER2, downstream signaling. Summarized using descriptive statistics (means, median, and standard deviations) at each measurement time point., Up to 1 year|Quantitative HER2 protein, Summa…	National Cancer Institute (NCI)		ALL	ADULT, OLDER_ADULT	PHASE1	30	NIH	INTERVENTIONAL	Allocation: NA|Intervention Model: SINGLE_GROUP|Masking: NONE|Primary Purpose: TREATMENT	NCI-2022-04099|NCI-2022-04099|202207020|10495|10495|UM1CA186689	2022-10-05	2025-06-01	2025-06-01	2022-05-13		2024-07-05	City of Hope Comprehensive Cancer Center, Duarte, California, 91010, United States|City of Hope at Irvine Lennar, Irvine, California, 92618, United States|City of Hope Antelope Valley, Lancaster, California, 93534, United States|UC Irvine Health/Chao Family Comprehensive Cancer Center, Orange, California, 92868, United States|University of California Davis Comprehensive Cancer Center, Sacramento,…
NCT06238479	LY4101174	Nectin-4	A Study of LY4101174 in Participants With Recurrent, Advanced or Metastatic Solid Tumors	https://clinicaltrials.gov/study/NCT06238479		RECRUITING	The purpose of this study is to find out whether the study drug, LY4101174, is safe, tolerable and effective in participants with advanced, or metastatic solid tumors. The study is conducted in two parts - phase Ia (dose-escalation, dose-optimization) and phase Ib (dose-expansion). The study will last up to approximately 4 years.	NO	Metastatic Solid Tumor|Recurrent Solid Tumor|Advanced Solid Tumor|Urinary Bladder Neoplasm|Triple Negative Breast Cancer|Non-small Cell Lung Cancer|Esophageal Cancer|Pancreatic Cancer|Ovarian Cancer|Cervical Cancer|Head and Neck Squamous Cell Carcinoma|Prostate Cancer|Renal Pelvis Cancer|Bladder Cancer	DRUG: LY4101174	Phase 1a: To determine the recommended dose of LY4101174, Number of participants with dose-limiting toxicities (DLTs), First 2 Cycles (28 days)|Phase 1a: To determine the recommended phase 2 dose (RP2D) or optimal dose of LY4101174, Number of participants with DLTs, First 2 Cycles (28 days)|Phase 1b: To assess the antitumor activity of LY4101174 Monotherapy: Overall response rate (ORR), ORR per i…	To characterize the pharmacokinetics (PK) properties of LY4101174: Minimum Plasma Concentration (Cmin), PK: Cmin of LY4101174, Cycle 1 (14 Days)|To characterize the PK properties of LY4101174: Area under the concentration versus time curve (AUC), PK: AUC of LY4101174, Cycle 1 (14 Days)|To evaluate the preliminary antitumor activity of LY4101174: Overall response rate (ORR), ORR per investigator a…		Eli Lilly and Company	Loxo Oncology, Inc.	ALL	ADULT, OLDER_ADULT	PHASE1	280	INDUSTRY	INTERVENTIONAL	Allocation: NON_RANDOMIZED|Intervention Model: PARALLEL|Masking: NONE|Primary Purpose: TREATMENT	LOXO-ENC-23001|J5A-OX-JZWA|2023-509867-26-00	2024-03-05	2026-08-26	2027-03-04	2024-02-02		2024-07-03	Massachusetts General Hospital, Boston, Massachusetts, 02114, United States|Washington University School of Medicine, Saint Louis, Missouri, 63110, United States|Laura & Isaac Perlmutter Cancer Center at NYU Langone Health, New York, New York, 10016, United States|Memorial Sloan Kettering Cancer Center, New York, New York, 10065, United States|UT Southwestern Medical Center, Dallas, Texas, 75390-…
NCT05115500	Disitamab vedotin	ERBB2	ADC Combined With Hypofractionated Radiotherapy, PD-1/PD-L1 Sequential GM-CSF and IL-2 for Treatment of HER-2 Positive Advanced Solid Tumors(PRaG3.0)	https://clinicaltrials.gov/study/NCT05115500		NOT_YET_RECRUITING	This is an open-label, single-arm, Phase II investigator-initiated trial of antibody-drug conjugate combined with hypofractionated radiotherapy, PD-1/PD-L1 inhibitor sequential GM-CSF and IL-2 for treatment of advanced refractory solid tumors with HER-2 positive	NO	Carcinoma|Solid Tumor	DRUG: ADC Combined With Radiotherapy, PD-1/PD-L1 Sequential GM-CSF and IL-2	Objective Response Rate （ORR）, Objective Response Rate was defined as the percentage of participants with a complete response (CR) or partial response (PR)., 24 months	Progression-free Survival (PFS), PFS was defined as the time from the first administration of study treatment to the first occurrence of disease progression as determined by investigator using RECIST v1.1 or death from any cause, whichever comes first., 24 months|Disease control rate (DCR), DCR was defined as the percentage of participants with a complete response (CR), partial response (PR), or …		Second Affiliated Hospital of Soochow University		ALL	ADULT, OLDER_ADULT	PHASE2	55	OTHER	INTERVENTIONAL	Allocation: NA|Intervention Model: SINGLE_GROUP|Masking: NONE|Primary Purpose: TREATMENT	JD-LK-2021-121-01	2021-11-01	2024-10-31	2025-04-30	2021-11-10		2021-11-10	The First Bethune Hospital of Jilin University, Changchun, China|The First People's Hospital of Changzhou, Changzhou, China|Harbin Medical University Cancer Hospital, Harbin, China|Jiangyin Peoples Hospital, Jiangyin, China|Qilu Hospital of Shangdong University, Jinan, China|Shandong Cancer Hospital, Jinan, China|The First People's Hospital of Kunshan, Kunshan, China|Jiangsu Cancer Hospital, Nanj…
NCT05405621	BAT8009	CD276	Assess Safety, Tolerability, Pharmacokinetics, and Preliminary Efficacy of BAT8009	https://clinicaltrials.gov/study/NCT05405621		RECRUITING	Primary objectives: * To evaluate the safety and tolerability of BAT8009 in patients with advanced solid tumours. * To determine the maximum tolerated dose (MTD) and recommended dose for Phase 2 (RP2D).	NO	Locally Advanced/Metastatic Solid Tumours	DRUG: BAT8009 for Injection	Dose-limiting toxicity(DLT), A DLT is defined as a toxicity occurring during the DLT observation period, A minimum of 21 days after first dose of BAT8009	Cmax (Maximum serum concentration), Maximum observed plasma or serum concentration, 126 days after first dosing|Immunogenicity, Presence of ADAs / neutralizing antibodies (NAbs)., 126 days after first dosing|AUC0-inf after Cycle 1 administration and AUC0- λ after Cycle 6 administration, area under the serum concentration versus time curve from time zero to infinity and to time λ, 126 days after f…		Bio-Thera Solutions		ALL	ADULT, OLDER_ADULT	PHASE1	48	INDUSTRY	INTERVENTIONAL	Allocation: NON_RANDOMIZED|Intervention Model: SEQUENTIAL|Masking: NONE|Primary Purpose: TREATMENT	BAT-8009-001-CR	2022-08-02	2024-12-23	2024-12-24	2022-06-06		2022-10-27	Sun Yat-sen University Cancer Center, Guangzhou, Guangdong, China
NCT02341625	BMS-986148	Mesothelin	A Study of BMS-986148 in Patients With Select Advanced Solid Tumors	https://clinicaltrials.gov/study/NCT02341625		TERMINATED	The purpose of this study is to determine the safety, tolerability, pharmacokinetics, immunogenicity, antitumor activity and pharmacodynamics of BMS-986148 administered alone and in combination with nivolumab in patients with mesothelioma, non-small cell lung cancer, ovarian cancer, pancreatic cancer and gastric cancer.	YES	Advanced Cancer	DRUG: BMS-986148|BIOLOGICAL: Nivolumab	Number of Participants With Adverse Events at Worst CTC Grade, Number of participants with adverse events at worst CTC grade including any grade adverse events (AEs), serious adverse events (SAEs), adverse events leading to discontinuations, and deaths grouped by dose + dose regimen., From first dose to up to 100 days post last dose (Up to 6 months)|Number of Participants With Laboratory Test Tox…	Maximum Observed Serum Concentration (Cmax), Maximum observed serum concentration (Cmax) of BMS-986148 grouped by dose + dose regimen. Note: The geometric CV was not calculated. Arithmetic % CV is reported instead., PK blood assessed on cycle 1, day 1|Time of Maximum Observed Serum Concentration (Tmax), Time of maximum observed serum concentration (Tmax) of BMS-986148 grouped by dose + dose regim…		Bristol-Myers Squibb		ALL	ADULT, OLDER_ADULT	PHASE1|PHASE2	126	INDUSTRY	INTERVENTIONAL	Allocation: NON_RANDOMIZED|Intervention Model: PARALLEL|Masking: NONE|Primary Purpose: TREATMENT	CA008-002|2014-002485-70	2015-06-19	2019-02-25	2020-05-07	2015-01-19	2022-08-18	2022-08-18	Moores Cancer Center, La Jolla, California, 92093-0698, United States|Duke University Medical Center, Durham, North Carolina, 27710, United States|Local Institution - 0013, Liverpool, New South Wales, 2170, Australia|Local Institution - 0014, Adelaide, South Australia, 5000, Australia|Local Institution - 0004, Clayton, Victoria, 3168, Australia|Local Institution - 0015, Nedlands, Western Australi…	Study Protocol, https://cdn.clinicaltrials.gov/large-docs/25/NCT02341625/Prot_000.pdf|Statistical Analysis Plan, https://cdn.clinicaltrials.gov/large-docs/25/NCT02341625/SAP_001.pdf
NCT04982224	REGN5093-M114	METxMET	Study of REGN5093-M114 (METxMET Antibody-Drug Conjugate) in Adult Patients With Mesenchymal Epithelial Transition Factor (MET) Overexpressing Advanced Cancer	https://clinicaltrials.gov/study/NCT04982224		RECRUITING	This study is researching an experimental drug called REGN5093-M114 by itself and in combination with cemiplimab. The study is focused on advanced non-small cell lung cancer (NSCLC) that produces too much of a protein called mesenchymal epithelial transition factor (MET) on the cancer cell surface. The aim of the study is to see how safe, tolerable, and effective the study drug is. This study wil…	NO	Advanced NSCLC	DRUG: REGN5093-M114|DRUG: Cemiplimab	Dose limiting toxicities (DLTs), Dose escalation (Phase 1), Up to 28 days|Treatment-emergent adverse events (TEAEs), Dose escalation (Phase 1), Through study completion, an average of 2 years|Serious adverse events (SAEs), Dose escalation (Phase 1), Through study completion, an average of 2 years|TEAEs leading to study treatment discontinuation, Dose escalation (Phase 1), Through study completion…	ORR, Dose escalation (Phase 1), Through study completion, an average of 2 years|TEAEs, Dose expansion (Phase 2), Through study completion, an average of 2 years|SAEs, Dose expansion (Phase 2), Through study completion, an average of 2 years|TEAEs leading to study treatment discontinuation, Dose expansion (Phase 2), Through study completion, an average of 2 years|TEAEs leading to death, Dose expan…		Regeneron Pharmaceuticals		ALL	ADULT, OLDER_ADULT	PHASE1|PHASE2	237	INDUSTRY	INTERVENTIONAL	Allocation: NON_RANDOMIZED|Intervention Model: SEQUENTIAL|Masking: NONE|Primary Purpose: TREATMENT	R5093-M114-ONC-1864|2020-005065-14	2021-11-09	2030-02-01	2030-02-01	2021-07-29		2024-07-11	University of California Irvine Medical Center (UCIMC), Irvine, California, 92617, United States|University of Colorado Hospital - Anschutz Cancer Pavilion (ACP), Aurora, Colorado, 80045, United States|John Hopkins, Baltimore, Maryland, 21231, United States|Johns Hopkins Satellite Site, Baltimore, Maryland, 21231, United States|Dana Farber Cancer Institute, Boston, Massachusetts, 02215, United St…
NCT05320588	BIO-106	TROP2	A Study in Patients With Advanced Cancers	https://clinicaltrials.gov/study/NCT05320588		RECRUITING	A first-in-human study using BIO-106 as a single agent and in combination with pembrolizumab in advanced cancers.	NO	Advanced Cancer|Advanced Solid Tumor|Cancer|Oncology	DRUG: BIO-106|DRUG: Pembrolizumab	Incidence of adverse events (AEs) and serious adverse events (SAEs) - (Phase 1), Escalation period, 1 year|Incidence and nature of dose-limiting toxicities (DLTs) - (Phase 1), Escalation period, up to 21 days|Maximum tolerable dose (MTD) or a tolerated dose below MTD - (Phase 1), Escalation period, 1 year|Anti-tumor activity by objective response rate (ORR), disease control rate (DCR), duration o…	Anti-tumor activity by objective response rate (ORR), disease control rate (DCR), duration of response (DOR), progression-free survival (PFS), and overall survival (OS) - (Phase 1), Escalation Period, 1 year|Incidence of adverse event of special interest (AESI) - (Phase 2), Expansion period, 2 years|Incidence of adverse events (AEs) and serious adverse events (SAEs) - (Phase 2), Expansion period,…		BiOneCure Therapeutics Inc.		ALL	ADULT, OLDER_ADULT	PHASE1|PHASE2	332	INDUSTRY	INTERVENTIONAL	Allocation: NON_RANDOMIZED|Intervention Model: SEQUENTIAL|Masking: NONE|Primary Purpose: TREATMENT	StarBridge-1	2022-03-25	2024-04-24	2024-04-27	2022-04-11		2022-07-19	NEXT Oncology Austin, Austin, Texas, 78758, United States|University of Texas MD Anderson Cancer Center, Houston, Texas, 77030, United States|NEXT Oncology Virginia, Fairfax, Virginia, 22031, United States
NCT04039230	Sacituzumab Govitecan	TROP2	Study to Evaluate Sacituzumab Govitecan in Combination With Talazoparib in Patients With Metastatic Breast Cancer.	https://clinicaltrials.gov/study/NCT04039230		RECRUITING	This research is studying the effect of Antibody-Drug Conjugate Sacituzumab Govitecan in Combination with the Poly (Adenosine Diphosphate \[ADP\]-Ribose) Polymerase (PARP) Inhibitor Talazoparib in Patients with Metastatic Triple-Negative Breast Cancer.	NO	Breast Cancer	DRUG: Talazoparib|DRUG: Sacituzumab Govitecan	Dose Limiting Toxicity, 2 years	Time-to-Tumor Response, 2 years|Duration of response, 2 years|Progression-Free Survival, 2 Years|Overall Survival Rate, 2 years		Massachusetts General Hospital	Pfizer	FEMALE	ADULT, OLDER_ADULT	PHASE1|PHASE2	75	OTHER	INTERVENTIONAL	Allocation: NA|Intervention Model: SINGLE_GROUP|Masking: NONE|Primary Purpose: TREATMENT	19-239	2019-10-09	2024-12-25	2024-12-26	2019-07-31		2024-04-01	Massachusetts General Hospital Cancer Center, Boston, Massachusetts, 02115, United States|Boston Medical Center, Boston, Massachusetts, 02118, United States
NCT05547321	OMTX705	FAP	Efficacy and Safety Study of OMTX705, Monotherapy and Pembrolizumab-combined, in Subjects With Advanced Solid Tumors.	https://clinicaltrials.gov/study/NCT05547321		RECRUITING	Open-label, two parallel arm, multicenter, Phase 1 dose-escalation study to evaluate the safety and tolerability of OMTX705, both as monotherapy or in combination with pembrolizumab in the treatment of patients with advanced or metastatic cancer in whom there is no available standard therapeutic option.	NO	Advanced Solid Tumor	DRUG: OMTX705|DRUG: Pembrolizumab	Safety evaluation of OMTX705, Frequency by grade of treatment-emergent adverse events (TEAEs)., Through study completion, an average of 24 months	Evaluation of the preliminary signs of antitumor activity of OMTX705 as monotherapy and in combination with pembrolizumab, By assessing the objective response rate (ORR) \[complete response (CR) + partial response (PR)\] per the Response Evaluation Criteria in Solid Tumors scale version 1.1 (RECIST 1.1), Through study completion, an average of 24 months|Evaluation of the OMTX705 Pharmacokinetics,…	Evaluation of standard cancer serum biomarkers, By measuring the change in circulating cancer blood biomarkers prior and after using OMTX705 as monotherapy and in combination with pembrolizumab, Through study completion, an average of 24 months|Evaluation of OMTX705 biomarkers, By measuring the changes in circulating OMTX705 biomarkers prior and after using OMTX705 as monotherapy and in combinati…	Oncomatryx Biopharma S.L.		ALL	ADULT, OLDER_ADULT	PHASE1	120	INDUSTRY	INTERVENTIONAL	Allocation: NON_RANDOMIZED|Intervention Model: PARALLEL|Masking: NONE|Primary Purpose: OTHER	OMTX705-001	2022-10-20	2024-10-24	2024-10-24	2022-09-21		2024-02-05	Beth Israel Deaconess Medical Center, Boston, Massachusetts, 02215, United States|ICO L'Hospitalet, L'Hospitalet de Llobregat, Barcelona, Spain|Hospital Universitario de Donostia, San Sebastián, Guipúzcoa, Spain|Clínica Universitaria de Navarra, Pamplona, Navarra, Spain|Hospital Universitari Vall d'Hebron, Barcelona, Spain|Hospital 12 Octubre, Madrid, Spain|Hospital MD Anderson, Madrid, Spain|Onk…
NCT06235216	Sacituzumab Govitecan	TROP2	Sacituzumab govitEcan in THYroid Cancers	https://clinicaltrials.gov/study/NCT06235216	SETHY	NOT_YET_RECRUITING	SETHY is a prospective, multicohort, phase II, single-arm, non-randomized, non-blinded, investigator-initiated study of sacituzumab govitecan in patients with advanced or metastatic radioactive-iodine refractory differentiated thyroid carcinoma (DTC) or anaplastic thyroid carcinoma (ATC). The main hypothesis is that treatment with sacituzumab govitecan, a anti-Trophoblast cell surface antigen 2 (…	NO	Differentiated Thyroid Cancer|Anaplastic Thyroid Cancer	DRUG: Sacituzumab govitecan	Objective response rate (ORR), percentage/proportion of patients with confirmed complete response (CR) or partial response (PR) as their overall best response throughout the study period. Objective responses will be assessed locally by the investigator according to RECIST, version 1.1, Throughout the study period, approximately 42 months since the inclusion of first patient	Disease control rate (DCR), Percentage/proportion of patients with complete response (CR) or partial response (PR), according to ORR definition for the trial, or maintained stable disease (SD) as their overall best response, assessed by imaging follow-up (CT scan/MRI) and RECIST 1.1 criteria. Stable disease should be maintained for at least 4 months to be considered as a CBR event., Throughout th…	TROP-2 positive rate, Determined centrally on most recent archival tumor samples collected at baseline. Percentage/proportion of patients considered positive for the expression of TROP-2 gene. Strong complete membranous staining in \>5% of cells was considered positive., Baseline	Grupo Espanol de Tumores Neuroendocrinos	MFAR|Gilead Sciences	ALL	ADULT, OLDER_ADULT	PHASE2	42	OTHER	INTERVENTIONAL	Allocation: NA|Intervention Model: SINGLE_GROUP|Masking: NONE|Primary Purpose: TREATMENT	GETNE T2318|2023-504898-20	2024-02-24	2024-04-27	2024-07-27	2024-01-31		2024-01-31	Hospital Universitari Vall d'Hebron, Barcelona, Spain|Complexo Hospitalario Universitario de Ferrol, Ferrol, Spain|Institut Catala d′Oncologia (ICO) -Hospitalet, Hospitalet de Llobregat (Barcelona), Spain|Hospital Clínico San Carlos, Madrid, Spain|Hospital Universitario la Paz, Madrid, Spain|Hospital Universitario Ramón y Cajal, Madrid, Spain|MD Anderson Cancer Center Madrid, Madrid, Spain|Hospit…
NCT04300556	Farletuzumab ecteribulin	FOLR1	A Study to Evaluate the Safety, Tolerability, and Efficacy of MORAb-202 (Herein Referred to as Farletuzumab Ecteribulin), a Folate Receptor Alpha (FRα)-Targeting Antibody-drug Conjugate (ADC) in Participants With Selected Tumor Types	https://clinicaltrials.gov/study/NCT04300556		RECRUITING	The primary objectives of the study are: (1) in the dose-escalation part: to evaluate safety and tolerability and to determine the recommended Phase 2 dose (RP2D) of farletuzumab ecteribulin (MORAb-202) in participants with selected tumor types (ovarian cancer \[OC\], endometrial cancer \[EC\], non-small cell lung carcinoma \[NSCLC\], triple-negative breast cancer \[TNBC\]), and (2) in dose-confi…	NO	Solid Tumor	DRUG: Farletuzumab ecteribulin|DRUG: Prednisone|DRUG: Prednisolone|DRUG: Dexamethasone	Dose Escalation Part: Recommended Phase 2 Dose (RP2D) of Farletuzumab Ecteribulin, Cycle 1 (Cycle length is equal to [=] 21 days)|Objective Response Rate (ORR), ORR is defined as the percentage of participants with a best overall response (BOR) of complete response (CR) or partial response (PR), based on the investigator assessment of radiologic response according to Response Evaluation Criteria …	Duration of Response (DOR), DOR is defined as the time from the first date of documented CR or PR to the date of disease progression or death, whichever occurs first. It will be calculated for participants whose BOR is CR or PR. DOR will be assessed according to RECIST version 1.1., From first documented CR or PR until first documentation of recurrent or progressive disease or death (up to approx…		Eisai Inc.	Bristol-Myers Squibb	ALL	ADULT, OLDER_ADULT	PHASE1|PHASE2	142	INDUSTRY	INTERVENTIONAL	Allocation: RANDOMIZED|Intervention Model: SEQUENTIAL|Masking: NONE|Primary Purpose: TREATMENT	MORAb-202-G000-201|2019-003600-12	2020-08-06	2025-03-31	2025-03-31	2020-03-09		2023-11-01	Arizona Clinical Research Center - Hunt - PPDS, Tucson, Arizona, 85715, United States|University of Arkansas For Medical Sciences, Little Rock, Arkansas, 72205, United States|Stanford University School of Medicine, Stanford, California, 94305, United States|H Lee Moffitt Cancer Center and Research Institute, Tampa, Florida, 33612, United States|Winship Cancer Institute, Emory University, Atlanta,…
NCT06014190	HS-20089	B7-H4	HS-20089 in Patients With Ovarian Cancer and Endometrial Cancer	https://clinicaltrials.gov/study/NCT06014190		RECRUITING	HS-20089 is an investigational antibody-drug conjugate (ADC) composed of a humanized IgG1 anti-B7-H4 monoclonal antibody conjugated to the topoisomerase I inhibitor payload via a protease-cleavable linker, with an average drug-to-antibody ratio of about 6. This is a phase 2, open-label, multi-center study to evaluate the efficacy, safety, pharmacokinetics (PK) and immunogenicity of HS-20089 as mo…	NO	Ovarian Cancer|Fallopian Tube Cancer|Primary Peritoneal Cancer|Endometrial Cancer	DRUG: HS-20089	Objective response rate (ORR) assessed by investigators according to Response Evaluation Criteria in Solid Tumors (RECIST) 1.1, ORR is defined as the percentage of participants who achieved a best overall response (BOR) of confirmed complete response (CR) or partial response (PR), assessed by investigators based on RECIST 1.1., From the first dose up to disease progression or withdrawal from stud…	ORR assessed by independent review committee (IRC) according to RECIST 1.1, ORR is defined as the percentage of participants who achieved a BOR of confirmed CR or PR, assessed by IRC based on RECIST 1.1., From the first dose to disease progression or withdrawal from study, whichever came first, assessed up to 24 months.|Duration of response (DoR) assessed by investigators and IRC according to REC…		Hansoh BioMedical R&D Company		ALL	ADULT, OLDER_ADULT	PHASE2	460	INDUSTRY	INTERVENTIONAL	Allocation: RANDOMIZED|Intervention Model: PARALLEL|Masking: NONE|Primary Purpose: TREATMENT	HS-20089-201	2023-12-18	2025-12-31	2027-12-31	2023-08-28		2024-04-03	Lingying Wu, Beijing, Beijing, 100020, China
NCT02452554	Lorvotuzumab Mertansine	CD56	Lorvotuzumab Mertansine in Treating Younger Patients With Relapsed or Refractory Wilms Tumor, Rhabdomyosarcoma, Neuroblastoma, Pleuropulmonary Blastoma, Malignant Peripheral Nerve Sheath Tumor, or Synovial Sarcoma	https://clinicaltrials.gov/study/NCT02452554		COMPLETED	This phase II trial studies how well lorvotuzumab mertansine works in treating younger patients with Wilms tumor, rhabdomyosarcoma, neuroblastoma, pleuropulmonary blastoma, malignant peripheral nerve sheath tumor (MPNST), or synovial sarcoma that has returned or that does not respond to treatment. Antibody-drug conjugates, such as lorvotuzumab mertansine, are created by attaching an antibody (pro…	YES	Pleuropulmonary Blastoma|Recurrent Malignant Peripheral Nerve Sheath Tumor|Recurrent Neuroblastoma|Recurrent Rhabdomyosarcoma|Recurrent Synovial Sarcoma|Wilms Tumor	OTHER: Laboratory Biomarker Analysis|BIOLOGICAL: Lorvotuzumab Mertansine|OTHER: Pharmacological Study	Objective Response by Response Evaluation Criteria in Solid Tumors Version 1.1, The best response of disease will be examined separately in each stratum. A responder is defined as a patient who achieves a best response of partial response or complete response on the study. Response rates will be calculated as the percent of evaluable patients who are responders, and Clopper-Pearson confidence int…		Pharmacokinetic (PK) Parameters of Lorvotuzumab Mertansine, A descriptive analysis of PK parameters of lorvotuzumab mertansine will be performed to define systemic exposure, drug clearance, and other pharmacokinetic parameters. The PK parameters will be summarized with simple summary statistics, including means, medians, ranges, and standard deviations (if numbers and distribution permit). Analys…	Children's Oncology Group	National Cancer Institute (NCI)	ALL	CHILD, ADULT	PHASE2	62	NETWORK	INTERVENTIONAL	Allocation: NA|Intervention Model: SINGLE_GROUP|Masking: NONE|Primary Purpose: TREATMENT	ADVL1522|NCI-2015-00746|ADVL1522|ADVL1522|ADVL1522|U10CA180886	2015-10-12	2017-06-30	2021-09-30	2015-05-22	2019-08-29	2022-01-13	Children's Hospital of Alabama, Birmingham, Alabama, 35233, United States|Arkansas Children's Hospital, Little Rock, Arkansas, 72202-3591, United States|Kaiser Permanente Downey Medical Center, Downey, California, 90242, United States|Loma Linda University Medical Center, Loma Linda, California, 92354, United States|Children's Hospital Los Angeles, Los Angeles, California, 90027, United States|Ch…	Study Protocol and Statistical Analysis Plan, https://cdn.clinicaltrials.gov/large-docs/54/NCT02452554/Prot_SAP_000.pdf
NCT05866354	Tisotumab Vedotin	TF	To Evaluate Pharmacokinetics of Tisotumab Vedotin in Chinese Subjects With Metastatic or Recurrent Solid Malignancies	https://clinicaltrials.gov/study/NCT05866354		COMPLETED	The goal of this clinical trial is to test in Chinese Subjects with Metastatic or Recurrent Solid Malignancies. The main questions it aims to answer are: * How is the PK of tisotumab vedotin? * How is the immunogenicity of tisotumab vedotin? * How is the safety and tolerability of tisotumab vedotin? * How is the clinical efficacy of tisotumab vedotin? Participants will receive 2.0 mg/kg tisotumab…	NO	Solid Malignancies	DRUG: Tisotumab Vedotin	PK parameter AUC of tisotumab vedotin, To assess PK of tisotumab vedotin.PK parameters to be estimated will include area under the concentration-time curve (AUC)., At the end of Cycle 3 (each cycle is 21 days) of the last ongoing patient, about 1 year.|PK parameter Cmax of tisotumab vedotin, To assess PK of tisotumab vedotin.PK parameters to be estimated will include maximum concentration (Cmax).…	Immunogenicity of tisotumab vedotin., Anti-drug antibodies (ADAs) against tisotumab vedotin., At the end of Cycle 3 (each cycle is 21 days) of the last ongoing patient, about 1 year.|Treatment-emergent adverse events (TEAEs) of tisotumab vedotin., A TEAE is defined as a newly occurring or worsening AE from the first dose of study treatment to 30 days after the last dose of study treatment or init…	Objective response rate (ORR) of tisotumab vedotin., Confirmed objective response rate (ORR) assessed by the investigator per the Response Evaluation Criteria in Solid Tumors (RECIST) v1.1., Through study completion, an average of 1 year.	Zai Lab (Shanghai) Co., Ltd.		ALL	ADULT, OLDER_ADULT	PHASE1	19	INDUSTRY	INTERVENTIONAL	Allocation: NON_RANDOMIZED|Intervention Model: SINGLE_GROUP|Masking: NONE|Primary Purpose: TREATMENT	ZL-1309-002	2023-06-16	2023-11-02	2023-11-02	2023-05-19		2023-11-27	Jinan Central Hospital, Jinan, Shangdong, 250013, China
NCT06234423	CUSP06	CDH6	A Study of CUSP06 in Patients With Platinum-Refractory/Resistant Ovarian Cancer and Other Advanced Solid Tumors	https://clinicaltrials.gov/study/NCT06234423		RECRUITING	This phase 1 study will evaluate the safety, tolerability, pharmacokinetics, and efficacy of CUSP06 in patients with platinum-refractory/resistant ovarian cancer and other advanced solid tumors.	NO	Ovarian Cancer|Solid Tumor	DRUG: CUSP06	Characterize the safety and tolerability of CUSP06 (Phase 1a and 1b), Type, incidence, and severity of adverse events (AEs) and serious adverse events (SAEs) using the NCI CTCAE v.5.0. Frequency and duration of dose interruptions and reductions., 36 months|Determine the recommended dose for expansion (RDE) of CUSP06 (Phase 1a), 15 months|Evaluate preliminary efficacy of CUSP06 as per Response Eva…	Evaluate the pharmacokinetic (PK) profile of CUSP06 - maximum concentration (Cmax) (Phase 1a and 1b), 36 months|Evaluate the pharmacokinetic (PK) profile of CUSP06 - time to Cmax (Tmax) (Phase 1a and 1b), 36 months|Evaluate the pharmacokinetic (PK) profile of CUSP06 - area under the curve (AUC) (Phase 1a and 1b), 36 months|Evaluate the pharmacokinetic (PK) profile of CUSP06 - terminal half-life (…		OnCusp Therapeutics, Inc.		ALL	ADULT, OLDER_ADULT	PHASE1	180	INDUSTRY	INTERVENTIONAL	Allocation: NON_RANDOMIZED|Intervention Model: SEQUENTIAL|Masking: NONE|Primary Purpose: TREATMENT	CUSP06-1001	2024-02-09	2027-05-30	2027-08-31	2024-01-31		2024-05-02	Sarah Cannon Research Institute at HealthONE, Denver, Colorado, 80218, United States|Florida Cancer Specialists, Sarasota, Florida, 34232, United States|SCRI Oncology Partners, Nashville, Tennessee, 37203, United States|MD Anderson Cancer Center, Houston, Texas, 77030, United States|NEXT Oncology, Fairfax, Virginia, 22031, United States
NCT06224673	ARX788	ERBB2	ARX788 for Treating Patients With HER2-low Locally Advanced Unresectable or Metastatic Breast Cancer	https://clinicaltrials.gov/study/NCT06224673		NOT_YET_RECRUITING	This phase II trial tests how well ARX788 works in treating patients diagnosed with HER2-low, locally advanced unresectable or metastatic breast cancer. ARX788 is an antibody-drug conjugate (ADC) that is given by infusion (diluted and injected slowly into veins). Antibodies are proteins which are naturally produced by the body's immune system to help fight infections. ARX788 consists of antibodie…	NO	HER2 Low Breast Carcinoma|Triple Negative Breast Cancer|Hormone-receptor-positive Breast Cancer|Hormone Receptor Positive Breast Carcinoma	DRUG: ARX788|PROCEDURE: Computed Tomography (CT)|PROCEDURE: Biospecimen Collection	Objective response rate (ORR), Objective response rate (ORR) is defined as the proportion of participants who experience complete response (CR) or partial response (PR) using Response Evaluation Criteria in Solid Tumors (RECIST) 1.1. The ORR and corresponding two-sided exact 90% confidence intervals will be reported., Up to 1 year	Duration of response (DOR), Duration of response (DOR) is defined as the time between the date of first response and the date of disease progression or death, whichever occurs first, will be computed for participants with a BOR of CR or PR. Medians and corresponding two-sided 95% confidence intervals will be reported., Up to 1 year|Overall Best Response (BOR), Best overall response (BOR) is defin…		Laura Huppert, MD, BA	Ambrx, Inc.	ALL	ADULT, OLDER_ADULT	PHASE2	36	OTHER	INTERVENTIONAL	Allocation: NON_RANDOMIZED|Intervention Model: PARALLEL|Masking: NONE|Primary Purpose: TREATMENT	237527|NCI-2024-00073	2024-07-15	2027-11-30	2028-11-30	2024-01-25		2024-06-21	University of California, San Francisco, San Francisco, California, 94143, United States
NCT05565807	STI-6129	CD38	Safety and Efficacy Study of An Anti-CD38 Antibody Drug Conjugate in Relapsed or Refractory Multiple Myeloma	https://clinicaltrials.gov/study/NCT05565807		RECRUITING	This is a phase Ib/IIa, open-label, dose-escalation, and extension study to evaluate the safety and efficacy of an anti-CD38 antibody drug conjugate (STI-6129) in patients with relapsed or refractory multiple myeloma.	NO	Relapsed or Refractory Multiple Myeloma	BIOLOGICAL: STI-6129	Incidence of adverse events（AEs）, Assessing the incidence of adverse events (AEs) using the Common Terminology Criteria for Adverse Events (CTCAE Version 5)., Up to 2 years|Overall response rate（ORR）, ORR assessed by the modified IMWG response criteria., Up to 2 years	Plasma concentration of the total anti-CD38 antibody, Determine plasma levels of the total antibody., Up to 2 years|Plasma concentration of conjugated toxin, Determine plasma levels of conjugated toxin (STI 6129)., Up to 2 years|Plasma concentration of the free toxin, Determine plasma levels of the free toxin (duostatin 5.2)., Up to 2 years|Recommended Phase 2 dose (RP2D), Determined according to…		Zhejiang ACEA Pharmaceutical Co. Ltd.		ALL	ADULT, OLDER_ADULT	PHASE1|PHASE2	84	INDUSTRY	INTERVENTIONAL	Allocation: NA|Intervention Model: SEQUENTIAL|Masking: NONE|Primary Purpose: TREATMENT	38ADC-RRMM-C101	2023-02-09	2025-03-07	2027-02-19	2022-10-04		2023-08-14	Beijing Chao-Yang Hospital，Capital Medicine University, Beijing, Beijing, 100000, China|Peking university Third hospital, Beijing, Beijing, 100191, China|The first affiliated hospital ,Sun Yat-sen University, Guangzhou, Guangdong, 510080, China|The First Affiliated Hospital Zhejiang University School of Medicine, Hangzhou, Zhejiang, China
NCT05200364	Luveltamab Tazevibulin	FOLR1	A Study of STRO-002, an Anti-Folate Receptor Alpha Antibody Drug Conjugate, in Combination With Bevacizumab in Epithelial Ovarian Cancer	https://clinicaltrials.gov/study/NCT05200364		ACTIVE_NOT_RECRUITING	Phase 1 trial to study the safety, pharmacokinetic and Preliminary Efficacy of STRO-002 in combination with Bevacizumab.	NO	Ovarian Cancer|Ovarian Carcinoma|Ovary Cancer|Fallopian Tube Cancer|Primary Peritoneal Carcinoma	DRUG: STRO-002|DRUG: Bevacizumab	Part 1 - Safety and tolerability of STRO-002/bevacizumab as a combination therapy, Incidence and severity of adverse events (AEs) and clinical laboratory abnormalities observed across STRO-002/bevacizumab dose levels. Incidence of dose-limiting toxicities (DLTs) through Day 1-21 following administration of each initial STRO-002/bevacizumab dose., From baseline through end of study (approximately …	Part 1 - Characterize the pharmacokinetics (PK) of STRO-002 by measuring the maximum plasma concentration (Cmax)., Measurement of maximum plasma concentration (Cmax) after the administration of STRO-002, From baseline through end of study (approximately 24 months)|Part 1 - Characterize the PK of STRO-002 by measuring the area under the plasma concentration versus time curve (AUC), Measurement of …		Sutro Biopharma, Inc.		FEMALE	ADULT, OLDER_ADULT	PHASE1	58	INDUSTRY	INTERVENTIONAL	Allocation: NA|Intervention Model: SEQUENTIAL|Masking: NONE|Primary Purpose: TREATMENT	STRO-002-GM2	2022-03-22	2024-12-25	2024-01-26	2022-01-20		2024-06-11	University of South Florida,, Tampa, Florida, 33612, United States|Thomas Jefferson University, Philadelphia, Pennsylvania, 19017, United States|University of Pennsylvania, Philadelphia, Pennsylvania, 19104, United States|Tennessee Oncology, Nashville, Tennessee, 37203, United States|Virginia Cancer Specialists, Fairfax, Virginia, 22031, United States|Medical College of Wisconsin, Milwaukee, Wisc…
NCT05493683	Disitamab vedotin	ERBB2	Disitamab Vedotin Combined With Tislelizumab in Advanced HER2 Positive Colorectal Cancer	https://clinicaltrials.gov/study/NCT05493683		RECRUITING	Among patients with colonrectal cancer, 5% were HER-2 positive, but the immunohistochemical results were mostly HER-2 2 +, which did not meet the indications of HER-2 targeting drugs. Disitamab Vedotin , which was listed in China last year, achieved similar results in HER-2 2+ and 3+, according to a clinical trial for breast cancer, suggesting that patients with colonrectal cancer may benefit fro…	NO	Colorectal Neoplasms	DRUG: Disitamab vedotin|DRUG: Tislelizumab	Objective response rate(ORR), The percentage of subjects with total number of Complete Response (CR) + total number of Partial Response (PR), up to 2 years	Progression-free Survival(PFS), PFS was defined as the time from assignment to disease progression radiological/clinical or death due to any cause, whichever occurs first. Subjects without progression or death at the time of analysis were censored at their last date of tumor evaluation., From date of subjects until the date of first documented progression or death from any cause, whichever came f…		The First Affiliated Hospital with Nanjing Medical University		ALL	ADULT, OLDER_ADULT	PHASE2	29	OTHER	INTERVENTIONAL	Allocation: NA|Intervention Model: SINGLE_GROUP|Masking: NONE|Primary Purpose: TREATMENT	KEEP-G 07	2022-08-01	2024-07-25	2024-07-25	2022-08-09		2022-10-21	Changzhou NO.2 People's Hospital, Changzhou, Jiangsu, 150000, China|The Affiliated Huaian No.1 People's Hospital of Nanjing Medical University, Huai'an, Jiangsu, 150000, China|The First Affiliated Hospital with Nanjing Medical University, Nanjing, Jiangsu, 210029, China|the Third Affiliated Hospital of Soochow University, Suzhou, Jiangsu, 150000, China|Xuzhou Central Hospital, Xuzhou, Jiangsu, 15…
NCT05544968	CD30 biAb-AATC	CD30;CD3	CD30biAb-AATC for CD30+ Malignancies	https://clinicaltrials.gov/study/NCT05544968		NOT_YET_RECRUITING	This first-in-human trial will assess the safety, feasibility, and efficacy of an immunotherapy with a novel CD30 antibody conjugated to a CD3 antibody that is preloaded onto a patient's own T-cells, generating a CD30 bispecific antibody-armed, anti-CD3-activated, autologous T-cells (CD30 biAb-AATC).	NO	Hodgkin Disease|CD30-Positive Diffuse Large B-Cell Lymphoma|CD30+ Anaplastic Large Cell Lymphoma|CD30+ Pleomorphic Large T-Cell Cutaneous Lymphoma|CD30+ Immunoblastic Large T-Cell Cutaneous Lymphoma|Leukemia|Lymphoma	DRUG: anti-CD30 Bispecific Antibody-armed anti-CD3-Activated Autologous T-cells (CD30 biAb-AATC)	Maximum Tolerated Dose, To determine the MTD and recommended Phase II dose of CD30 biAb-AATC administered once weekly for a total of 4 doses per cycle, 3 years|Define Toxicities - CTCAE v5.0, To define the toxicities of CD30 biAb-AATC with twice weekly subcutaneous GM-CSF, 3 years	Pharmacokinetics of CD30 biAb-AATC - Cmax, To define the circulating pharmacokinetics of CD30 biAb-AATC with twice weekly subcutaneous GM-CSF. Determination of peak plasma concentration, 3 years|Pharmacokinetics of CD30 biAb-AATC - AUC(0-28day), To define the circulating pharmacokinetics of CD30 biAb-AATC with twice weekly subcutaneous GM-CSF. Determination of persistence through AUC (0-28 day), …		Medical College of Wisconsin		ALL	ADULT, OLDER_ADULT	PHASE1|PHASE2	42	OTHER	INTERVENTIONAL	Allocation: NA|Intervention Model: SINGLE_GROUP|Masking: NONE|Primary Purpose: TREATMENT	IIT-SCHLOEMER-BAAT	2024-12-24	2024-01-27	2024-01-27	2022-09-19		2024-03-22	Children's Wisconsin, Milwaukee, Wisconsin, 53226, United States
NCT01101594	Milatuzumab-doxorubicin	CD74	A Study of hLL1-DOX (Milatuzumab-Doxorubicin Antibody-Drug Conjugate) in Patients With Multiple Myeloma	https://clinicaltrials.gov/study/NCT01101594		TERMINATED	This study is a Ph I trial to test the safety of the study drug, hLL1-DOX at different dose levels in patients with recurrent multiple myeloma. HLL1 is also known as milatuzumab and is attached to doxorubicin in this clinical trial.	NO	Multiple Myeloma	DRUG: hLL1-DOX (the doxorubicin conjugate of milatuzumab)	All patients administered any dose of study drug will be included in the evaluation of safety, The frequency and severity of adverse events (AEs) will be tabulated by MedDRA Preferred Term and System Organ Class (SOC) for each dose group. AEs will be classified using the MedDRA version 8.0 with severity assessed by NCI CTC v3 toxicity grades, Before infusion, 5 min after start, every 15 min until…	Determine the therapeutic efficacy of hLL1-DOX in this patient population, All patients who were treated with at least one complete dose of study drug and have available response assessment data will constitute the efficacy population. For efficacy evaluations, treatment responses based on IMWG Response Criteria, response duration and progression-free survival will be tabulated and summarized by …		Gilead Sciences		ALL	ADULT, OLDER_ADULT	PHASE1|PHASE2	17	INDUSTRY	INTERVENTIONAL	Allocation: NA|Intervention Model: SINGLE_GROUP|Masking: NONE|Primary Purpose: TREATMENT	IM-T-hLL1-DOX-01	2024-07-10	2024-07-13	2024-07-13	2010-04-12		2021-08-16	MD Anderson Orlando, Orlando, Florida, 32806, United States|Georgia Cancer Specialists, Atlanta, Georgia, 30068, United States|Hackensack University Medical Center, Hackensack, New Jersey, 07601, United States|University Hospital of Pennsylvania, Philadelphia, Pennsylvania, 19104, United States|MD Anderson Center, Houston, Texas, 77030, United States
NCT04983121	ARX788	ERBB2	Efficacy and Safety of Pyrotinib Maleate Combined With ARX788 Neoadjuvant Treatment in Breast Cancer Patients	https://clinicaltrials.gov/study/NCT04983121		RECRUITING	Next-generation Site-specific human epidermal growth factor receptor 2 (HER2)-targeting Antibody-drug Conjugate (ARX788) is an antibody-conjugated drug. Results from the phase I safety, tolerability and pharmacokinetic trial of ARX788 single drug in Chinese patients with advanced HER2 breast cancer indicated a good safety of the test drug, and responses to anti-tumor therapy were observed in the …	NO	Breast Neoplasms	DRUG: Next-generation Site-specific human epidermal growth factor receptor 2 (HER2)-targeting Antibody-drug Conjugate (ARX788)	Residual tumor burden (RCB) classification in grades, Postoperative pathological results will be used to assess the residual tumor area of primary breast tumor (area in mm×mm), the cell density of the residual tumor（cell density in percentages）, the proportion of carcinoma in situ (proportion of carcinoma in percentages), the number of positive lymph nodes and the diameter of largest metastasis w…	Best overall response rate (BORR) in percentage, The proportion of patients who achieve remission at any point during the study., At least 3 years since enrollment|Total pathological complete response rate (tpCR) in percentage, The standard for removal of breast and lymph node tumors which means there are no infiltrating cancer cells at the primary breast and axillary lymph nodes, and only intrad…	Adverse events (AE), Adverse events (AE) will be assessed as per the NCI-CTC AE 5.0 standard., at least 3 years since enrollment	Shengjing Hospital		FEMALE	ADULT, OLDER_ADULT	PHASE2	30	OTHER	INTERVENTIONAL	Allocation: NA|Intervention Model: SINGLE_GROUP|Masking: NONE|Primary Purpose: TREATMENT	Shengjing-LCG009	2021-08-01	2027-08-15	2027-08-15	2021-07-30		2022-09-13	Shengjing Hospital affiliated to China Medical University, Shenyang, Liaoning, 110004, China
NCT00072410	hu3S193	Lewis-y	Radiolabeled Monoclonal Antibody in Treating Patients With Advanced Ovarian Epithelial Cancer	https://clinicaltrials.gov/study/NCT00072410		COMPLETED	RATIONALE: Radiolabeled monoclonal antibodies can locate tumor cells and deliver radioactive tumor-killing substances to them without harming normal cells. Giving radiolabeled monoclonal antibody directly into the abdominal cavity may kill more tumor cells. PURPOSE: Phase I trial to study the effectiveness of giving radiolabeled monoclonal antibody therapy directly into the abdominal cavity in tr…	YES	Ovarian Cancer	BIOLOGICAL: 90Y-hu3S193|BIOLOGICAL: 111In-hu3S193	Number of Patients With Dose-limiting Toxicities (DLTs), All adverse events were graded according to the National Cancer Institute Common Toxicity Criteria (CTC) Scale (Version 2.0, published April 30, 1999). DLT was defined as: * Any Grade 3 or greater non-hematological toxicity (except for alopecia, nausea, and vomiting, defined separately below) * Any Grade alopecia * Grade 4 nausea or vomitin…	Clearance as Measured by the Half-life (T1/2) of the Elimination Phase, Serum samples were taken 5 min, 1 hour, and 2 hours after end of infusion, twice on study day 2, and daily on study days 3 to 7, 8, 15 and 22. Serum samples were analyzed in a gamma well counter. Elimination half-life (T1/2) was generated by fitting effective clearance to a monoexponential curve., Up to 22 days|Number of Pati…		Ludwig Institute for Cancer Research	National Cancer Institute (NCI)	FEMALE	ADULT, OLDER_ADULT	PHASE1	7	OTHER	INTERVENTIONAL	Allocation: NON_RANDOMIZED|Intervention Model: SEQUENTIAL|Masking: NONE|Primary Purpose: TREATMENT	CDR0000339682|MSKCC-03069|LUD2001-018	2024-11-03	2024-05-05	2006-11-15	2003-11-06	2021-12-21	2023-10-04	Memorial Sloan-Kettering Cancer Center, New York, New York, 10021, United States
NCT05979740	Disitamab vedotin	ERBB2	RC48 Combined With Toripalimab and Radiotherapy for Bladder Sparing Treatment in MIBC	https://clinicaltrials.gov/study/NCT05979740		RECRUITING	This is a prospective, open, single-center clinical study of RC48 combined with PD-1 and radiotherapy as bladder-preserving therapy in patients with muscular invasive bladder uroepithelial carcinoma with high HER-2 expression (IHC 2+ or 3+). The study was conducted in accordance with the Good Practice for Clinical Trials of Pharmaceutical Products (GCP). Six patients were enrolled in this study. …	NO	Muscle Invasive Bladder Cancer|HER2 Expression|Radiotherapy|PD-1|Antibody-drug Conjugates	DRUG: Disitamab Vedotin and Toripalimab	Safety, Adverse events will be defined according to NCI CTCAE, Version 5.0, Up to 28 days	Percent of Patients With Complete Response (CR), CR is defined by negative cystoscopy, urine cytology, and bladder biopsies., Up to 3 months|Percent of Patients With Complete Response (CR), CR is defined by negative cystoscopy, urine cytology, and bladder biopsies., Up to 12 months|Percent of Patients With Complete Response (CR), CR is defined by negative cystoscopy, urine cytology, and bladder b…		RenJi Hospital		ALL	ADULT, OLDER_ADULT	PHASE2	6	OTHER	INTERVENTIONAL	Allocation: NA|Intervention Model: SINGLE_GROUP|Masking: NONE|Primary Purpose: TREATMENT	LY2023-002-A	2023-08-01	2023-12-13	2024-02-13	2023-08-07		2023-08-31	Renji Hospital, School of Medicine, Shanghai Jiao Tong University, Shanghai, Shanghai, 200127, China
NCT05389462	Mipasetamab uzoptirine	AXL	A Study of Mipasetamab Uzoptirine (ADCT-601) in Participants With Solid Tumors	https://clinicaltrials.gov/study/NCT05389462		RECRUITING	The primary objective of this study is to identify the recommended phase 2 dose (RP2D) and/or the maximum tolerated dose (MTD), and characterize the safety and tolerability of ADCT-601 monotherapy and in combination with gemcitabine.	NO	Advanced Solid Tumors	DRUG: ADCT-601|DRUG: Gemcitabine	Safety and Tolerability as Assessed by Number of Participants with Adverse Events (AEs), Adverse events (AEs) and serious adverse events (SAEs) are defined as any untoward medical occurrence in participants whether or not considered related to the investigational medicinal product. Any clinically significant changes in vital signs, laboratory values, 12-lead electrocardiogram (ECG) and Eastern Co…	Overall Response Rate (ORR), Up to approximately 2 years|Duration of Response (DOR), Up to approximately 2 years|Progression-Free Survival (PFS), Up to approximately 2 years|Overall Survival (OS), Up to approximately 2 years|Serum Concentration of ADCT-601 Total Antibody, Pyrrolobenzodiazepine (PBD)-Conjugated Antibody, and Unconjugated Warhead SG3199, Day 1 up to approximately 2 years|Maximum Co…		ADC Therapeutics S.A.		ALL	ADULT, OLDER_ADULT	PHASE1	260	INDUSTRY	INTERVENTIONAL	Allocation: NON_RANDOMIZED|Intervention Model: SEQUENTIAL|Masking: NONE|Primary Purpose: TREATMENT	ADCT-601-102|2021-005566-18	2022-07-13	2024-08-26	2024-08-27	2022-05-25		2024-04-18	Sarcoma Oncology Research Center, Santa Monica, California, 90403, United States|Stanford Cancer Center, Stanford Medicine at Stanford University, Stanford, California, 94304, United States|University of IOWA, Iowa City, Iowa, 52242, United States|Washington University School of Medicine, Saint Louis, Missouri, 63110, United States|Sarah Cannon at University of Oklahoma Health Sciences Center, Ok…
NCT04972981	ADCT-901	KAAG1	A Study to Evaluate the Safety, Tolerability, Pharmacokinetics, and Antitumor Activity of ADCT-901 in Participants With Selected Advanced Solid Tumors	https://clinicaltrials.gov/study/NCT04972981		ACTIVE_NOT_RECRUITING	The primary objectives of this study are to identify the recommended phase 2 dose (RP2D) and/or maximum tolerated dose (MTD), and to characterize the safety and the tolerability of ADCT-901.	NO	Advanced Solid Tumors	DRUG: ADCT-901	Safety and Tolerability as Assessed by Number of Participants with Adverse Events (AEs), Adverse events (AEs) and serious adverse events (SAEs) were defined as any untoward medical occurrence in participants whether or not considered related to the investigational medicinal product. Any clinically significant changes in vital signs, laboratory values, 12-lead electrocardiogram (ECG) and Eastern C…	Overall Response Rate (ORR), Up to approximately 2.5 years|Duration of Response (DOR), Up to approximately 2.5 years|Progression-Free Survival (PFS), Up to approximately 2.5 years|Overall Survival (OS), Up to approximately 2.5 years|Maximum Concentration (Cmax) of ADCT-901 Total Antibody, Pyrrolobenzodiazepine (PBD)-Conjugated Antibody, and Unconjugated Warhead SG3199 in Serum, Up to approximatel…		ADC Therapeutics S.A.		ALL	ADULT, OLDER_ADULT	PHASE1	132	INDUSTRY	INTERVENTIONAL	Allocation: NON_RANDOMIZED|Intervention Model: SEQUENTIAL|Masking: NONE|Primary Purpose: TREATMENT	ADCT-901-101|2021-002292-19	2021-09-09	2024-04-06	2025-04-05	2021-07-22		2024-01-11	Sarah Cannon at HealthONE, Denver, Colorado, 80218, United States|Yale Cancer Center, New Haven, Connecticut, 06520, United States|Emory University, Winship Cancer Institute, Atlanta, Georgia, 30322, United States|Northwestern University, Chicago, Illinois, 60611, United States|University Hospitals of Cleveland Medical Center (UHCMC), Cleveland, Ohio, 44106, United States|Sarah Cannon at Universi…
NCT02529553	LY3076226	FGFR3	A Study of LY3076226 in Participants With Advanced or Metastatic Cancer	https://clinicaltrials.gov/study/NCT02529553		COMPLETED	The main purpose of this study is to evaluate the safety of the study drug known as LY3076226 in participants with advanced or metastatic cancer.	YES	Advanced Cancer|Metastatic Cancer	DRUG: LY3076226	Maximum Tolerated Dose (MTD) of LY3076226, The MTD was defined as the highest dose tested that had less than 33% probability of causing a dose limiting toxicity (DLT)., Cycle 1 (21 Days)	Pharmacokinetics (PK): Maximum Concentration (Cmax) of LY3076226, Predose: Day 1 (Cycle 1) and 63 (Cycle 3); Postdose: 0.05, 1, 3, 6, 24 and 72 hours|PK: Area Under the Concentration-Time Curve (AUC) of LY3076226, Predose: Day 1 (Cycle 1) and 63 (Cycle 3); Postdose: 0.05, 1, 3, 6, 24 and 72 hours|Number of Participants With Tumor Response, Tumor response was assessed using confirmed complete resp…		Eli Lilly and Company		ALL	ADULT, OLDER_ADULT	PHASE1	25	INDUSTRY	INTERVENTIONAL	Allocation: NA|Intervention Model: SINGLE_GROUP|Masking: NONE|Primary Purpose: TREATMENT	15383|I7O-MC-JOBA	2024-09-15	2018-03-28	2018-03-28	2015-08-20	2020-04-17	2020-04-17	Fox Chase Cancer Center, Philadelphia, Pennsylvania, 19111-2497, United States|Medical University of South Carolina, Charleston, South Carolina, 29425, United States|The START Center for Cancer Care, San Antonio, Texas, 78229, United States|For additional information regarding investigative sites for this trial, contact 1-888-545-5972 Mon - Fri, 9 AM to 4 PM or 1-877-CTLILLY (1-877-285-4559, 1-31…	Study Protocol, https://cdn.clinicaltrials.gov/large-docs/53/NCT02529553/Prot_000.pdf|Statistical Analysis Plan, https://cdn.clinicaltrials.gov/large-docs/53/NCT02529553/SAP_001.pdf
NCT04410224	ASN-004	5T4	Study of ASN004 in Patients With Advanced Solid Tumors	https://clinicaltrials.gov/study/NCT04410224	ASN004	COMPLETED	Participants in this study will receive ASN004 once every 3 or 4 weeks by intravenous infusion. The ASN004 dosing schedule may be modified based on emerging data and Safety Review Committee decision. The study will test various doses of ASN004 to find out the highest safe dose to test in future trials. Eligible subjects will be sequentially enrolled in cohorts at escalated doses.	NO	Solid Tumor	DRUG: ASN004	Determine the maximum tolerated dose of ASN004, The MTD will be determined by evaluating the number of subjects with treatment related adverse events (AEs) and DLTs., first 21 days for patients administered ASN004 every 3 weeks, and first 28 days for patients administered ASN004 every 4 weeks	Calculate the pharmacokinetic (PK) area under the plasma concentration of ASN004, Calculate the amount of ASN004 in the bloodstream, First 63 days|Calculate the maximum plasma concentration at steady state, Calculate the maximum amount of ASN004 in the bloodstream, First 63 days|Calculate the terminal elimination rate of ASN004, Calculate how fast ASN004 leaves the body, First 63 days|Change in t…	Correlate 5T4 oncofetal protein (5T4) expression and clinical efficacy, Number of patients with 5T4 expression that have a complete response, partial response or prolonged stable disease when receiving ASN004., Up to 1 year	Kirilys Therapeutics Inc.		ALL	ADULT, OLDER_ADULT	PHASE1	19	INDUSTRY	INTERVENTIONAL	Allocation: NA|Intervention Model: SEQUENTIAL|Masking: NONE|Primary Purpose: TREATMENT	ASN004-101	2022-04-08	2024-05-08	2024-05-08	2020-06-01		2024-07-10	Winship Cancer Institute of Emory University, Atlanta, Georgia, 30322, United States|NEXT Oncology, Austin, Texas, 78758, United States|NEXT Oncology, San Antonio, Texas, 78240, United States|Next Oncology, Fairfax, Virginia, 22031, United States
NCT00352131	Cantuzumab ravtansine	CD138	Maytansinoid DM4-Conjugated Humanized Monoclonal Antibody huC242 in Treating Patients With Solid Tumors	https://clinicaltrials.gov/study/NCT00352131		COMPLETED	RATIONALE: Monoclonal antibodies, such as maytansinoid DM4-conjugated humanized monoclonal antibody huC242, can block tumor growth in different ways. Some block the ability of tumor cells to grow and spread. Others find tumor cells and help kill them or carry tumor-killing substances to them. PURPOSE: This phase I trial is studying the side effects and best dose of maytansinoid DM4-conjugated hum…	NO	Non-colorectal Cancer|Pancreatic Cancer	DRUG: HuC242-DM4	Dose-limiting toxicity, for the duration of the trial|Maximum tolerated dose, for the duration of the trial	Toxicity, for the duration of the trial|Pharmacokinetics, for the duration of the trial|Antitumor activity, for the duration of the trial		ImmunoGen, Inc.		ALL	ADULT, OLDER_ADULT	PHASE1	50	INDUSTRY	INTERVENTIONAL	Allocation: NON_RANDOMIZED|Intervention Model: SINGLE_GROUP|Masking: NONE|Primary Purpose: TREATMENT	CDR0000491224|IMMUNO-101|IMMUNO-045-5011-228|UTHSC-IDD-0504	2024-02-05	2024-12-09	2024-12-09	2006-07-14		2010-03-17	South Texas Accelerated Research Therapeutics, San Antonio, Texas, 78229, United States|UT Health Science Center, San Antonio, Texas, 78245-3217, United States
NCT02751918	Anetumab ravtansine	Mesothelin	Phase Ib Study of Anetumab Ravtansine in Combination With Pegylated Liposomal Doxorubicin in Patients With Recurrent Mesothelin-expressing Platinum-resistant Cancer	https://clinicaltrials.gov/study/NCT02751918		COMPLETED	Anetumab ravtansine is developed for the treatment of patients with recurrent platinum-resistant ovarian cancer. The purpose of the proposed trial is to identify the maximum tolerated dose of anetumab ravtansine that could be safely combined with pegylated liposomal doxorubicin in this indication.	NO	Ovarian Neoplasms	DRUG: Anetumab ravtansine (BAY94-9343)|DRUG: Pegylated Liposomal Doxorubicin	Maximum tolerated dose (MTD) of Anetumab ravtansine in combination with pegylated liposomal doxorubicin when given every three weeks, MTD is defined as the highest dose of anetumab ravtansine administered in combination with pegylated liposomal doxorubicin that can be given such that not more than 1 of 6 subjects at a given dose level experiences a dose-limiting toxicity (DLT)., Up to 6 months, m…	AUC (area under the plasma concentration vs. time curve from zero to infinity after single (first) dose) of Anetumab ravtansine analytes (Antibody drug conjugates, Total Antibody, metabolites DM4, and DM4-Me), At pre-dose, 0.5h, 1h, 1.5h, 2h, 3h, 5h, 8h, 24h, 48h, 168h, 336h and 504h post-dose, beginning on day 1 of cycle 1|AUC(0-tlast) (AUC from time zero to the last data point > lower limit of …		Bayer		FEMALE	ADULT, OLDER_ADULT	PHASE1	65	INDUSTRY	INTERVENTIONAL	Allocation: NA|Intervention Model: SINGLE_GROUP|Masking: NONE|Primary Purpose: TREATMENT	18326	2016-06-08	2019-08-23	2019-10-31	2016-04-26		2019-11-22	Rocky Mountain Cancer Centers, Aurora, Colorado, 80012, United States|Yale University School of Medicine, New Haven, Connecticut, 06520-8064, United States|Oklahoma University Health Science Center, Oklahoma City, Oklahoma, 73104, United States|UZ Leuven Gasthuisberg, Leuven, 3000, Belgium|The Institute of Oncology, Chisinau, 2025, Moldova, Republic of|Ciutat Sanitària i Universitaria de la Vall …
NCT05838521	Sacituzumab Govitecan	TROP2	A Study of Sacituzumab Govitecan (IMMU-132) in Patients With Recurrent or Persistent Cervical Cancer	https://clinicaltrials.gov/study/NCT05838521		RECRUITING	This is a non-randomized Phase 2 study of sacituzumab govitecan (IMMU-132) in subjects with recurrent or persistent cervical cancer.	NO	Cervical Cancer	DRUG: Sacituzumab govitecan	Objective Response Rate (ORR), Objective response rate (complete response and partial response rates) by RECIST1.1 criteria in patients with recurrent or persistent cervical cancer., 4 Years	Duration of overall survival (OS), Overall survival is defined as the duration of time from study entry to death or the date of last contact., 6 Years|Duration of progression free survival (PFS), Progression free survival is defined as the duration of time from study entry to time of progression, death, or is censored at date of last disease assessment., 6 Years|Durable disease control rate (DDCR…		Yale University	Gilead Sciences	FEMALE	ADULT, OLDER_ADULT	PHASE2	20	OTHER	INTERVENTIONAL	Allocation: NA|Intervention Model: SINGLE_GROUP|Masking: NONE|Primary Purpose: TREATMENT	2000023639	2023-06-02	2026-06-01	2028-06-01	2023-05-01		2024-02-08	Smilow Cancer Hospital at Yale New Haven, New Haven, Connecticut, 06520, United States
NCT01393717	Brentuximab vedotin	CD30	Brentuximab Vedotin Before Autologous Stem Cell Transplant in Treating Patients With Hodgkin Lymphoma	https://clinicaltrials.gov/study/NCT01393717		COMPLETED	This phase II trial studies how well brentuximab vedotin before autologous (taken from an individual's own cells) stem cell transplant works in treating patients with Hodgkin lymphoma. Monoclonal antibody-drug conjugates, such as brentuximab vedotin, can block cancer growth in different ways by targeting certain cells.	YES	Recurrent Hodgkin Lymphoma|Refractory Hodgkin Lymphoma	DRUG: brentuximab vedotin	Overall Response Rate Among Patients With Salvage Brentuximab Vedotin (BV), The overall response rate is calculated as the percent of evaluable patients that have confirmed CR or PR by radiographic imaging, and the exact 95% confidence interval is calculated for this estimate. Per Revised Response Criteria for Malignant Lymphoma (Cheson et al. 2007) for target lesions and assessed by CT/PET scans…	Total CD34+ Cell Dose Among Patients Receiving Brentuximab Vedotin Followed by Autologous Hematopoietic Stem Cell Transplantation, Among the patients receiving salvage Brentuximab Vedotin (BV) followed by Autologous Hematopoietic Stem Cell Transplantation (AutoHCT), their total CD34+ cell yield by stem cell mobilization., 60 days after completion of last course of study treatment, up to condition…		City of Hope Medical Center	National Cancer Institute (NCI)	ALL	CHILD, ADULT, OLDER_ADULT	PHASE2	57	OTHER	INTERVENTIONAL	Allocation: NA|Intervention Model: SINGLE_GROUP|Masking: NONE|Primary Purpose: TREATMENT	11051|NCI-2011-01135	2011-10-20	2017-02-01	2017-02-01	2011-07-13	2018-04-26	2018-04-26	City of Hope Medical Center, Duarte, California, 91010, United States|Weill Medical College, Cornell University, New York, New York, 10065, United States	Study Protocol and Statistical Analysis Plan, https://cdn.clinicaltrials.gov/large-docs/17/NCT01393717/Prot_SAP_000.pdf
NCT03489525	MEDI2228	BCMA	MEDI2228 in Subjects With Relapsed/Refractory Multiple Myeloma	https://clinicaltrials.gov/study/NCT03489525	MEDI2228	COMPLETED	The purpose of this study is to assess the safety, pharmacokinetics and tolerability, describe the dose-limiting toxicities (DLTs), and determine the maximum tolerated dose (MTD) or maximum administered dose (MAD \[in the absence of establishing the MTD\]) for single agent MEDI2228 in adult subjects with multiple myeloma who are either transplant ineligible or post autologous stem cell transplant…	NO	Relapsed/Refractory Multiple Myeloma	BIOLOGICAL: Dose Escalation, MEDI2228, ADC (antibody drug conjugate)|BIOLOGICAL: Dose Expansion, MEDI2228, ADC (antibody drug conjugate)	Occurrence of adverse events (AEs), To assess by the occurrence of adverse events (AEs), From time of informed consent through 90 days post end of treatment|Occurrence of SAE (serious adverse events), To assess the occurrence of serious adverse events (SAEs), From time of informed consent through 90 days post end of treatment|Occurrence of DLTs (dose limiting toxicities), To assess by the occurre…	MEDI2228 maximum observed concentration for PK, To assess the pharmacokinetics of MEDI2228, From time of informed consent through 60 days post end of treatment|MEDI2228 area under the concentration-time curve for PK, To assess the pharmacokinetics of MEDI2228, From time of informed consent through 60 days post end of treatment|MEDI2228 clearance for PK, To assess the pharmacokinetics of Medi2228,…		MedImmune LLC		ALL	ADULT, OLDER_ADULT	PHASE1	107	INDUSTRY	INTERVENTIONAL	Allocation: NON_RANDOMIZED|Intervention Model: SEQUENTIAL|Masking: NONE|Primary Purpose: TREATMENT	D7900C00001	2018-05-08	2022-03-21	2022-03-21	2018-04-05		2022-03-28	Research Site, Phoenix, Arizona, 85054, United States|Research Site, Jacksonville, Florida, 32224, United States|Research Site, Boston, Massachusetts, 02114, United States|Research Site, Boston, Massachusetts, 02215, United States|Research Site, Detroit, Michigan, 48201, United States|Research Site, Rochester, Minnesota, 55905, United States|Research Site, Charlotte, North Carolina, 28204, United…
NCT05367635	SKB315	Claudin 18.2	A Study of SKB315 in Patients With Advanced Solid Tumors	https://clinicaltrials.gov/study/NCT05367635		RECRUITING	This is a multicenter, open-label, multiple-dose dose finding and expansion study to evaluate the safety, tolerability, pharmacokinetic(PK) profile, and anti-tumor efficacy of SKB315 for injection in patients with advanced solid tumors.	NO	Advanced Solid Tumors	DRUG: SKB315 for injection	Phase 1a: Dose Limiting Toxicities (DLT), Incidence of Dose Limiting Toxicities, From data of initial dose until up to 21/28 days for treatment|Phase 1b: Objective Response Rate (ORR), The sum of the number of cases with Complete Response (CR) and Partial Response (PR) in all treated tumor patients (CR + PR) divided by the total number of cases., Up to 2 years	Progression Free Survival (PFS), PFS: Time from start of treatment to progression of disease (PD) or death, whichever occurs first, in patients with tumors., Up to 2 years|Duration of Response (DOR), DOR: Time from the start of the first assessment of CR or PR in tumor patients to PD or death due to any reason., Up to 2 years|Overall Survival (OS), OS: Time from start of treatment to death due to…		Sichuan Kelun Pharmaceutical Research Institute Co., Ltd.		ALL	ADULT, OLDER_ADULT	PHASE1	206	INDUSTRY	INTERVENTIONAL	Allocation: NON_RANDOMIZED|Intervention Model: SINGLE_GROUP|Masking: NONE|Primary Purpose: TREATMENT	SKB315-I-01	2022-03-16	2024-05-31	2024-05-31	2022-05-10		2023-10-24	Tianjin Medical University Cancer Institute & Hospital, Tianjin, Tianjin, 300060, China
NCT04189211	BAT8001	ERBB2	A Clinical Trial of BAT8001 on Safety, Tolerability and Pharmacokinetics for Patients	https://clinicaltrials.gov/study/NCT04189211		UNKNOWN	An Open-Label, Dose Escalation Phase I Clinical Trial on Safety, Tolerability and Pharmacokinetics of BAT8001 for Injection in Patients with HER2-Positive Solid Tumors (breast cancer or gastric cancer)。	NO	HER2-Positive Solid Tumors	DRUG: BAT8001	Dose-limiting toxicity（DLT）, DLT is defined as one of the following as per investigator related to study drug: 1. Grade ≥ 3 non-hematologic, and non-liver organ toxicities (except for Grade 3 diarrhea, nausea and vomiting in the absence of prophylactics); 2. Grade ≥ 3 cardiotoxicity, new segmental wall-motion abnormalities, or troponin I ≥ 0.2 ng/mL; 3. Left ventricular ejection fraction (LVEF) ≤…	Progression free survival time(PFS), PFS is defined as the time from first dose date until the date of disease progression or death due to any reason, whichever occurs first., Baseline to the end of the study (up to 3 years)|Overall response rate(ORR), determined by the investigator according to Response Evaluation Criteria in Solid Tumors (RECIST) v1.1., Baseline to the end of the study (up to 3…		Bio-Thera Solutions		ALL	ADULT, OLDER_ADULT	PHASE1	30	INDUSTRY	INTERVENTIONAL	Allocation: NON_RANDOMIZED|Intervention Model: SEQUENTIAL|Masking: NONE|Primary Purpose: TREATMENT	BAT-8001-001-CR	2017-03-07	2019-12-31	2020-12-31	2019-12-06		2019-12-06	Sun Yat-sen University Cancer Center, Guangzhou, Guangdong, 510060, China
NCT03248492	Trastuzumab deruxtecan	ERBB2	A Study of DS-8201a in Metastatic Breast Cancer Previously Treated With Trastuzumab Emtansine (T-DM1)	https://clinicaltrials.gov/study/NCT03248492		ACTIVE_NOT_RECRUITING	Some human epidermal growth factor receptor 2 (HER-2) breast cancer patients do not respond or become resistant to current treatment. DS-8201a is a new experimental product that is a combination of an antibody and a drug. It has not yet been approved for use. DS-8201a may slow down tumor growth. This might improve outcomes for these patients.	YES	Breast Cancer	DRUG: DS-8201a	Objective Response Rate as Confirmed by Independent Central Review Following Intravenous Administration of 5.4 mg/kg DS-8201a in Participants With Metastatic Breast Cancer (Enrolled Analysis Set), The number of participants with objective response was assessed every six weeks from Cycle 1 Day 1 through discontinuation of treatment, by independent central imaging facility review based on RECIST ve…	Objective Response Rate as Confirmed By the Investigator Following Intravenous Administration of DS-8201a in Participants With Metastatic Breast Cancer (Enrolled Analysis Set), The number of participants with objective response is assessed every six weeks from Cycle 1 Day 1 through discontinuation of treatment. Investigator-assessed objective response rate (ORR) was defined as the proportion of p…		Daiichi Sankyo	AstraZeneca|Daiichi Sankyo Co., Ltd.	ALL	ADULT, OLDER_ADULT	PHASE2	253	INDUSTRY	INTERVENTIONAL	Allocation: RANDOMIZED|Intervention Model: PARALLEL|Masking: NONE|Primary Purpose: TREATMENT	DS8201-A-U201|2016-004986-18|JapicCTI-173693(en)|DESTINY-Breast01	2017-08-25	2019-03-21	2024-05-31	2017-08-14	2020-02-17	2023-11-15	Alaska Urological Institute dba Alaska Clinical Research Center, Anchorage, Alaska, 99508, United States|Arizona Oncology Associates, Tucson, Arizona, 85704, United States|The Regents of the University of California, Los Angeles, California, 90095, United States|Sharp Clinical Oncology Research, San Diego, California, 92123, United States|University of California San Francisco, San Francisco, Cal…	Study Protocol and Statistical Analysis Plan, https://cdn.clinicaltrials.gov/large-docs/92/NCT03248492/Prot_SAP_000.pdf
NCT06415487	ACE2016-001	EGFR	ACE2016 in Adult Subjects With Locally Advanced or Metastatic Solid Tumors Expressing Epidermal Growth Factor Receptor (EGFR)	https://clinicaltrials.gov/study/NCT06415487		NOT_YET_RECRUITING	ACE2016 is an off-the-shelf, allogeneic gamma delta T (gdT) cell therapy derived from healthy donors, that is under investigation for the treatment of Locally Advanced or Metastatic Solid Tumors Expressing Epidermal Growth Factor Receptor (EGFR). The ACE2016-001 study is an open-label, Phase I, first-in-human (FIH) study that aims to evaluate the safety and tolerability, persistency, pharmacodyna…	NO	Locally Advanced Solid Tumor|Metastatic Solid Tumor	DRUG: Cyclophosphamide|DRUG: Fludarabine|DRUG: ACE2016|DRUG: Pembrolizumab	Incidence of DLTs, AESIs, Grade 3 or higher TEAEs, TEAEs considered related to ACE2016, TEAEs resulting in death, SAEs, related SAEs, and TEAEs leading to treatment discontinuation will be summarized by cohort, 1 year|Change from baseline in clinical laboratory tests results, Number of subject with change from baseline clinical significant lab findings by cohort (descriptive), 1 year|Change from …	Persistence of ACE2016 before and after administration, Half-life of ACE2016, 1 year|Measure of anti-ACE2016 antibodies after administration, Titration of anti-ACE2016 antibodies after administration, 1 year|Objective Response Rate (ORR), Proportion of subjects assessed as having a complete response (CR) or partial response (PR) according to RECIST v1.1, 1 year|Disease Control Rate (DCR), Number …	Pharmacodynamics of ACE2016, Change from baseline IL2,6,8,10 IFN TNF, and change in TBNK cell subsets., 1 year|gdT infiltration in tumor mass, Optional biopsy to examine gdT cell infiltration, 1 year	Acepodia Biotech, Inc.		ALL	ADULT, OLDER_ADULT	PHASE1	30	INDUSTRY	INTERVENTIONAL	Allocation: NON_RANDOMIZED|Intervention Model: SEQUENTIAL|Masking: NONE|Primary Purpose: TREATMENT	ACE2016-001	2024-05-31	2026-12-18	2027-03-25	2024-05-16		2024-05-16	SCRI Denver Drug Development Unit, Denver, Colorado, 80218, United States|Sarah Cannon Research Institute (SCRI) Oncology Partners, Nashville, Tennessee, 37203, United States
NCT05011188	FOR46	CD46	FOR46 in Combination With Enzalutamide in Patients With Metastatic Castration Resistant Prostate Cancer	https://clinicaltrials.gov/study/NCT05011188		RECRUITING	This is a Phase 1b/2 study evaluating FOR46 in combination with enzalutamide in patients with metastatic castration resistant prostate cancer (mCRPC) after prior progression on abiraterone. FOR46 is designed to target and bind to CD46, a transmembrane cellular protein expressed at moderate or high levels in numerous cancer types. The investigators hypothesize that the combination of FOR46 plus en…	NO	Metastatic Castration-resistant Prostate Cancer|Prostate Cancer	BIOLOGICAL: FOR46|BIOLOGICAL: Enzalutamide|DRUG: Pegfilgrastim	Maximally tolerated dose (MTD) (Phase 1b), A minimum of 3 patients will be treated at each dose level. If \< 33%of patients (i.e. 0 of 3 patients, or 1 of 6 patients) within a cohort have a dose-limiting toxicity (DLT in Cycle 1, then enrollment of the next cohort may commence upon approval of Data and Safety Monitoring Committee. At any dose level, dose escalation will be discontinued if \>= 2 o…	Proportion of participants with a greater than or equal to 50% change in PSA (PSA50), PSA50 response is defined as above, a ≥ 50% decline from baseline in serum PSA, confirmed by repeat measurement ≥ 4 weeks later. The PSA50 response proportion will be reported along with 95% confidence interval for each study cohort, for the subset of PSA-evaluable patients (serum PSA ≥ 2 ng/mL at baseline), Up …		Rahul Aggarwal	Fortis Therapeutics, Inc.	MALE	ADULT, OLDER_ADULT	PHASE1|PHASE2	36	OTHER	INTERVENTIONAL	Allocation: NON_RANDOMIZED|Intervention Model: SEQUENTIAL|Masking: NONE|Primary Purpose: TREATMENT	21555|NCI-2021-08857	2022-01-19	2027-03-31	2027-03-31	2021-08-18		2023-09-15	University of California, San Francisco, San Francisco, California, 94143, United States
NCT02487979	Glembatumumab Vedotin	GPNMB	Glembatumumab Vedotin in Treating Patients With Recurrent or Refractory Osteosarcoma	https://clinicaltrials.gov/study/NCT02487979		COMPLETED	This phase II trial studies how well glembatumumab vedotin works in treating patients with osteosarcoma that has come back (recurrent) or does not respond to treatment (refractory). Monoclonal antibodies, such as glembatumumab vedotin, may find tumor cells and help kill them.	YES	Recurrent Osteosarcoma	DRUG: Glembatumumab Vedotin|OTHER: Laboratory Biomarker Analysis|OTHER: Pharmacological Study	Disease Control Success, The number of patients who do not experience disease progression or death in the six cycles following enrollment on AOST1521, First six cycles (21-day cycle) of protocol therapy	Toxicity Associated With Chemotherapy, The number of cycles aggregated across all patients where CTC Version 4 grade 3 or higher., Duration of protocol therapy - Up to two years|Pharmacokinetics of Glembatumumab Vedotin: Total Antibody and Antibody-drug Conjugate Half-life, Total antibody and antibody-drug conjugate half-life are estimated from the sampling time points: Before first dose (Baselin…		National Cancer Institute (NCI)		ALL	CHILD, ADULT	PHASE2	22	NIH	INTERVENTIONAL	Allocation: NA|Intervention Model: SINGLE_GROUP|Masking: NONE|Primary Purpose: TREATMENT	NCI-2015-01037|NCI-2015-01037|AOST1521|s16-01136|AOST1521|AOST1521|U10CA180886	2016-02-16	2017-06-30	2021-12-31	2015-07-02	2018-10-15	2022-01-18	Children's Hospital of Alabama, Birmingham, Alabama, 35233, United States|Banner University Medical Center - Tucson, Tucson, Arizona, 85719, United States|University of Arizona Cancer Center-North Campus, Tucson, Arizona, 85719, United States|Arkansas Children's Hospital, Little Rock, Arkansas, 72202-3591, United States|Kaiser Permanente-Anaheim, Anaheim, California, 92806, United States|PCR Onco…	Study Protocol and Statistical Analysis Plan, https://cdn.clinicaltrials.gov/large-docs/79/NCT02487979/Prot_SAP_000.pdf
NCT05948865	CPO-301	EGFR	A Phase 1 Study of CPO301 in Adult Patients With Advanced or Metastatic Solid Tumors	https://clinicaltrials.gov/study/NCT05948865		RECRUITING	The goal of this clinical trial is to test CPO301, a type of drug called an antibody drug conjugate in adult patients with advanced or metastatic solid tumors. The main questions it aims to answer are: * To assess the safety and tolerability of CPO301 at increasing doses and determine the dose to be used in the second part of the study (Part A) * To assess the safety and tolerability of CPO301 at…	NO	Cancer|Cancer, Lung	DRUG: CPO301	To determine the dose to be used in Part B (RP2D), To determine the recommended dose of CPO301 to be used as monotherapy in Part B (RP2D), through study completion, an average of 1 year|Safety and tolerability at RP2D of CPO301 as monotherapy, as measured by Incidence and severity of AEs per CTCAEv5.0, through study completion, an average of 1 year	Pharmacokinetics (PK), The pharmacokinetics (PK) profile of CPO301 will be assessed by measuring the blood concentration of the drug in the plasma at various timepoints and calculation of parameters, such as Peak Plasma Concentration (Cmax), through study completion, an average of 1 year|Expression of anti-drug antibody (ADA), The expression of anti-drug antibodies (ADAs) following administration…	Parts A and B, Exploratory: Correlatives, To explore the correlation between EGFR status (different mutations, or amplification levels) and efficacy in patients with advanced solid tumors and biomarkers relevant to CPO301 efficacy, through study completion, an average of 1 year	Conjupro Biotherapeutics, Inc.		ALL	ADULT, OLDER_ADULT	PHASE1	102	INDUSTRY	INTERVENTIONAL	Allocation: NON_RANDOMIZED|Intervention Model: SEQUENTIAL|Masking: NONE|Primary Purpose: TREATMENT	CPO301-US-101	2023-06-06	2025-06-13	2025-12-12	2023-07-17		2024-07-03	USC Norris Comprehensive Cancer Center, Los Angeles, California, 90033, United States|Hoag Memorial Hospital Presbyterian, Newport Beach, California, 92658, United States|UCLA Hematology/Oncology - Santa Monica, Santa Monica, California, 90404, United States|Sarah Cannon Research Institute (SCRI) at HealthONE, Denver, Colorado, 80218, United States|AdventHealth Cancer Institute, Celebration, Flor…
NCT06188468	68Ga-THP-Trop-2 VHH	TROP2	ImmunoPET Targeting Trophoblast Cell-surface Antigen 2 (Trop-2) in Solid Tumors	https://clinicaltrials.gov/study/NCT06188468		RECRUITING	The objective of the study is to construct a noninvasive approach 68Ga-THP-Trop2 VHH PET/CT to detect the Trop-2 expression of tumor lesions in patients with Solid tumors and to identify patients benefiting from Trop-2 targeting antibody-drug conjugate treatment.	NO	Tumor|Solid Tumor|Positron-Emission Tomography	DIAGNOSTIC_TEST: standard-of-care imaging (18F-FDG, 68Ga-PSMA, or 68Ga-DOTATATE PET/CT), 68Ga-THP-Trop2 VHH PET/CT	Diagnostic efficacy, The sensitivity, specificity, and accuracy of standard-of-care imaging (18F-FDG, 68Ga-PSMA, or 68Ga-DOTATATE PET/CT) and 68Ga-THP-Trop2 VHH PET/CT were calculated and compared to evaluate the diagnostic accuracy., 2 years	Number of lesions, The numbers of positive primary and metastatic lesions of standard-of-care imaging (18F-FDG, 68Ga-PSMA, or 68Ga-DOTATATE PET/CT) and 68Ga-THP-Trop2 VHH PET/CT were recorded by visual interpretation., 2 years|SUV, Standardized uptake value (SUV) of standard-of-care imaging (18F-FDG, 68Ga-PSMA, or 68Ga-DOTATATE PET/CT) and 68Ga-THP-Trop2 VHH PET/CT for each target lesion of subje…		The First Affiliated Hospital of Xiamen University		ALL	ADULT, OLDER_ADULT	NA	90	OTHER	INTERVENTIONAL	Allocation: NA|Intervention Model: SINGLE_GROUP|Masking: NONE|Primary Purpose: DIAGNOSTIC	XMYY-2023KY146	2023-10-01	2024-10-01	2025-10-01	2024-01-03		2024-04-16	The First Affiliated Hospital of Xiamen University, Xiamen, Fujian, 361003, China
NCT06400472	LY4170156	FOLR1	A Study of LY4170156 in Participants With Selected Advanced Solid Tumors	https://clinicaltrials.gov/study/NCT06400472		RECRUITING	The purpose of this study is to find out whether the study drug, LY4170156, is safe, tolerable and effective in participants with advanced solid tumors. The study is conducted in two parts - phase Ia (dose-escalation, dose-optimization) and phase Ib (dose-expansion). The study will last up to approximately 4 years.	NO	Ovarian Neoplasms|Endometrial Neoplasms|Uterine Cervical Neoplasms|Carcinoma, Non-Small-Cell Lung|Triple Negative Breast Neoplasms|Pancreatic Neoplasm|Colorectal Neoplasms	DRUG: LY4170156	Phase 1a: To determine the recommended phase 2 dose (RP2D) of LY4170156, Number of participants with dose-limiting toxicities (DLTs), First 4 Cycles (21 days)|Phase 1a: To determine the RP2D or optimal dose of LY4170156, Number of participants with DLTs, First 4 Cycles (21 days)|Phase 1b: To assess the antitumor activity of LY4170156 Monotherapy: Overall response rate (ORR), ORR per investigator …	To characterize the pharmacokinetics (PK) properties of LY4170156: Minimum Plasma Concentration (Cmin), PK: Cmin of LY4170156, First 4 Cycles (21 days)|To characterize the PK properties of LY4170156: Area under the concentration versus time curve (AUC), PK: AUC of LY4170156, First 4 Cycles (21 days)|To evaluate the preliminary antitumor activity of LY4170156: Overall response rate (ORR), ORR per …		Eli Lilly and Company	Loxo Oncology, Inc.	ALL	ADULT, OLDER_ADULT	PHASE1	220	INDUSTRY	INTERVENTIONAL	Allocation: RANDOMIZED|Intervention Model: PARALLEL|Masking: NONE|Primary Purpose: TREATMENT	LOXO-FRA-24001|2024-511238-11-00|J5E-OX-JZXA	2024-05-06	2024-02-27	2024-04-27	2024-05-06		2024-07-03	South Texas Accelerated Research Therapeutics (START), Grand Rapids, Michigan, 49546, United States|START Mountain Region, West Valley City, Utah, 84119, United States
NCT04868344	MRG003	EGFR	A Study of MRG003 in Patients With Advanced Solid Tumors	https://clinicaltrials.gov/study/NCT04868344		COMPLETED	The objective of this study is to assess the safety, efficacy, and pharmacokinetics of MRG003, as well as immunogenicity as defined by the incidence of anti-drug antibody (ADA) of MRG003 in patients with advanced solid tumors, including colorectal cancer, squamous cell carcinoma of head and neck, and nasopharyngeal carcinoma.	NO	Advanced Solid Tumors	DRUG: MRG003	Dose Limiting Toxicity (DLT) - Phase Ia, DLT is assessed on Day 21 (Day 1 to 21) of the first dose administration., First cycle (21 days)|Objective Response Rate (ORR) - Phase Ib, ORR was defined as the proportions of subjects with a complete response (CR) and partial response (PR). ORR will be assessed by investigator according to RECIST v1.1., Baseline to study completion (up to 24 weeks)	PK parameter for MRG003: Maximum Drug Concentration (Cmax), Cmax will be derived from the PK blood samples collected and will be summarized with descriptive statistics., Baseline to study completion (up to 24 weeks)|PK parameter for MRG003: Area Under the Curve Up to the Last Validated Measurable Plasma Concentration (AUClast), AUClast will be derived from the PK blood samples collected and will …		Shanghai Miracogen Inc.		ALL	ADULT, OLDER_ADULT	PHASE1	61	INDUSTRY	INTERVENTIONAL	Allocation: NA|Intervention Model: SINGLE_GROUP|Masking: NONE|Primary Purpose: TREATMENT	MRG003-001	2018-05-09	2021-03-29	2021-03-29	2021-04-30		2021-04-30	Sun Yat-sen University Cancer Center, Guangzhou, Guangdong, 510060, China
NCT02134197	Lupartumab Amadotin	LYPD3	Dose-escalation Study of Lupartumab Amadotin (BAY1129980)	https://clinicaltrials.gov/study/NCT02134197		TERMINATED	The purpose of this study is to evaluate: * The side effects of BAY1129980 when given every 21 days different dose levels. * Determine the dose level of BAY1129980 that should be tested in future clinical research studies. * Measure how much BAY1129980 is in the blood at specific times after administration. * If treatment with BAY1129980 shows any effect on reducing the tumor growth. * If there a…	NO	Neoplasms	DRUG: Lupartumab Amadotin (BAY1129980)	Maximum tolerated dose (MTD), MTD is defined as the maximum dose at which the incidence of DLTs (dose limiting toxicities) during Cycle 1 is below 20%, or the maximum dose administered, whichever is achieved first during dose escalation., 21 days|Number of participants with adverse events as a measure of safety and tolerability, Up to 2 years	C4.4a expression levels in tumour tissue as measured by immunohistochemistry (IHC), Baseline|Tumor response evaluation following RECIST 1.1 criteria, Up to 2 years|Plasma concentration of BAY1129980 characterized by AUC (0-tlast), 2 years|Antidrug and antibody titer, Baseline and up to 2 years		Bayer		ALL	ADULT, OLDER_ADULT	PHASE1	69	INDUSTRY	INTERVENTIONAL	Allocation: NA|Intervention Model: SINGLE_GROUP|Masking: NONE|Primary Purpose: TREATMENT	16044	2014-05-22	2018-08-30	2018-08-30	2014-05-09		2019-12-11	La Jolla, California, 92093, United States|Stanford, California, 94305, United States|Aurora, Colorado, 80045, United States|Washington, District of Columbia, 20007-2197, United States|Gainesville, Georgia, 32610, United States|Westwood, Kansas, 66205, United States|Hackensack, New Jersey, 07601, United States|Buffalo, New York, 14263, United States|New York, New York, United States|Durham, North…
NCT05464030	M9140	CEACAM5	Anti-CEACAM5 ADC M9140 in Advanced Solid Tumors (PROCEADE-CRC-01)	https://clinicaltrials.gov/study/NCT05464030		RECRUITING	The purpose of this first-in-human study is to evaluate the safety, tolerability, pharmacokinetics, and preliminary clinical activity of M9140 in advanced solid tumors. This study contains 2 parts: Dose escalation (Part 1) and dose expansion (Part 2). Study details include: * Study Duration per participant: Approximately 4 months for Part 1 and 8 months for Part 2 * M9140 is not available through…	NO	Colorectal Cancer	DRUG: M9140|DRUG: M9140|DRUG: Bevacizumab|DRUG: Capecitabine	Part 1: Number of Participants with Dose Limiting Toxicities (DLTs) and Adverse Events (AEs), up to 4 months|Part 1: Recommended Dose Expansion (RDE) of M9140, up to 4 months|Parts 2B and 2C: Number of Participants with Dose Limiting Toxicities (DLTs) and Adverse Events (AEs), up to 8 months|Part 2A: Number of Participants with Adverse Events (AEs), up to 8 months|Part 2A: Objective Response (OR)…	Parts 1 and 2: Pharmacokinetic (PK) Plasma Concentrations of M9140, Part 1: Pre-dose up to 4 months; Part 2: Pre-dose up to 8 months|Parts 1 and 2: Number of Participants with Anti-Drug Antibodies (ADA) Against M9140, Part 1: up to 4 months; Part 2: up to 8 months|Parts 1 and 2: Levels of Titers of Anti-Drug Antibody (ADA) Against M9140, Part 1: up to 4 months; Part 2: up to 8 months|Parts 1 and …		EMD Serono Research & Development Institute, Inc.	Merck KGaA, Darmstadt, Germany	ALL	ADULT, OLDER_ADULT	PHASE1	180	INDUSTRY	INTERVENTIONAL	Allocation: NON_RANDOMIZED|Intervention Model: SEQUENTIAL|Masking: NONE|Primary Purpose: TREATMENT	MS202329_0001|2022-500508-23-00	2022-08-04	2026-02-27	2026-02-27	2022-07-19		2024-06-17	MD Anderson Cancer Center - Oncology, Houston, Texas, 77030, United States|NEXT Oncology, San Antonio, Texas, 78229, United States|National Cancer Center Hospital - Dept of Gastroenterology, Chuo-ku, Japan|Hospital Clinic de Barcelona, Barcelona, Spain|Hospital Universitari Vall d'Hebron - VHIR, Barcelona, Spain|Hospital Universitario Quironsalud Madrid - NEXT Oncology, Madrid, Spain
NCT05872295	IKS014	ERBB2	IKS014 in Advanced Solid Tumors That Express HER2	https://clinicaltrials.gov/study/NCT05872295		RECRUITING	This study will evaluate the recommended dose for further clinical development, safety, tolerability, anti-tumor activity, immunogenicity, pharmacokinetics and pharmacodynamics of IKS014, a HER2 targeting antibody-drug conjugate, in patients with advanced solid tumors.	NO	Breast Cancer|Gastric Cancer|Gastroesophageal-junction Cancer	DRUG: IKS014	Recommended Phase 2 Dose (Part 1), Based on tolerability, preliminary anti-tumor activity, and pharmacokinetics, Up to 24 months|Objective Response Rate (Part 2), Anti-tumor activity will be assessed by RECIST 1.1, Up to 24 months	Objective Response Rate (Part 1), Anti-tumor activity will be assessed by RECIST 1.1, Up to 24 months|Plasma Concentrations of IKS014 (Part 1 and 2), Pharmacokinetic parameters will be determined from observed concentrations of IKS014, Up to 48 months|Evaluation of the immunogenicity of IKS014 (Part 1 and 2), Occurrence of ADA measured in serum at selected timepoints during the study, Up to 48 mo…		Iksuda Therapeutics Ltd.		ALL	ADULT, OLDER_ADULT	PHASE1	165	INDUSTRY	INTERVENTIONAL	Allocation: NON_RANDOMIZED|Intervention Model: SEQUENTIAL|Masking: NONE|Primary Purpose: TREATMENT	IKS014-01	2023-09-14	2024-09-25	2024-09-27	2023-05-24		2023-12-18	Concord Repatriation General Hospital Medical Oncology Clinical Trials Unit, Concord, New South Wales, 2139, Australia|Westmead Hospital, Westmead, New South Wales, 2145, Australia|Peninsula & South Eastern Haematology and Oncology Group (PSEHOG), Frankston, Victoria, 3199, Australia|Alfred Health, Melbourne, Victoria, 3004, Australia|Linear Clinical Research, Nedlands, Western Australia, 6009, A…
NCT06112704	HS-20093	CD276	HS-20093 in Patients With Advanced Esophageal Carcinoma and Other Advanced Solid Tumors	https://clinicaltrials.gov/study/NCT06112704		RECRUITING	HS-20093 is a humanized IgG1 antibody-drug conjugate (ADC) which specifically binds to B7-H3, a target wildly expressed on solid tumor cells. The objectives of this study are to investigate the anti-tumor activity, safety, pharmacokinetics and immunogenicity of HS-20093 in Chinese advanced esophageal carcinoma and other solid tumor patients.	NO	Advanced Solid Tumor	DRUG: HS-20093	Objective response rate (ORR) determined by investigators according to Response Evaluation Criteria in Solid Tumors (RECIST) 1.1., ORR was defined as the percentage of participants who achieved a best overall response (BOR) of confirmed Complete Response (CR) or Partial Response (PR), assessed by investigators based on RECIST version 1.1\[Confirmed CR/PR assessment require at least one repeat (≥4…	DOR assessed by RECIST 1.1 criteria, DOR was defined as the period from the first occurrence of CR or PR to PD or death from any cause. If no PD or death after CR/PR, the cut-off date of progression-free survival (PFS) would be used \[Confirmed CR/PR assessment require at least one repeat (≥4 weeks), From the first dose up to PD or death, whichever came first, assessed up to 24 months.|Disease Co…		Hansoh BioMedical R&D Company		ALL	ADULT, OLDER_ADULT	PHASE2	220	INDUSTRY	INTERVENTIONAL	Allocation: NON_RANDOMIZED|Intervention Model: SEQUENTIAL|Masking: NONE|Primary Purpose: TREATMENT	HS-20093-203	2024-02-06	2026-07-31	2026-12-31	2023-11-01		2024-02-28	Henan Cancer Hospital, Zhengzhou, Henan, 450000, China
NCT05245006	89Zr-DFO-YS5	CD46	PET Imaging Study of 89Zr-DFO-YS5 in Men With Prostate Cancer	https://clinicaltrials.gov/study/NCT05245006		RECRUITING	CD46 is an exciting new therapeutic target in prostate cancer, with the antibody drug conjugate FOR46 under investigation in phase I clinical trials. The hypothesis of the study is that CD46 expression, measured via our novel imaging biomarker, is a characteristic feature of mCRPC, and particularly common in the most lethal forms of the disease including adenocarcinoma and Small-cell neuroendocri…	NO	Prostate Cancer|Metastatic Castration-resistant Prostate Cancer	DRUG: 89Zr-DFO-YS5|BIOLOGICAL: YS5 antibody|PROCEDURE: Positron Emission Tomography (PET)/Computerized tomography (CT)|PROCEDURE: Positron Emission Tomography (PET)/Magnetic Resonance Imaging (MRI)	Optimal time point for imaging using 89Zr-DFO-YS5 PET post-injection (Cohort A), For Cohort A, the optimal time point will be selected based on optimal maximun Standardized uptake value (SUVmax) of metastatic lesions, and ratio of SUVmax to blood pool. Due to the limited samples, the investigator will use all available lesions without considering the location of the lesions or the possible intra-…	Proportion of participants with treatment-related Adverse Events, The frequency and severity of adverse events following Zr-DFO-YS5 injection will be descriptively reported, using CTCAE version 5.0, Up to 3 weeks after last dose administration, approximately 35 days|Average organ uptake of 89Zr-DFO-YS5 (Cohort C & D), Average organ uptake of 89Zr-DFO-YS5 on PET will be estimated., Up to 24 months…		Robert Flavell, MD, PhD	United States Department of Defense|Fortis Therapeutics, Inc.	ALL	ADULT, OLDER_ADULT	PHASE1	24	OTHER	INTERVENTIONAL	Allocation: NON_RANDOMIZED|Intervention Model: SEQUENTIAL|Masking: NONE|Primary Purpose: DIAGNOSTIC	209210|NCI-2022-01310	2022-03-18	2025-12-31	2025-12-31	2022-02-17		2024-05-31	University of California, San Francisco, San Francisco, California, 94143, United States
NCT03366428	Trastuzumab deruxtecan	ERBB2	Phase 1 Study to Evaluate the Effect of DS-8201a on the QT/QTc Interval and Pharmacokinetics in HER2-Expressing Breast Cancer	https://clinicaltrials.gov/study/NCT03366428		COMPLETED	This study will look at the effect on the QTc interval and pharmacokinetics after multiple dosing in subjects with HER2-expressing metastatic and/or unresectable breast cancer.	YES	Malignant Neoplasm of Breast	DRUG: DS-8201a	Changes in QTcF After Treatment With DS-8201a in Participants With HER2-expressing Metastatic and/or Unresectable Breast Cancer, The number of participants with notable electrocardiogram changes meeting predefined criteria is being reported., Screening (within 7 days before enrollment) up to Cycle 3 Day 15 (each cycle is 21 days)|Pharmacokinetic Parameters of Maximum Serum Concentration (Cmax) Af…	Objective Response Rate Based on The Investigator's Assessment (Unconfirmed) Following DS-8201a Treatment in Participants With HER2-expressing Metastatic and/or Unresectable Breast Cancer, Objective response rate (ORR) was defined as unconfirmed complete response (CR) and partial response (PR) as assessed by the investigator based on Response Evaluation Criteria In Solid Tumors (RECIST) version 1…		Daiichi Sankyo Co., Ltd.	AstraZeneca	ALL	ADULT, OLDER_ADULT	PHASE1	51	INDUSTRY	INTERVENTIONAL	Allocation: NA|Intervention Model: SINGLE_GROUP|Masking: NONE|Primary Purpose: TREATMENT	DS8201-A-J102|173791	2017-12-26	2018-12-05	2021-02-19	2017-12-08	2021-06-14	2022-04-12	Kanagawa Cancer Center, Yokohama, Kanagawa, 241-8515, Japan|National Cancer Center Hospital, Chuo Ku, Tokyo, 104-0045, Japan|The Cancer Institute Hospital of Japanese Foundation For Cancer Research, Koto-Ku, Tokyo, 135-8550, Japan|Toranomon Hospital, Minato-Ku, Tokyo, 105-8470, Japan|National Hospital Organization Kyushu Cancer Center, Fukuoka, 811-1395, Japan|Social Medical Corporation Hakuaikai…	Study Protocol and Statistical Analysis Plan, https://cdn.clinicaltrials.gov/large-docs/28/NCT03366428/Prot_SAP_000.pdf
NCT00052000	MLN2704	PSMA	A Trial of MLN2704 in Subjects With Metastatic Androgen Independent Prostate Cancer	https://clinicaltrials.gov/study/NCT00052000		COMPLETED	This is the first study of MLN2704 administered to humans. The purpose of the study is to determine the highest dose of MLN2704 that can be given safely to patients with prostate cancer, and to identify any side effects associated with taking the drug. This study will also evaluate how MLN2704 is taken up (absorbed), broken down (metabolized) and eliminated (excreted) by the body. This process is…	NO	Prostate Cancer	DRUG: MLN2704 (DM1 conjugated monoclonal antibody MLN591)				Millennium Pharmaceuticals, Inc.		MALE	CHILD, ADULT, OLDER_ADULT	PHASE1	29	INDUSTRY	INTERVENTIONAL	Allocation: NON_RANDOMIZED|Intervention Model: PARALLEL|Masking: NONE|Primary Purpose: TREATMENT	M59102-042	2024-11-02			2003-01-22		2007-03-01	The Sidney Kimmel Comprehensive Cancer Center @ Johns Hopkins, Baltimore, Maryland, 21231, United States|Memorial Sloan-Kettering Cancer Center, New York, New York, 10021, United States
NCT06439693	a series of medications	ERBB2	The SAPPHO Study: A Single-Arm, Phase II Study of Sequential Therapy With Curative Intent in de Novo HER2+ Metastatic Breast Cancer	https://clinicaltrials.gov/study/NCT06439693		NOT_YET_RECRUITING	The purpose of this study is to test the safety and effectiveness of a sequence of drugs (a Taxane plus Trastuzumab plus Pertuzumab followed by Trastuzumab Deruxtecan, followed by Tucatinib plus Ado-Trastuzumab Emtansine (T-DM1), followed by Trastuzumab plus Pertuzumab plus Tucatinib) in HER2+ Breast Cancer. The study will help investigators understand whether first intensifying therapy for a spe…	NO	Breast Cancer Female|Breast Cancer|Breast Cancer Metastatic|Estrogen Receptor-positive Breast Cancer|HER2-positive Breast Cancer|Stage IV Breast Cancer	DRUG: Nab-Paclitaxel|DRUG: Paclitaxel|DRUG: Docetaxel|DRUG: Phesgo|DRUG: T-DM1|DRUG: Pertuzumab|DRUG: Trastuzumab Deruxtecan|DRUG: Trastuzumab Subcutaneous Subcutaneous|DRUG: Tucatinib|DRUG: Trastuzumab	Disease Free Survival at 4 Years (DFS4), DFS4 is the probability estimate 4 years based on Kaplan-Meier Method. DFS is defined the time from registration to disease progression (including death from any cause) or resumption of anti-cancer therapy (not including endocrine therapy). Participants that are alive, progression free and off all anti-cancer therapy are censored at the date of their last …	Median Overall Survival (OS), Overall survival based on the Kaplan-Meier method is defined as the time from randomization to death. Participants alive are censored at the last date of contact (including lost-to-follow-up) or at the date of withdrawal of consent, if relevant., Up to 5 years|Objective Response Rate (ORR), Objective response rate (ORR), defined as best overall response of either com…		Dana-Farber Cancer Institute	Translational Breast Cancer Research Consortium|Johns Hopkins University	ALL	ADULT, OLDER_ADULT	PHASE2	72	OTHER	INTERVENTIONAL	Allocation: NA|Intervention Model: SINGLE_GROUP|Masking: NONE|Primary Purpose: TREATMENT	24-223|TBCRC065	2024-11-24	2030-03-30	2033-03-30	2024-06-03		2024-06-03	Dana-Farber Cancer Institute, Boston, Massachusetts, 02215, United States
NCT03729596	vobramitamab duocarmazine	CD276	MGC018 With or Without MGA012 in Advanced Solid Tumors	https://clinicaltrials.gov/study/NCT03729596		TERMINATED	The purpose of this study is to evaluate the safety and tolerability, pharmacokinetics (PK) pharmacodynamics and preliminary antitumor activity of vobramitamab duocarmazine (MGC018) in patients with advanced solid tumors. Patients with solid tumors will be enrolled in the Dose Escalation Phase; Cohort Expansion will include metastatic castrate-resistant prostate cancer (mCRPC), non-small cell lun…	NO	Squamous Cell Carcinoma of Head and Neck|Triple Negative Breast Cancer|Melanoma|Advanced Solid Tumor, Adult|Metastatic Castrate Resistant Prostate Cancer|Non Small Cell Lung Cancer	BIOLOGICAL: vobramitamab duocarmazine	Number of patients with Adverse Events of vobramitamab duocarmazine as assessed by CTCAE v4.03, Safety is based on evaluation of adverse events (AEs) and serious adverse events (SAEs) from the time of study drug administration through the End of Study visit., Throughout the study up to 24 months|Number of patients with dose limiting toxicities (DLT), Maximum tolerated or maximum administered dose…	Best overall response (BOR) of vobramitamab duocarmazine, The best response recorded from the start of the study treatment until the end of treatment with vobramitamab duocarmazine, taking into account any requirement for confirmation of response., Throughout the study for up to 24 months|Objective response rate (ORR) of vobramitamab duocarmazine, The percentage of participants who achieve a comp…		MacroGenics		ALL	ADULT, OLDER_ADULT	PHASE1|PHASE2	143	INDUSTRY	INTERVENTIONAL	Allocation: NON_RANDOMIZED|Intervention Model: SEQUENTIAL|Masking: NONE|Primary Purpose: TREATMENT	CP-MGC018-01	2018-11-21	2023-03-18	2023-03-18	2018-11-02		2024-04-23	UCLA Department of Medicine - Hematology/Oncology, Santa Monica, California, 90404, United States|Sibley Memorial Hospital, Washington, District of Columbia, 20016, United States|The Johns Hopkins Kimmel Cancer Center, Baltimore, Maryland, 21231, United States|START Midwest, Grand Rapids, Michigan, 49546, United States|Nebraska Methodist Hospital, Omaha, Nebraska, 68114, United States|Comprehensi…
NCT03403725	MEN1309	CD205	MEN1309 I.v. Infusion in Pts With CD205-positive Metastatic Solid Tumors and Relapsed or Refractory NHL Ph I Study	https://clinicaltrials.gov/study/NCT03403725	CD205SHUTTLE	TERMINATED	The purpose of this clinical trial is to identify the highest dose of MEN1309 drug with acceptable safety profile and that can be used in patients affected by CD205-positive solid tumors and Non-Hodgkin Lymphoma	YES	Metastatic Solid Tumors|Relapsed/Refractory Non-Hodgkin Lymphoma	DRUG: MEN1309	Maximum-Tolerated Dose (MTD), Defined as the highest dose level at which no more than 1 of 6 patients experiences a DLT during the DLT assessment window., 21-day period after the first dose|Dose-Limiting Toxicity (DLT), Adverse drug reactions (ADRs) that will be assessed during Cycle 1: * any grade ≥ 3 cardiac toxicity, new segmental wall-motion abnormalities, or cardiac troponin I or T elevation…	Overall Survival, Timeframe between the first study drug administration and death from any cause., Through study completion, from "August 28, 2017" to "January 8, 2020" (2 years and 4 months)|Progression Free Survival, The Number of days between the first study administration to the date of first documented disease progression., Through study completion, from "August 28, 2017" to "January 8, 2020…	Correlation of CD205 Expression in Tumors With Clinical Activity of MEN1309 Assessed According to RECIST 1.1 or Cheson Criteria (2014), Exploratory Endpoint: Correlation of CD205 expression in tumors with clinical activity of MEN1309 assessed according to RECIST 1.1 or Cheson Criteria (2014) in terms of Response Rate, Disease control rate, duration of response, overall survival, and progression f…	Menarini Group		ALL	ADULT, OLDER_ADULT	PHASE1	28	INDUSTRY	INTERVENTIONAL	Allocation: NA|Intervention Model: SEQUENTIAL|Masking: NONE|Primary Purpose: TREATMENT	MEN1309-01	2017-08-28	2019-10-22	2020-01-08	2018-01-19	2021-09-28	2021-09-28	CHU Sart Tilman, Liège, 4000, Belgium|Centro Riferimento Oncologico, Aviano, 33081, Italy|IRCCS Ospedale San Raffaele, Milano, 20132, Italy|Vall d'Hebron Barcelona Hospital, Barcelona, Spain|START Madrid. Fundacion Jimenez Diaz, Madrid, 28040, Spain|Centro Integral Oncologico Clara Campal, Madrid, 28050, Spain|NCCC Clinical Trials Pharmacy, Northern Centre for Cancer Care, Newcastle upon Tyne, NE…	Study Protocol, https://cdn.clinicaltrials.gov/large-docs/25/NCT03403725/Prot_000.pdf|Statistical Analysis Plan, https://cdn.clinicaltrials.gov/large-docs/25/NCT03403725/SAP_001.pdf
NCT03856541	SHR-A1403	MET	A Study of SHR-A1403 in Patients With Advanced Solid Tumor	https://clinicaltrials.gov/study/NCT03856541		COMPLETED	SHR-A1403 is a humanized IgG2, anti-C-Met monoclonal antibody conjugated to microtubule inhibitor (c-Met ADC).The aim of this study is to assess the safety and tolerability of SHR-A1403，to define the dose limited toxicity（DLT）and the maximum tolerated dose (MTD)，to evaluate the pharmacokinetics of SHR-A1403，to assess the antitumor activity of SHR-A1403 in patients with advanced solid tumors preli…	NO	Advanced Solid Tumor	DRUG: SHR-A1403	The assessment of Treatment-related Adverse Events of SHR-A1403 in subjects with advanced solid tumors, Assessment of the incidence and severity of treatment-related Advanse events will be collected and analysed in all subjects who received at least 1 dose of SHR-A1403 with the current version of the NCI CTCAE, up to 24 months|DLT, A DLT is considered at AE related to study drug unless there is a…	Time to peak (Tmax) of serum concentration, Pharmacokinetics profile of SHR-A1403:Time to peak (Tmax) of serum concentration, Up to 24 months|Maximum serum concentration (Cmax), Pharmacokinetics profile of SHR-A1403:Maximum serum concentration (Cmax), Up to 24 months|Half-life (T1/2), Pharmacokinetics profile of SHR-A1403:Half-life (T1/2), Up to 24 months|Clearance/ bioavailability (CL/F), Pharma…		Jiangsu HengRui Medicine Co., Ltd.		ALL	ADULT, OLDER_ADULT	PHASE1	9	INDUSTRY	INTERVENTIONAL	Allocation: NA|Intervention Model: SINGLE_GROUP|Masking: NONE|Primary Purpose: TREATMENT	SHR-A1403-I-101	2019-02-13	2019-12-30	2020-05-07	2019-02-27		2022-10-28	Shanghai Cancer Center, Fudan University, Shanghai, 200032, China
NCT02091999	Enfortumab vedotin	Nectin-4	A Study of Escalating Doses of ASG-22CE Given as Monotherapy in Subjects With Metastatic Urothelial Cancer and Other Malignant Solid Tumors That Express Nectin-4	https://clinicaltrials.gov/study/NCT02091999		COMPLETED	The purpose of this study is to evaluate the safety and pharmacokinetics of enfortumab vedotin as well as assess the immunogenicity and antitumor activity in subjects with metastatic urothelial cancer and other malignant solid tumors that express Nectin-4.	NO	Metastatic Urothelial Cancer and Other Malignant Solid Tumors	DRUG: enfortumab vedotin	Incidence of adverse events, up to 36 months|Pharmacokinetic parameter for total antibody (TAb), antibody drug conjugate (ADC), and Monomethyl Auristatin E (MMAE): Concentration at the end of infusion (CEOI), Days 1-4, 8, 15-18 of Cycle 1 and Days 1, 8, and 15 of Cycle 2 and Day 1 of subsequent cycles up to an average of 24 months|Pharmacokinetic parameter for total antibody (TAb), antibody drug …	Incidence of Anti-Drug Antibody (ADA), up to 24 months|Tumor response, Incidence of tumor response defined as either a complete response (CR) or partial response (PR) per Response Evaluation Criteria in Solid Tumors (RECIST) criteria (version 1.1) that is confirmed ≥ 28 days later, up to 24 months|Objective response rate, Defined as the percentage of subjects who experience a best response of eit…		Astellas Pharma Global Development, Inc.	Seagen Inc.	ALL	ADULT, OLDER_ADULT	PHASE1	213	INDUSTRY	INTERVENTIONAL	Allocation: NON_RANDOMIZED|Intervention Model: PARALLEL|Masking: NONE|Primary Purpose: TREATMENT	ASG-22CE-13-2	2014-05-14	2022-12-07	2022-12-07	2014-03-19		2024-01-23	Site US00012, Los Angeles, California, 90033, United States|Site US00019, Stanford, California, 94305, United States|Site US00017, Aurora, Colorado, 80045, United States|Site US00006, New Haven, Connecticut, 06520, United States|Site US00007, Miami, Florida, 33136, United States|Site US00008, Tampa, Florida, 33612, United States|Site US00004, Fairway, Kansas, 66205, United States|Site US00005, An…
NCT06162988	68Ga-NOTA-H006	5T4	PET Imaging of 68Ga-NOTA-H006 in Malignancy	https://clinicaltrials.gov/study/NCT06162988		NOT_YET_RECRUITING	5T4, also known as trophoblast glycoprotein, is an oncofoetal antigen expressing in fetal development and cancer but rarely in adult. The high expression of 5T4 in malignancy was found be associated with poor clinical outcomes in ovarian, gastric and colorectal cancers. Several antibody drug conjugates are currently under development for cancer therapy in preclinic and clinic stages. Previously, …	NO	Tumor, Solid	DRUG: 68Ga-NOTA-H006 is injected intravenously with a dose of 1.8 MBq[0.05MCi]/kg.	Establishment and optimization of imaging method for 68Ga-NOTA-H006 PET, Analyze the standardized uptake value (SUV) of 68Ga-NOTA-H006 on the lesions Compare the SUV with 5T4 expression in pathological specimens, 90mins from time of injection			YiHui Guan		ALL	ADULT, OLDER_ADULT	NA	15	OTHER	INTERVENTIONAL	Allocation: NA|Intervention Model: SINGLE_GROUP|Masking: NONE|Primary Purpose: DIAGNOSTIC	KY2023-777	2024-12-23	2024-12-24	2024-12-28	2023-12-08		2023-12-08	Huashan Hospital, Shanghai, 200040, China
NCT04189614	Cofetuzumab Pelidotin	PTK7	An Efficacy and Safety Study of Cofetuzumab Pelidotin in Participants With PTK7-Expressing, Recurrent Non-Small Cell Lung Cancer	https://clinicaltrials.gov/study/NCT04189614		ACTIVE_NOT_RECRUITING	This study is being done to determine the efficacy and safety of cofetuzumab pelidotin in the PTK7-expressing, recurrent non-small cell lung cancer (NSCLC) population.	NO	Cancer|Non-small Cell Lung Cancer (NSCLC)	DRUG: Cofetuzumab Pelidotin	Objective Response Rate (ORR), ORR assessed by Response Evaluation Criteria in Solid Tumors (RECIST) version 1.1 criteria and defined as the percentage of participants with confirmed complete response (CR) or confirmed partial response (PR)., Up to approximately 3 years	Duration of Response (DOR), DOR is defined as the time from the participant's initial response (CR or PR) to the first occurrence of radiographic progression or death from any cause., Up to approximately 3 years|Progression Free Survival (PFS), PFS is defined as the time from the participant's first dose of study drug until radiographic progression or death from any cause., Up to approximately 3 …		AbbVie	Pfizer	ALL	ADULT, OLDER_ADULT	PHASE1	65	INDUSTRY	INTERVENTIONAL	Allocation: NA|Intervention Model: SINGLE_GROUP|Masking: NONE|Primary Purpose: TREATMENT	M19-611|2019-003472-39	2020-02-13	2024-12-31	2024-12-31	2019-12-06		2024-06-18	University of Alabama at Birmingham - Main /ID# 213605, Birmingham, Alabama, 35233, United States|Highlands Oncology Group, PA /ID# 215383, Springdale, Arkansas, 72762, United States|Stanford University School of Med /ID# 213450, Stanford, California, 94305-2200, United States|Univ of Colorado Cancer Center /ID# 215295, Aurora, Colorado, 80045, United States|Sylvester Comprehensive Cancer Center …
NCT05692908	STI-6129	CD38	An Open-Label Study of the Safety of an Anti-CD38 Antibody Drug Conjugate (STI-6129) in Patients With AL Amyloidosis	https://clinicaltrials.gov/study/NCT05692908		WITHDRAWN	This is a Phase 1 open-label, dose escalation trial designed to identify the recommended phase 2 dose of STI-6129 by assessing the safety, preliminary efficacy, and immunogenicity in subjects with relapsed or refractory systemic AL Amyloidosis	NO	Light Chain (AL) Amyloidosis	BIOLOGICAL: STI-6129	Safety of STI-6129, Safety as assessed by incidence of adverse events (AEs), severe AEs (SAEs), DLTs, neurotoxicity and laboratory abnormalities using the Common Terminology Criteria for Adverse Events (CTCAE Version 5), Baseline through study completion at up to approximately 24 months	Overall hematological response rate according to the 2012 Consensus Round Table response criteria, Proportion of subjects with Complete Response (CR), Very Good Partial Response (VGPR), Partial Response (PR), No Response (NR) and Progressive Disease (PD), Baseline through study completion at up to approximately 24 months|Organ response rates (cardiac, renal, hepatic, peripheral nervous system) ac…		Sorrento Therapeutics, Inc.		ALL	ADULT, OLDER_ADULT	PHASE1	0	INDUSTRY	INTERVENTIONAL	Allocation: NA|Intervention Model: SEQUENTIAL|Masking: NONE|Primary Purpose: TREATMENT	38ADC-RRAL-102-SWE	2024-09-23	2024-09-24	2024-11-24	2023-01-20		2023-04-28
NCT06008379	7MW3711	CD276	A Study of 7MW3711 in Subjects With Advanced Solid Tumors	https://clinicaltrials.gov/study/NCT06008379		RECRUITING	7MW3711 is a antibody-drug conjugate(ADC) drected to a target wildly expressed on solid tumors. This is an open-label, multicenter, phase 1/2 study to evaluate the Safety, Tolerability, Pharmacokinetics, and Efficacy of 7MW3711 in subjects with advanced solid tumors.	NO	Advanced Solid Tumor	DRUG: 7MW3711 for injection|DRUG: 7MW3711 for injection	evaluation of the incidence of adverse events (AEs) (part 1), Incidence and seriousness of adverse events (AEs) and serious adverse events (SAEs) by CTCAE version 5.0., approximately up to 16 cycles, 21 days a cycle|Identification of the MTD and /or RP2D of 7MW3711(part 1), from Day1 to Day21 in cycle1 of part 1|Overall response rate (ORR) evaluated by investigators based on RECIST version 1.1 in…	evaluation of PK parameters of 7MW3711, Maximum observed concentration(Cmax), approximately up to 2 years|evaluation of PK parameters of 7MW3711, the time to Cmax(tmax), approximately up to 2 years|evaluation of PK parameters of 7MW3711, half-live(t1/2), approximately up to 2 years|evaluation of PK parameters of 7MW3711, Area under the concentration-time curve(AUC), approximately up to 2 years|ov…		Mabwell (Shanghai) Bioscience Co., Ltd.		ALL	ADULT, OLDER_ADULT	PHASE1|PHASE2	164	INDUSTRY	INTERVENTIONAL	Allocation: NON_RANDOMIZED|Intervention Model: SEQUENTIAL|Masking: NONE|Primary Purpose: TREATMENT	7MW3711-2023-CP102	2023-08-28	2025-08-30	2026-01-30	2023-08-23		2023-09-13	Henan Cancer Hospital, Zhengzhou, Henan, China|Hunan Cancer Hospital, Changsha, Hunan, China|Xuzhou Central Hospital, Xuzhou, Jiangsu, 221009, China|The Lung Cancer Center of Shanghai Chest Hospital, Shanghai, Shanghai, 2000043, China|Zhejiang Cancer Hospital, Hangzhou, Zhejiang, 310000, China
NCT02539719	SC-003	DPEP3	Study of SC-003 Alone and in Combination With ABBV-181 in Subjects With Platinum-Resistant/Refractory Ovarian Cancer	https://clinicaltrials.gov/study/NCT02539719		TERMINATED	This is a Phase 1a/1b study of SC-003 as a single agent and in combination with ABBV-181 in patients with platinum-resistant/refractory ovarian cancer. SC-003 is an antibody-drug conjugate (ADC) comprised of a monoclonal antibody linked to a potent chemotherapy. ABBV-181 is a humanized, recombinant, mAb that binds to cell surface expressed programmed cell death 1 (PD-1).	NO	Ovarian Cancer	DRUG: SC-003|DRUG: SC-003 in combination with ABBV-181	Adverse Events, 18 months (Phase 1a/1b)	Overall Response Rate, 18 months (Phase 1a/1b)|Pharmacokinetics of SC-003: AUC (area under the curve), Cycle 1 and 4: days 1 (pre-dose, post-dose: 30min, 6hr), 2, 4, 8, 15; Cycles 2, 3, and 5: day 1 (pre-dose, post-dose: 30min)|Pharmacokinetics of SC-003: Cmax (maximum concentration), Cycle 1 and 4: days 1 (pre-dose, post-dose: 30min, 6hr), 2, 4, 8, 15; Cycles 2, 3, and 5: day 1 (pre-dose, post-d…		Stemcentrx		FEMALE	ADULT, OLDER_ADULT	PHASE1	74	INDUSTRY	INTERVENTIONAL	Allocation: NON_RANDOMIZED|Intervention Model: SEQUENTIAL|Masking: NONE|Primary Purpose: TREATMENT	SCRX003-001	2024-08-15	2019-01-02	2019-01-02	2015-09-03		2019-01-04	Fayetteville, Arkansas, 72703, United States|Duarte, California, 91010, United States|Chicago, Illinois, 60637, United States|Evanston, Illinois, 60208, United States|Boston, Massachusetts, 02114, United States|Detroit, Michigan, 48201, United States|Detroit, Michigan, 48202, United States|Rochester, Minnesota, 55905, United States|Saint Louis, Missouri, 63130, United States|New York, New York, 1…
NCT04699630	Patritumab Deruxtecan	ERBB3	A Study of U3-1402 (Patritumab Deruxtecan) in Subjects With Metastatic Breast Cancer	https://clinicaltrials.gov/study/NCT04699630		RECRUITING	This study is to evaluate safety and efficacy of an antibody drug conjugate U3-1402 (patritumab deruxtecan) in patients with locally advanced or metastatic breast cancer (MBC).	NO	Metastatic Breast Cancer|Locally Advanced Breast Cancer	DRUG: U3-1402	Overall response rate (ORR) of single agent U3-1402 (patritumab deruxtecan) in participants with MBC, ORR is defined as the proportion of participants with confirmed complete response (CR) or partial response (PR) (i.e., confirmation at least 4 weeks apart) according to RECIST Version 1.1 criteria. Per RECIST V1.1: A CR is defined as disappearance of all target and non-target lesions. A PR is def…	Incidence of participants with adverse events to assess the safety and tolerability of U3-1402 (patritumab deruxtecan) in participants with MBC, Safety is determined by proportion of participants who experience adverse events and serious adverse events when given U3-1402., From day 1 until 40 days after end of treatment or up to 33 months|Median Duration of Response (DOR) in participants with MBC…		SCRI Development Innovations, LLC	Daiichi Sankyo	ALL	ADULT, OLDER_ADULT	PHASE2	121	OTHER	INTERVENTIONAL	Allocation: NON_RANDOMIZED|Intervention Model: SEQUENTIAL|Masking: NONE|Primary Purpose: TREATMENT	BRE 354	2021-05-03	2024-11-25	2024-11-25	2021-01-07		2024-01-24	University of Alabama at Birmingham, Birmingham, Alabama, 35249, United States|Highlands Oncology Group, Springdale, Arkansas, 72762, United States|City of Hope, Duarte, California, 91010, United States|Florida Cancer Specialists-South, Fort Myers, Florida, 33901, United States|Florida Cancer Specialists-North, Saint Petersburg, Florida, 33705, United States|Washington University School of Medici…
NCT05613088	MORAb-202	FOLR1	A Study of MORAb-202 Versus Investigator's Choice Chemotherapy in Female Participants With Platinum-resistant High-grade Serous (HGS) Ovarian, Primary Peritoneal, or Fallopian Tube Cancer	https://clinicaltrials.gov/study/NCT05613088		RECRUITING	The purpose of the study is to assess the safety, tolerability, and efficacy of farletuzumab ecteribulin (MORAb-202) and compare it to Investigator's choice (IC) chemotherapy in female participants with platinum-resistant HGS ovarian, primary peritoneal, or fallopian tube cancer.	NO	Neoplasms, Ovarian	DRUG: MORAb-202|DRUG: Paclitaxel|DRUG: Pegylated Liposomal Doxorubicin (PLD)|DRUG: Topotecan	Objective response rate (ORR) by Response Evaluation Criteria in Solid Tumors (RECIST) v1.1 per investigator assessment, Up to 2 years|Proportion of participants with treatment related adverse events (TRAEs) leading to study discontinuation, Up to 2 years	Number of participants with adverse events (AEs), Up to 2 years|Number of participants with serious adverse events (SAEs), Up to 2 years|Number of participants with AEs leading to discontinuation, Up to 2 years|Number of participants with TRAEs, Up to 2 years|Number of participants with TRSAEs, Up to 2 years|Number of participants with AEs of special interest (AESIs), Up to 2 years|Number of deat…		Bristol-Myers Squibb	Eisai Inc.	FEMALE	ADULT, OLDER_ADULT	PHASE2	90	INDUSTRY	INTERVENTIONAL	Allocation: RANDOMIZED|Intervention Model: PARALLEL|Masking: NONE|Primary Purpose: TREATMENT	CA116-001|2021-004807-42	2023-02-01	2024-06-05	2026-10-11	2022-11-14		2024-05-31	Local Institution - 0040, Orange, California, 92868, United States|UC Davis Comprehensive Cancer Center, Sacramento, California, 95817-1514, United States|UC Davis Comprehensive Cancer Center, Sacramento, California, 95817, United States|California Pacific Medical Center (CPMC) - Research Institute, San Francisco, California, 94109, United States|Local Institution - 0078, Whittier, California, 90…
NCT03023722	Anetumab ravtansine	Mesothelin	Phase II Anetumab Ravtansine in Pre-treated Mesothelin-expressing Pancreatic Cancer	https://clinicaltrials.gov/study/NCT03023722		COMPLETED	The primary objective of this study is to: -Test the activity/response rate per RECIST 1.1 criteria of anetumab ravtansine in patients with advanced pancreatic cancer who stain for mesothelin expression The secondary objectives of this study are to: * Time to Progression (TTP) defined as time from study treatment to RECIST 1.1 progression, or death (others going off study will be censored) * Toxi…	YES	Pancreatic Cancer	DRUG: anetumab ravtansine	Response Rate as Measured Per RECIST 1.1 Criteria, Primary efficacy will be assessed based on radiological tumor evaluation by contrast-enhanced computed tomography (CT) or contrast-enhanced magnetic resonance imaging (MRI) of chest/abdomen/pelvis. Contrast enhanced RECIST 1.1 scan will be done at Prescreening. Said pre-screen scan will be the baseline measure. RECIST 1.1 Scans will be done every…	Time to Progression, Time to Progression (TTP) defined as time from study treatment to RECIST progression, or death (others going off study will be censored)., From start of treatment until disease progression or death (up to 3 years).|Drug Toxicity, Toxicity of Anetumab ravtansine assessed with National Cancer Institute's Common Terminology Criteria for Adverse Events (NCI-CTCAE) version 4.03. S…		Yale University	Bayer	ALL	ADULT, OLDER_ADULT	PHASE2	18	OTHER	INTERVENTIONAL	Allocation: NA|Intervention Model: SINGLE_GROUP|Masking: NONE|Primary Purpose: TREATMENT	1608018265	2017-05-11	2019-08-06	2019-12-11	2017-01-18	2021-01-22	2021-10-28	Yale Cancer Center, New Haven, Connecticut, 06510, United States|Rutgers Cancer Institute of New Jersey, New Brunswick, New Jersey, 08901-2163, United States|Vanderbilt-Ingram Cancer Center, Nashville, Tennessee, 37232, United States	Study Protocol and Statistical Analysis Plan, https://cdn.clinicaltrials.gov/large-docs/22/NCT03023722/Prot_SAP_000.pdf
NCT06426680	ILB-3101	CD276	A Study of the ILB-3101 in Patients With Advanced Solid Tumors	https://clinicaltrials.gov/study/NCT06426680		NOT_YET_RECRUITING	ILB-3101 is a fully humanized IgG1 antibody-drug conjugate (ADC) which specifically binds to B7-H3, a target wildly expressed on solid tumor cells. The objectives of this study are to investigate the safety, tolerability, pharmacokinetics and anti-tumor activity of ILB-3101 in Chinese advanced solid tumor patients.	NO	Advanced Solid Tumor	BIOLOGICAL: ILB-3101	DLT, Dose-limiting toxicity for ILB-3101, Up to day 21 from the first dose|MTD, Maximum tolerated dose (MTD) for ILB-3101, Up to day 21 from the first dose	ORR, Objective response rate (ORR) determined by investigators according to Response Evaluation Criteria in Solid Tumors (RECIST) 1., From the first dose up to PD or withdrawal from study, whichever came first, assessed up to 24 months|Incidence and severity of adverse events (AEs), AE assessed by investigator exclusively related to subject's underlying disease or medical condition \[graded accor…		Innolake Biopharm		ALL	ADULT, OLDER_ADULT	PHASE1	240	INDUSTRY	INTERVENTIONAL	Allocation: NA|Intervention Model: SINGLE_GROUP|Masking: NONE|Primary Purpose: TREATMENT	CILB3101A101	2024-08-24	2024-12-25	2024-03-26	2024-05-23		2024-05-24
NCT06008366	7MW3711	CD276	A Phase 1/2 Study of 7MW3711 in Advanced Solid Tumors	https://clinicaltrials.gov/study/NCT06008366		RECRUITING	7MW3711 is an antibody-drug conjugate(ADC) directed to a target wildly expressed on solid tumors. This is an open-label, multicenter, phase 1/2 study to evaluate the Safety, Tolerability, Pharmacokinetics, and Efficacy of 7MW3711 in subjects with advanced solid tumors.	NO	Advanced Solid Tumor	DRUG: 7MW3711 for injection|DRUG: 7MW3711 for injection	evaluation of the incidence of adverse events (AEs) (part 1), Incidence and seriousness of adverse events (AEs) and serious adverse events (SAEs) by CTCAE version 5.0, approximately up to 16 cycles, 21 days a cycle|Identification of the MTD and /or RP2D of 7MW3711(part 1), MTD(maximum tolerated dose) and /or RP2D(recommended phase II dose)of 7MW3711(part 1), from Day1 to Day21 in cycle1 of part 1…	overall response rate (ORR) (part1), ORR:defined as the proportion of patients who achieved a best overall response of complete response (CR) or partial response (PR) based on RECIST version 1.1, approximately up to 1 year|evaluation of the incidence of adverse events (AEs) (part 2), Incidence and seriousness of adverse events (AEs) and serious adverse events (SAEs) by CTCAE version 5.0, approxim…		Mabwell (Shanghai) Bioscience Co., Ltd.		ALL	ADULT, OLDER_ADULT	PHASE1|PHASE2	281	INDUSTRY	INTERVENTIONAL	Allocation: NON_RANDOMIZED|Intervention Model: SEQUENTIAL|Masking: NONE|Primary Purpose: TREATMENT	7MW3711-2023-CP101	2023-09-05	2025-08-30	2026-02-01	2023-08-23		2023-09-13	Ethics Committee of Fudan University Shanghai Cancer Center, Shanghai, 上海市, 200032, China
NCT04036461	CC-99712	BCMA	A Study of CC-99712, a BCMA Antibody-Drug Conjugate, in Participants With Relapsed and Refractory Multiple Myeloma	https://clinicaltrials.gov/study/NCT04036461		ACTIVE_NOT_RECRUITING	Study CC-99712-MM-001 is an open-label, Phase 1, dose escalation (Part A) and expansion (Part B), First-in-Human (FIH) clinical study of CC-99712 in monotherapy or combination with BMS-986405 in participants with relapsed and refractory multiple myeloma (MM). The dose escalation part (Part A) of the study will evaluate the safety and tolerability of escalating doses of CC-99712, administered intr…	NO	Multiple Myeloma	DRUG: CC-99712|DRUG: BMS-986405	Adverse Events (AEs), Number of participants with adverse event, From enrollment until at least 42 days after completion of study treatment|Maximum Tolerated Dose (MTD) in participants with relapsed and refractory MM, Is defined as the highest dose that causes DLTs in no more than 33% of patient population during the first cycle of treatment., Up to 28 days|Dose Limiting Toxicity (DLT) in partici…	Overall Response Rate (ORR), Is defined as the proportion of participants who achieve a partial response or better (eg, Partial response (PR), Very good partial response (VGPR), Complete response (CR) or sCR), according to IMWG response criteria., Up to 3 years|Time to Response, Is defined as the time from the first CC-99712 dose date to the date of first documented response (PR or better)., Up t…		Celgene		ALL	ADULT, OLDER_ADULT	PHASE1	160	INDUSTRY	INTERVENTIONAL	Allocation: NON_RANDOMIZED|Intervention Model: PARALLEL|Masking: NONE|Primary Purpose: TREATMENT	CC-99712-MM-001|U1111-1231-9404|2020-004514-35	2019-08-26	2024-08-23	2024-08-23	2019-07-29		2024-01-30	Local Institution - 107, La Jolla, California, 92093, United States|Local Institution - 105, Sarasota, Florida, 34232, United States|Local Institution - 103, Buffalo, New York, 14263, United States|Local Institution - 106, New York, New York, 10029, United States|Local Institution - 101, Portland, Oregon, 97239, United States|Local Institution - 104, Dallas, Texas, 75390, United States|Local Inst…
NCT06112041	ADC Combined With Radiotherapy, PD-L1 Sequential GM-CSF and Thymopentin？	PD-L1	The Prospective Clinical Study of Precision PRaG Therapy in Elderly Patients With Advanced Solid Malignant Tumors (PRaG9.0)	https://clinicaltrials.gov/study/NCT06112041		NOT_YET_RECRUITING	This is an open-label, single-arm, Phase II investigator-initiated trial of hypofractionated radiotherapy combined with PD-L1 inhibitor sequential GM-CSF and thymopentin for treatment of elderly patients with advanced solid tumors, when the HER-2 positive patients are treated with extra antibody-drug conjugate.	NO	Carcinoma|Solid Tumor	DRUG: ADC Combined With Radiotherapy, PD-L1 Sequential GM-CSF and Thymopentin	Objective Response Rate #ORR#, Objective Response Rate was defined as the percentage of participants with a complete response (CR) or partial response (PR)., 36 months	Progression-free Survival (PFS), PFS was defined as the time from the first administration of study treatment to the first occurrence of disease progression as determined by investigator using RECIST v1.1 or death from any cause, whichever comes first., 36 months|Disease control rate (DCR), DCR was defined as the percentage of participants with a complete response (CR), partial response (PR), or …		Second Affiliated Hospital of Soochow University		ALL	OLDER_ADULT	PHASE2	29	OTHER	INTERVENTIONAL	Allocation: NA|Intervention Model: SINGLE_GROUP|Masking: NONE|Primary Purpose: TREATMENT	JD-LK2023082-I01	2023-10-25	2026-10-30	2026-10-30	2023-11-01		2023-11-01	Second Affiliated Hospital of Soochow University, Suzhou, China
NCT06115902	TQB2102	HER2 ECD2; HER2 ECD4	A Study of TQB2102 for Injection in Patients With Recurrent/Metastatic Breast Cancer	https://clinicaltrials.gov/study/NCT06115902		RECRUITING	TQB2102 is an antibody-drug conjugate comprised of a humanised antibody against Human Epidermal Growth Factor Receptor 2 (HER2), an enzyme-cleavable linker, and a topoisomerase I inhibitor payload, which combine the ability of antibodies to specifically target tumour cells with the highly potent killing activity of drugs with payloads too toxic for systemic administration. This is a Phase 1/Phase…	NO	Breast Cancer	DRUG: TQB2102 for injection	Overall Response Rate (ORR), ORR defined as percentage of participants achieving complete response (CR) and partial response (PR)., Baseline up to 10 months.	Progression-Free Survival (PFS), PFS defined as the time from the first injection until the first documented progressive disease (PD) or death from any cause, whichever happens first., Baseline up to 14 months.|Duration of Remission (DOR), DOR defined as the time when the participants first achieved complete or partial remission to disease progression., Baseline up to 14 months.|Disease Control R…		Chia Tai Tianqing Pharmaceutical Group Nanjing Shunxin Pharmaceutical Co., Ltd.		ALL	ADULT, OLDER_ADULT	PHASE1	150	INDUSTRY	INTERVENTIONAL	Allocation: NA|Intervention Model: SINGLE_GROUP|Masking: NONE|Primary Purpose: TREATMENT	TQB2102-Ib-01	2023-11-17	2024-12-25	2024-12-26	2023-11-03		2023-11-29	Anhui Pronvincial Cancer Hospital, Hefei, Anhui, 230000, China|Lu'an People's Hospital, Lu'an, Anhui, 237008, China|Cancer Hospital Chinese Academy of Medical Science, Beijing, Beijing, 100021, China|Chongqing University Cancer Hospital, Chongqing, Chongqing, 400030, China|Sun Yat-Sen University Cancer Center, Guangzhou, Guangdong, 510060, China|Jiangmen Central Hospital, Jiangmen, Guangdong, 529…
NCT06390995	Mirvetuximab Soravtansine	FOLR1	A Study of TAK-853 in Adult Participants With Folate Receptor Alpha-Positive Advanced Ovarian Cancer And Other Solid Tumors	https://clinicaltrials.gov/study/NCT06390995		RECRUITING	The main aim of this study are to check for side effects from TAK-853, check how much TAK-853 participants can receive without getting side effects from it, check how well TAK-853 controls symptoms, and to check how much TAK-853 stays in their blood over time. The study will be conducted in two phases including Phase 1 Part and Phase 2 Part. In Phase 1 Part, the participants will stay in the hosp…	NO	Ovarian Cancer|Solid Tumors	DRUG: TAK-853	Phase 1 Part: Number of Participants with Dose-Limiting Toxicities (DLTs) in Cycle 1, Toxicity will be evaluated according to the National Cancer Institute Common Terminology Criteria for Adverse Events (NCI CTCAE), Version 5.0. DLT will be defined as any of the events specified in the protocol that are considered by the investigator to be at least possibly related to therapy with study medicatio…	Phase 1 Part: Cmax: Maximum Observed Plasma Concentration, Cmax in Phase 1 Part for intact antibody drug conjugate (ADC), Total Antibody (Ab), DM4 and S-methyl DM4 will be reported., 1 year|Phase 1 Part: AUC: Area Under the Plasma Concentration-Time Curve, AUC in Phase 1 Part for intact antibody drug conjugate (ADC), Total Antibody (Ab), DM4 and S-methyl DM4 will be reported., 1 year|Phase 1 Part…		Takeda		ALL	ADULT, OLDER_ADULT	PHASE1|PHASE2	25	INDUSTRY	INTERVENTIONAL	Allocation: NA|Intervention Model: SINGLE_GROUP|Masking: NONE|Primary Purpose: TREATMENT	TAK-853-1501|jRCT2031240057	2024-05-20	2025-09-30	2026-09-30	2024-04-30		2024-07-08	Aichi Cancer Center, Nagoya, Aichi, Japan|Jikei University Kashiwa Hospital, Kashiwa, Chiba, Japan|National Cancer Center Hospital East, Kashiwa, Chiba, Japan|Shikoku Cancer Center, Matsuyama, Ehime, Japan|Kurume University Hospital, Kurume, Fukuoka, Japan|Hokkaido University Hospital, Sapporo, Hokkaido, Japan|Sapporo Medical University Hospital, Sapporo, Hokkaido, Japan|Hyogo Cancer Center, Akas…
NCT02988817	Enapotamab vedotin	AXL	Enapotamab Vedotin (HuMax-AXL-ADC) Safety Study in Patients With Solid Tumors	https://clinicaltrials.gov/study/NCT02988817		COMPLETED	The purpose of the trial is to determine the maximum tolerated dose and to establish the safety profile of HuMax-AXL-ADC in a mixed population of patients with specified solid tumors	YES	Ovarian Cancer|Cervical Cancer|Endometrial Cancer|Non Small Cell Lung Cancer (NSCLC)|Thyroid Cancer|Melanoma|Sarcoma|Solid Tumors	BIOLOGICAL: Enapotamab vedotin (HuMax-AXL-ADC)	Number of Participants With Dose-limiting Toxicities (DLTs) for Dose-escalation Part, The DLTs were defined as Grade (G) 4 neutropenia or G4 thrombocytopenia for a minimal duration of 7 days, G3 and G4 febrile neutropenia, \>=G3 hemorrhage associated with \>=G3 thrombocytopenia, G4 anemia; Stevens Johnson syndrome, toxic epidermal necrolysis, \>=G3 cutaneous vasculitis; G3 neuropathy (not improve…	Area Under the Plasma Concentration-time Curve From Time 0 to Infinity (AUC0-inf) of Conjugated Enapotamab Vedotin for 1Q3W Dose-escalation Part, The AUC0-inf of conjugated enapotamab vedotin for 1Q3W dose-escalation part is reported. Sample scheduling of the 3Q4W dosing regimen did not allow calculation of the specific outcome measure., Predose, end of infusion (EOI), and 2 and 5 hours after EOI…		Genmab		ALL	ADULT, OLDER_ADULT	PHASE1|PHASE2	306	INDUSTRY	INTERVENTIONAL	Allocation: NA|Intervention Model: SEQUENTIAL|Masking: NONE|Primary Purpose: TREATMENT	GCT1021-01|2016-002243-42|211258	2016-11-23	2021-11-12	2021-11-12	2016-12-09	2023-01-05	2023-08-01	Mayo Clinic - Phoenix, Phoenix, Arizona, 85054, United States|University of Colorado Hospital, Aurora, Colorado, 80045, United States|Yale University, Smilow Cancer Center at Yale New Haven Hospital, New Haven, Connecticut, 06520, United States|Mayo Clinic Jacksonville, Jacksonville, Florida, 32224, United States|Moffitt Cancer Center, Tampa, Florida, 33612, United States|Emory University School …	Study Protocol, https://cdn.clinicaltrials.gov/large-docs/17/NCT02988817/Prot_000.pdf|Statistical Analysis Plan, https://cdn.clinicaltrials.gov/large-docs/17/NCT02988817/SAP_001.pdf
NCT06429761	Trastuzumab deruxtecan	ERBB2	A PROSPECTIVE, MULTI-CENTER, PHASE 4 STUDY TO ASSESS THE SAFETY OF TRASTUZUMAB DERUXTECAN, AN ANTI-HER2-ANTIBODY DRUG CONJUGATE IN INDIAN PATIENTS WITH UNRESECTABLE OR METASTATIC HER2-POSITIVE BREAST CANCER WHO HAVE RECEIVED A PRIOR ANTI-HER2-BASED REGIMEN	https://clinicaltrials.gov/study/NCT06429761	STRIDE	NOT_YET_RECRUITING	A PROSPECTIVE, MULTI-CENTER, PHASE 4, SINGLE ARM STUDY TO ASSESS THE SAFETY OF TRASTUZUMAB DERUXTECAN, AN ANTI-HER2-ANTIBODY DRUG CONJUGATE IN INDIAN PATIENTS WITH UNRESECTABLE OR METASTATIC HER2-POSITIVE BREAST CANCER WHO HAVE RECEIVED A PRIOR ANTI-HER2-BASED REGIMEN	NO	BREAST CANCER	DRUG: Trastuzumab deruxtecan	To assess the safety of trastuzumab deruxtecan in adult Indian patients, Rate of adverse events, 6 Months			AstraZeneca		ALL	ADULT, OLDER_ADULT	PHASE4	100	INDUSTRY	INTERVENTIONAL	Allocation: NA|Intervention Model: SINGLE_GROUP|Masking: NONE|Primary Purpose: TREATMENT	D9673L00012	2024-09-30	2026-04-30	2026-04-30	2024-05-28		2024-05-28
NCT00674947	BIIB015	TDGF1	A Phase I Study of BIIB015 in Relapsed/Refractory Solid Tumors	https://clinicaltrials.gov/study/NCT00674947		COMPLETED	Phase 1, open-labeled, safety and tolerability study for the treatment of subjects with relapsed or refractory solid tumors.	NO	Solid Tumors	DRUG: BIIB015	To evaluate safety, ongoing|To determine the maximum-tolerated dose (MTD), ongoing	To evaluate pharmacokinetics (PK), ongoing|To evaluate clinical activity, ongoing		Biogen		ALL	ADULT, OLDER_ADULT	PHASE1	55	INDUSTRY	INTERVENTIONAL	Allocation: NON_RANDOMIZED|Intervention Model: SINGLE_GROUP|Masking: NONE|Primary Purpose: TREATMENT	207ST101	2024-06-08	2024-06-11	2024-06-11	2008-05-08		2013-09-16	Research Site, Santa Monica, California, United States|Research Site, Philadelphia, Pennsylvania, United States|Research Site, San Antonio, Texas, United States
NCT06440005	AGX101	TM4SF1	A Study to Evaluate Safety, Tolerability and Preliminary Activity of AGX101 in Participants With Advanced Solid Tumors	https://clinicaltrials.gov/study/NCT06440005		RECRUITING	AGX101 is an antibody-drug conjugate (ADC) therapy for tumor-forming cancers. The purpose of this study is to learn about AGX101 effects and safety at various dose levels in an all-comers advanced solid cancer patient population. AGX101will be administered intravenously. Dosing of AGX101 will be repeated once every 3 weeks. Participants may continue study treatment until disease progression, unac…	NO	Cancer|Advanced Cancer|Locally Advanced Carcinoma|Metastatic Solid Tumor|Triple Negative Breast Cancer|Pancreas Cancer|Pancreatic Adenocarcinoma	DRUG: AGX101	Acceptable maximum tolerated dose for participants, Maximum tolerated dose (MTD) and the dose-limiting toxicities (DLTs) of AGX101 will be characterized, 21 days following the first dose of AGX101 (Day 1 through Day 21)|Number of participants with adverse events, Evaluation of the incidence, severity, and duration of adverse events, Screening through end of treatment, approximately 6 months and u…	Terminal elimination half life (PK), Determination of the terminal elimination half-life (t?), 22 days following the first dose of AGX101 (Day 1 through Day 22)|AUC (PK), Determination of the AUC in 1 dosing interval, 22 days following the first dose of AGX101 (Day 1 through Day 22)|Cmax (PK), Determination of the Cmax concentration over a dosing interval, systemic clearance, volume of distributi…		Angiex, Inc.		ALL	ADULT, OLDER_ADULT	PHASE1	80	INDUSTRY	INTERVENTIONAL	Allocation: NON_RANDOMIZED|Intervention Model: SEQUENTIAL|Masking: NONE|Primary Purpose: TREATMENT	AGX101-001	2024-05-24	2024-05-25	2024-05-27	2024-06-03		2024-06-03	Sarah Cannon Research Center, Nashville, Tennessee, 37203, United States|NEXT Oncology, San Antonio, Texas, 78229, United States
NCT05735496	TQB2102	HER2 ECD2; HER2 ECD4	Clinical Trial of the TQB2102 Injection in Patients With Advanced Cancers	https://clinicaltrials.gov/study/NCT05735496		NOT_YET_RECRUITING	TQB2102 is an antibody-drug conjugate comprised of a humanised antibody against Human Epidermal Growth Factor Receptor 2 (HER2), a enzyme-cleavable linker, and a topoisomerase I inhibitor payload, which combine the ability of antibodies to specifically target tumour cells with the highly potent killing activity of drugs with payloads too toxic for systemic administration. This is a phase I study …	NO	Advanced Cancer	DRUG: TQB2102 injection	Dose Limiting Toxicity (DLT), DLT was defined as toxicities that meet pre-defined severity criteria (according to the National Cancer Institute Common Terminology Criteria for Adverse Events (NCI CTCAE v5.0) toxicity assessment criteria), and assessed as having a suspected relationship to study drug that occurred within the first cycle (21 days) of treatment., During the first treatment cycle (21…	Immunogenicity, Incidence of anti-drug antibody (ADA), Before infusion on Cycle1 Day1, Cycle2 Day1, Cycle 4 Day1, Cycle7 Day1, Cycle12 Day1 (each cycle is 21 days). 90 days after the end of the last infusion.|Area under the curve (AUC), The area under the curve (AUC) of serum or plasma concentration of ADC drug, total antibody, and small molecule toxin., Before infusion, 15 minutes after infusion…		Chia Tai Tianqing Pharmaceutical Group Nanjing Shunxin Pharmaceutical Co., Ltd.		ALL	ADULT, OLDER_ADULT	PHASE1	71	INDUSTRY	INTERVENTIONAL	Allocation: NA|Intervention Model: SINGLE_GROUP|Masking: NONE|Primary Purpose: TREATMENT	TQB2102-I-01	2024-02-23	2024-04-24	2024-10-24	2023-02-21		2023-02-27	Sun Yat-sen University Cancer Center, Guangzhou, Guangdong, 510060, China
NCT02552121	Tisotumab vedotin	TF	Tisotumab Vedotin (HuMax?-TF-ADC) Safety Study in Patients With Solid Tumors	https://clinicaltrials.gov/study/NCT02552121		COMPLETED	The purpose of the trial is to establish the tolerability of tisotumab vedotin (HuMax-TF-ADC) dosed three times every four weeks (3q4wk) in a mixed population of patients with specified solid tumors.	YES	Ovary Cancer|Cervix Cancer|Endometrium Cancer|Bladder Cancer|Prostate Cancer (CRPC)|Esophagus Cancer|Lung Cancer (NSCLC)	DRUG: Tisotumab vedotin (HuMax-TF-ADC)	Part 1: Number of Participants Who Experience at Least One Adverse Event (AE), An AE is defined as any untoward medical occurrence in a clinical investigation participant administered a drug; it does not necessarily have to have a causal relationship with this treatment. A treatment-emergent adverse event (TEAE) is defined as an adverse event with an onset that occurs after receiving study drug.,…	Part 1: Number of Participants With Markedly Abnormal Laboratory Values, The number of participants with any markedly abnormal standard safety laboratory values collected throughout study. Markedly abnormal laboratory values are defined as any grade \>=3 laboratory abnormality events., Baseline to end of follow-up; maximum time of follow-up was 24 weeks|Part 2: Number of Participants With Markedl…		Seagen Inc.	Genmab	ALL	ADULT, OLDER_ADULT	PHASE1|PHASE2	33	INDUSTRY	INTERVENTIONAL	Allocation: NA|Intervention Model: SEQUENTIAL|Masking: NONE|Primary Purpose: TREATMENT	GEN702|innovaTV 202	2015-11-30	2017-12-13	2017-12-13	2015-09-16	2019-03-12	2021-04-08	MD Anderson Cancer Center, Houston, Texas, 77030, United States|Institut Jules Bordet, Bruxelles, Brussels, 1000, Belgium|Universitaire Ziekenhuizen Leuven, Leuven, Flemish Brabant, 3000, Belgium|Grand H?pital de Charleroi, Charleroi, Hainaut, 6000, Belgium|CHU de Liège, Liege, Liège, 4000, Belgium|CHU UCL Namur - site Godinne, Yvoir, Namur, 5530, Belgium|Cliniques Universitaires Saint-Luc, Bruss…	Study Protocol, https://cdn.clinicaltrials.gov/large-docs/21/NCT02552121/Prot_000.pdf|Statistical Analysis Plan, https://cdn.clinicaltrials.gov/large-docs/21/NCT02552121/SAP_001.pdf
NCT04965766	Patritumab Deruxtecan	ERBB3	Patritumab Deruxtecan (U3-1402) in Unresectable Locally Advanced or Metastatic Breast Cancer	https://clinicaltrials.gov/study/NCT04965766	ICARUS-BREAST	RECRUITING	This study aims to evaluate the efficacy and safety of U3-1402 in participants with advanced breast cancer (ABC). Participants have to be hormone-receptor positive (HR+) and have to be resistant to endocrine therapy and cyclin-dependent kinases 4 and 6 (CDK4/6) inhibitors. Participants may have received multiple lines of endocrine therapy with or without targeted therapies and must have received …	NO	Metastatic Breast Cancer	DRUG: U3-1402	Evaluation of objective response rate (ORR), Defined as the proportion of participants who achieved a confirmed complete response (CR) or partial response (PR) assessed by investigators, During treatment period, an average of 8 months	Evaluation of duration of response (DoR) in the overall population and according to HER3 expression levels, Applicable to participants with either complete response (CR) or partial response (PR) and is defined as the time from the first documented CR or PR until the date of disease progression, or until the date of death. It will be evaluated in the overall population and in subgroups of patients…		Gustave Roussy, Cancer Campus, Grand Paris	Daiichi Sankyo	ALL	ADULT, OLDER_ADULT	PHASE2	170	OTHER	INTERVENTIONAL	Allocation: NA|Intervention Model: SINGLE_GROUP|Masking: NONE|Primary Purpose: TREATMENT	2020-005722-28|2020/3188	2021-05-11	2024-01-11	2026-06-11	2021-07-16		2023-05-18	Gustave Roussy, Villejuif, 94805, France
NCT02462525	Azintuxizumab Vedotin	SLAMF7	Dose-Escalation Study of ABBV-838, an Antibody Drug Conjugate, in Subjects With Relapsed and Refractory Multiple Myeloma	https://clinicaltrials.gov/study/NCT02462525		TERMINATED	This is a Phase 1/1b, open-label, dose-escalation study designed to evaluate the safety, pharmacokinetics, and to determine the recommended Phase 2 dose of ABBV-838 in subjects with relapsed and refractory multiple myeloma.	NO	Multiple Myeloma	DRUG: ABBV-838|DRUG: Pomalidomide|DRUG: Dexamethasone	Maximum plasma concentration (Cmax) of ABBV-838, The maximum plasma concentration (Cmax: measured in ng/ml) is the highest concentration that a drug achieves in the blood after the first dose, but before administration of a second dose., Cycle 1 Day 1 (C1D1) and C3D1 pre- and post-dose; C1D4, C1D8, C1D15, C2D1, C2D15, C3D4, C3D8, C3D15, C4D1, and all subsequent ABBV-838 pre-dose dosing cycles|Max…	Preliminary activity of ABBV-838 monotherapy, Response evaluation will be based on International Myeloma Working Group (IMWG) Response Criteria., At screening, Cycle 1 Day 15 (C1D15), C3D15, C4D1, and for subjects who have been on ABBV-838 for ≥ 6 cycles, radiologic tumor assessments may be performed every 3 cycles per Investigator discretion up to approximately 3 years		AbbVie		ALL	ADULT, OLDER_ADULT	PHASE1	74	INDUSTRY	INTERVENTIONAL	Allocation: NON_RANDOMIZED|Intervention Model: SINGLE_GROUP|Masking: NONE|Primary Purpose: TREATMENT	M14-467|2014-002609-39	2015-05-06	2017-12-06	2017-12-06	2015-06-04		2018-09-13	The University of Chicago Medical Center /ID# 139403, Chicago, Illinois, 60637, United States|University of Michigan Medical Center /ID# 139402, Ann Arbor, Michigan, 48109, United States|Washington University School of Medicine /ID# 135708, Saint Louis, Missouri, 63110-1093, United States|Mount Sinai Medical Center /ID# 133569, New York, New York, 10029, United States|The Sarah Cannon Research In…
NCT04278144	BDC-1001	ERBB2	A First-in-human Study Using BDC-1001 as a Single Agent and in Combination With Nivolumab in Advanced HER2-Expressing Solid Tumors	https://clinicaltrials.gov/study/NCT04278144		ACTIVE_NOT_RECRUITING	A first-in-human study using BDC-1001 as a single agent and in combination with nivolumab in HER2 expressing advanced malignancies	NO	HER2-positive Solid Tumors|HER2-positive Breast Cancer|HER2-positive Colorectal Cancer|HER2-positive Gastroesophageal Cancer|HER2-positive Endometrial Cancer	DRUG: BDC-1001|DRUG: Nivolumab	Incidence of adverse events (AEs) and serious adverse events (SAEs), Escalation period, 2 years|Incidence and nature of dose-limiting toxicities (DLTs), Escalation period, up to 21 days|Incidence of potential-immune related toxicities, Escalation period, 2 years|Maximum tolerable dose (MTD) or a tolerated dose below MTD, Escalation period, 2 years|Objective response rate (ORR) of confirmed comple…	PK (Cmax) of BDC-1001, Escalation and expansion periods, 2 years|PK (Cmin) of BDC-1001, Escalation and expansion periods, 2 years|PK (AUC0-t) of BDC-1001, Escalation period, 2 years|PK (AUC0-inf) of BDC-1001, Escalation period, 2 years|PK (CL) of BDC-1001, Escalation period, 2 years|PK (Vz) of BDC-1001, Escalation period, 2 years|PK (t1/2) of BDC-1001, Escalation period, 2 years|Objective respons…		Bolt Biotherapeutics, Inc.	Bristol-Myers Squibb	ALL	ADULT, OLDER_ADULT	PHASE1|PHASE2	390	INDUSTRY	INTERVENTIONAL	Allocation: NON_RANDOMIZED|Intervention Model: PARALLEL|Masking: NONE|Primary Purpose: TREATMENT	BBI-20201001	2020-02-24	2025-01-31	2026-10-31	2020-02-20		2024-05-30	Stanford University, Palo Alto, California, 94304, United States|Georgetown University Medical Center, Washington, District of Columbia, 20007, United States|The University of Chicago Medical Center, Chicago, Illinois, 60637, United States|Dana-Farber Cancer Institute, Boston, Massachusetts, 02215, United States|START Midwest, Grand Rapids, Michigan, 49546, United States|Memorial Sloan-Kettering …
NCT06100874	Sacituzumab Govitecan；Trastuzumab;Trastuzumab and Hyaluronidase-oysk (Herceptin Hylecta)	TROP2;ERBB2	A Single-arm Phase II Trial of SAcituzumab Govitecan and Trastuzumab for HER2+ Metastatic Breast Cancer After Trastuzumab dEruxtEcaN (SATEEN)	https://clinicaltrials.gov/study/NCT06100874		RECRUITING	This research study is being done to evaluate the safety and effectiveness of sacituzumab govitecan with trastuzumab (Herceptin, Herceptin Hylecta, or trastuzumab biosimilar) in metastatic HER2+ breast cancer. The names of the study drugs used in this research study are: * Sacituzumab govitecan (a type of antibody-drug conjugate) * Trastuzumab (Herceptin) (a type of monoclonal antibody) * Trastuz…	NO	Her 2 Positive Breast Cancer|Breast Cancer Female|Breast Cancer Metastatic	DRUG: Sacituzumab Govitecan|DRUG: Trastuzumab|DRUG: Trastuzumab and Hyaluronidase-oysk	Overall Response Rate (ORR), The overall response rate (ORR) was defined as the proportion of participants achieving complete response (CR) or partial response (PR) based on RECISTv1.1 criteria., 3 years	Median Progression-Free Survival (PFS), Progression-free survival based on the Kaplan-Meier method is defined as the duration between randomization and documented disease progression (PD) or death, or is censored at time of last disease assessment., 3 years|Median Overall Survival (OS), Overall Survival (OS) based on the Kaplan-Meier method is defined as the time from study entry to death or cens…		Adrienne G. Waks	Gilead Sciences	ALL	ADULT, OLDER_ADULT	PHASE2	40	OTHER	INTERVENTIONAL	Allocation: NA|Intervention Model: SINGLE_GROUP|Masking: NONE|Primary Purpose: TREATMENT	23-531	2023-11-20	2026-11-30	2027-11-30	2023-10-25		2024-05-30	Dana Farber Cancer Institite, Boston, Massachusetts, 02215, United States|DFCI @ South Shore Hospital, South Weymouth, Massachusetts, 02190, United States
NCT06332170	HS-20093	CD276	ARTEMIS-101: A Study of HS-20093 Combinations in Patients With Advanced Solid Tumors	https://clinicaltrials.gov/study/NCT06332170		NOT_YET_RECRUITING	HS-20093 is a fully humanized IgG1 antibody-drug conjugate (ADC) which specifically binds to B7-H3, a target wildly expressed on solid tumor cells. The objectives of this study are to investigate the safety, tolerability, pharmacokinetics and anti-tumor activity of HS-20093 in combination with other anti-cancer agents in patients with advanced solid tumor patients.	NO	Advanced Solid Tumor	DRUG: HS-20093|DRUG: Adebrelimab|DRUG: Cisplatin/ Carboplatin|DRUG: Cetuximab|DRUG: Enzalutamide	Maximum tolerated dose (MTD) for combination-treatments, To determine the MTD for further evaluation of HS-20093 with other anti-cancer agents in subjects with advanced solid tumors, Up to day 21 from the first dose	Incidence and severity of adverse events (AEs), AE assessed by investigator exclusively related to subject's underlying disease or medical condition \[graded according to the NCI Common Terminology Criteria for Adverse Events (CTCAE), Version 5.0\]. Any untoward medical occurrence in a clinical study participant, whether or not considered related to the medicinal product. Incidence and severity o…		Hansoh BioMedical R&D Company		ALL	ADULT, OLDER_ADULT	PHASE1	610	INDUSTRY	INTERVENTIONAL	Allocation: NON_RANDOMIZED|Intervention Model: SEQUENTIAL|Masking: NONE|Primary Purpose: TREATMENT	HS-20093-103	2024-05-30	2026-05-30	2028-05-30	2024-03-27		2024-03-27
NCT03368196	Trastuzumab deruxtecan	ERBB2	DS-8201a in Patients With Cancer That Tests Positive for Human Epidermal Growth Factor Receptor 2 (HER2) Protein	https://clinicaltrials.gov/study/NCT03368196		COMPLETED	HER2-positive cancer is a cancer that tests positive for a protein called human epidermal growth factor receptor 2 (HER2). HER2 promotes the growth of certain cancer cells. This study will test DS-8201a (trastuzumab deruxtecan), a HER2-targeted antibody and topoisomerase I inhibitor conjugate. The safety and tolerability profile of DS-8201a will be assessed in Chinese patients with certain types …	YES	Adenocarcinoma, Gastric|Neoplasm, Breast	DRUG: DS-8201a	Treatment-emergent Adverse Events Following Treatment With DS-8201a (Trastuzumab Deruxtecan), Adverse events (AEs) were to be coded using MedDRA Version 20.1 and assigned severity grades based on Common Terminology Criteria for Adverse Events (CTCAE) Version 4.03. A treatment-emergent adverse event (TEAE) was defined as an AE that occurred, having been absent before the first dose of study drug, …	Pharmacokinetic Parameter of Maximum (Peak) Observed Serum Concentration (Cmax) Following Cycle 1 and Cycle 3 Treatment With DS-8201a (Trastuzumab Deruxtecan), Maximum concentration (Cmax) of DS-8201a and total anti-HER2 antibody was assessed., Cycles 1 and 3, Day 1: before infusion (BI), end of infusion (EOI), 2 hours, 4 hours, 7 hours; Days 2 and 4, 24 hours, 72 hours; Days 8, and 15; Cycles 2,…		Daiichi Sankyo Taiwan Ltd., a Daiichi Sankyo Company	AstraZeneca	ALL	ADULT, OLDER_ADULT	PHASE1	12	INDUSTRY	INTERVENTIONAL	Allocation: NA|Intervention Model: SINGLE_GROUP|Masking: NONE|Primary Purpose: TREATMENT	DS8201-A-A103	2018-04-02	2018-09-14	2022-09-28	2017-12-11	2021-06-14	2022-11-03	National Taiwan University Hospital, Taipei, 100, Taiwan|Taipei Veterans General Hospital, Taipei, 112, Taiwan	Study Protocol and Statistical Analysis Plan, https://cdn.clinicaltrials.gov/large-docs/96/NCT03368196/Prot_SAP_001.pdf
NCT04826341	Sacituzumab Govitecan	TROP2	A Phase I/II Study of Sacituzumab Govitecan Plus Berzosertib in Small Cell Lung Cancer, Extra-Pulmonary Small Cell Neuroendocrine Cancer and Homologous Recombination-Deficient Cancers Resistant to PARP Inhibitors	https://clinicaltrials.gov/study/NCT04826341		SUSPENDED	Background: Small cell lung cancer and PARP inhibitor resistant tumors are aggressive cancers. Current treatments for people with these tumors yield little benefit. Researchers want to see if a combination of drugs can help. Objective: To find a safe combination of sacituzumab govitecan and berzosertib and to see if this will cause small cell lung cancer and PARP inhibitor resistant tumors to shr…	NO	HRD Cancer|SCLC|Advanced Solid Tumors	DRUG: Berzosertib|DRUG: Sacituzumab Govitecan	Phase II: ORR, In phase II, in each cohort, the fraction of participants who experience a PR or CR will be reported along with a 95% confidence interval., Disease progression|Phase I: MTD, In phase I, the toxicities identified at each dose level will be reported, by dose level, type, and grade., Phase I	Progression free survival (PFS), Progression free survival (PFS) will be calculated from on-study date until date of progression or death without progression, using the Kaplan-Meier method accompanied by determination of the median and its 95% confidence interval., Disease progression|Overall survival (OS), Overall survival (OS) will be calculated from the on-study date until date of death., Deat…		National Cancer Institute (NCI)		ALL	ADULT, OLDER_ADULT	PHASE1|PHASE2	13	NIH	INTERVENTIONAL	Allocation: NON_RANDOMIZED|Intervention Model: SEQUENTIAL|Masking: NONE|Primary Purpose: TREATMENT	10000144|000144-C	2021-09-20	2026-03-01	2027-03-01	2021-04-01		2024-07-12	National Institutes of Health Clinical Center, Bethesda, Maryland, 20892, United States
NCT03621982	Camidanlumab tesirine	CD25	Study of ADCT-301 in Patients With Selected Advanced Solid Tumors	https://clinicaltrials.gov/study/NCT03621982		TERMINATED	This study evaluates ADCT-301 in patients with Selected Advanced Solid Tumors. Patients will participate in a Treatment Period with 3-week cycles and a Follow-up Period every 12 weeks for up to 1 year after treatment discontinuation.	YES	Head and Neck Cancer Squamous Cell Carcinoma|Non-small Cell Lung Cancer|Gastric Cancer|Esophageal Cancer|Pancreas Cancer|Bladder Cancer|Renal Cell Carcinoma|Melanoma|Triple-negative Breast Cancer|Ovarian Cancer|Colo-rectal Cancer|Fallopian Tube Cancer	DRUG: ADCT-301|BIOLOGICAL: Pembrolizumab	Number of Participants Who Experienced Treatment-emergent Adverse Events (TEAEs), An adverse event (AE) is defined as any untoward medical occurrence in a participant or clinical investigation participant administered a pharmaceutical product, which does not necessarily have to have a causal relationship with this treatment. A TEAE is defined as an AE that occurs or worsens in the period extendin…	Overall Response Rate (ORR) According to the Response Evaluation Criteria In Solid Tumors (RECIST) v1.1., The ORR was defined as the percentage of participants with a best overall response (BOR) of complete response (CR) or partial response (PR). The overall response category was derived based on response assessment performed on or before the start of subsequent anti-cancer therapy., Up to 3 year…		ADC Therapeutics S.A.		ALL	ADULT, OLDER_ADULT	PHASE1	78	INDUSTRY	INTERVENTIONAL	Allocation: NON_RANDOMIZED|Intervention Model: SEQUENTIAL|Masking: NONE|Primary Purpose: TREATMENT	ADCT-301-103|2019-003132-23	2018-11-09	2022-12-14	2022-12-14	2018-08-09	2024-06-13	2024-06-13	Stanford Cancer Center, Palo Alto, California, 94304, United States|Smilow Cancer Hospital Phase 1 Unit, New Haven, Connecticut, 06511, United States|Oregon Health and Science University, Portland, Oregon, 97239, United States|The Sarah Cannon Research Institute, Nashville, Tennessee, 37203, United States|The START Center for Cancer Care, San Antonio, Texas, 78229, United States|Institut Jules Bo…	Study Protocol, https://cdn.clinicaltrials.gov/large-docs/82/NCT03621982/Prot_000.pdf|Statistical Analysis Plan, https://cdn.clinicaltrials.gov/large-docs/82/NCT03621982/SAP_001.pdf
NCT04740398	CBP-1008	FOLR1;TRPV6(双抗)	A Study of CBP-1008 in Patients With Advanced Solid Tumor	https://clinicaltrials.gov/study/NCT04740398		RECRUITING	The primary objective of this phase I study is to evaluate the safety and potential efficacy and to determine the recommended phase 2 dose (RP2D) of CBP-1008, a bi-specific ligand conjugated drugs in patients with advanced solid tumors.	NO	Advanced Solid Tumor	DRUG: CBP-1008	Incidence and severity of Adverse Events (AEs), Assessed by number of patients with AE, Treatment-Emergent Adverse Event (TEAE), serious adverse event (SAE), and discontinuation of study drug due to AE., up to 12 months|To determine the maximum tolerated dose (MTD), Dose limiting toxicity (DLT) will be assessed by NCI CTCAE v4.03. MTD is defined as the previous dose level at which 2 out of 3 part…	Maximum serum concentration (Cmax) of CBP-1008, Maximum serum concentration (Cmax) of CBP-1008 will be investigated., up to 12 months|Time to maximum serum concentration (Tmax) of CBP-1008, Tmax of CBP-1008 will be investigated., up to 12 months|Elimination half-life (T1/2) of CBP-1008, T1/2 of CBP-1008 will be investigated., up to 12 months|AUC0-t of CBP-1008, AUC0-t is defined as area under the…		Coherent Biopharma (Suzhou) Co., Ltd.		ALL	ADULT, OLDER_ADULT	PHASE1	143	INDUSTRY	INTERVENTIONAL	Allocation: NA|Intervention Model: SINGLE_GROUP|Masking: NONE|Primary Purpose: TREATMENT	CBP-1008-01	2019-03-06	2024-09-23	2024-03-24	2021-02-05		2023-03-29	Beijing Cancer Hospital, Beijing, Beijing, 100000, China|Cancer Hospital Chinese Academy of Medical Sciences, Beijing, Beijing, 100000, China|Fudan University Shanghai Cancer Center, Shanghai, Shanghai, 200000, China
NCT06106152	WTX212A	PD-L1	WTX212A Monotherapy and in Combination With PD -1/PD-L1 Monoclonal Antibody	https://clinicaltrials.gov/study/NCT06106152		RECRUITING	This trial is a single-center, open-label designed investigator-initiated clinical study (IIT) to evaluate the efficacy, safety, pharmacokinetics, and pharmacodynamics of WTX212A injection WTX212A injection combined with PD -1/PD-L1 monoclonal antibody in patients with advanced lung cancer	NO	Advanced Lung Cancer	DRUG: WTX212A injection|DRUG: PD -1/PD-L1 monoclonal antibody	To evaluate the efficacy of WTX212A injection combined with PD -1/PD-L1 monoclonal antibody in the treatment of patients with IO- resistant advanced lung cancer., Overall Response Rate (ORR) According to Response Evaluation Criteria In Solid Tumors Version 1.1, 1 year	the safety of WTX212A injection combined with PD -1/PD-L1 monoclonal antibody in the treatment of IO- resistant advanced lung cancer patients, The incidence of adverse events (AE), treatment related adverse events (TRAE), and severe adverse events (SAE) during the treatment of WTX212A injection, 1 year|To evaluate the pharmacokinetic ( PK ) characteristics of WTX212A injection combined with PD -1…	To evaluate the pharmacodynamics ( PD ) characteristics of WTX212A injection combined with PD -1/PD-L1 monoclonal antibody in patients with IO- resistant advanced lung cancer, The occupancy rate of PD-1 receptor on the surface of peripheral blood T cells in subjects after WTX212A infusion, 1 year|To explore and evaluate WTX212A injection combined with PD -1/PD-L1 monoclonal antibody in the treatm…	Second Affiliated Hospital, School of Medicine, Zhejiang University	Westlake Therapeutics	ALL	ADULT, OLDER_ADULT	EARLY_PHASE1	20	OTHER	INTERVENTIONAL	Allocation: NON_RANDOMIZED|Intervention Model: PARALLEL|Masking: NONE|Primary Purpose: TREATMENT	Reboot-105	2023-12-05	2024-10-30	2025-12-31	2023-10-30		2024-03-26	2nd Affiliated Hospital, School of Medicine, Zhejiang University, Hangzhou, Zhejiang, 310000, China
NCT04396340	XMT-1592	NaPi2b	First-in-Human Study of XMT-1592 in Patients With Ovarian Cancer and NSCLC Likely to Express NaPi2b	https://clinicaltrials.gov/study/NCT04396340		TERMINATED	Phase 1b, a study in high grade serous ovarian cancer and nonsmall cell lung cancer to evaluate the safety and clinical activity of the antibody-drug conjugate (ADC) XMT-1592.	NO	Ovarian Cancer|Nonsmall Cell Lung Cancer	BIOLOGICAL: XMT-1592	Maximum tolerated dose or recommended Phase 2 dose, Evaluate adverse events and use of concomitant medication use after XMT-1592 doses, Up to 36 weeks, from the date of first dose until unacceptable side effects or a dose-limiting toxicity is me	Time of maximum observed concentration of XMT-1592, Determine the pharmacokinetics of XMT-1592, Daily for one week after first dose; weekly until 21 days after first dose; immediately before and after and 1 week after all subsequent doses|Maximum concentration of XMT-1592, Determine the pharmacokinetics of XMT-1592, Daily for one week after first dose; weekly until 21 days after first dose; immed…		Mersana Therapeutics	IQVIA Biotech	ALL	ADULT, OLDER_ADULT	PHASE1	31	INDUSTRY	INTERVENTIONAL	Allocation: NON_RANDOMIZED|Intervention Model: SINGLE_GROUP|Masking: NONE|Primary Purpose: TREATMENT	XMT-1592-1	2020-05-11	2022-09-30	2022-09-30	2020-05-20		2024-03-15	Mary Crowley Cancer Research Center, Dallas, Texas, 75201, United States
NCT03474107	Enfortumab vedotin	Nectin-4	A Study to Evaluate Enfortumab Vedotin Versus (vs) Chemotherapy in Subjects With Previously Treated Locally Advanced or Metastatic Urothelial Cancer (EV-301)	https://clinicaltrials.gov/study/NCT03474107		ACTIVE_NOT_RECRUITING	The purpose of this study was to compare the overall survival (OS) of participants with locally advanced or metastatic urothelial cancer treated with enfortumab vedotin (EV) to the OS of participants treated with chemotherapy. This study compared progression-free survival on study therapy (PFS1); the overall response rate (ORR) and the disease control rate (DCR) per Response Evaluation Criteria i…	YES	Ureteral Cancer|Urothelial Cancer|Bladder Cancer	DRUG: Enfortumab Vedotin|DRUG: Docetaxel|DRUG: Vinflunine|DRUG: Paclitaxel	Overall Survival (OS), OS was defined as the time from the date of randomization until the documented date of death from any cause. OS was analyzed using Kaplan-Meier estimates. Participants who were still alive at the time of data cutoff date were to be censored at the last known alive date or at the data cutoff date, whichever was earlier., From randomization until the analysis cut-off date of …	Progression Free Survival on Study Therapy (PFS1) as Per Response Evaluation Criteria in Solid Tumors Version 1.1 (RECIST v1.1), PFS: time from date of randomization until date of documented radiological disease progression (PD) per investigator based on RECIST V1.1, or until death due to any cause, whichever occurred first. PD: \>= 20% increase in sum of diameters of target lesions taking as ref…		Astellas Pharma Global Development, Inc.	Seagen Inc.	ALL	ADULT, OLDER_ADULT	PHASE3	608	INDUSTRY	INTERVENTIONAL	Allocation: RANDOMIZED|Intervention Model: PARALLEL|Masking: NONE|Primary Purpose: TREATMENT	7465-CL-0301|2017-003344-21	2018-06-27	2020-07-15	2024-08-31	2018-03-22	2021-08-24	2024-06-28	UCI Chao Family Comprehensive Cancer Center, Orange, California, 92868, United States|University of California, Sacramento, California, 95817, United States|Innovative Clinical Research, Whittier, California, 90606, United States|University of Colorado, Denver, Colorado, 80045, United States|Smilow Cancer Hospital at Yale-New Haven, New Haven, Connecticut, 06510, United States|Sylvester Comprehen…	Study Protocol, https://cdn.clinicaltrials.gov/large-docs/07/NCT03474107/Prot_000.pdf|Statistical Analysis Plan, https://cdn.clinicaltrials.gov/large-docs/07/NCT03474107/SAP_001.pdf
NCT05043987	CPO102	Claudin 18.2	Dose Escalation and Expansion Study of CPO102, an Anti-claudin 18.2 ADC in Patients With Advanced Cancers	https://clinicaltrials.gov/study/NCT05043987		WITHDRAWN	This Phase 1 study will be a multicenter, single agent, dose escalation and dose expansion study conducted in patients with advanced late stage cancer (pancreatic or gastric including esophageal junction cancers) for which the investigator determines there to be no other standard of care or higher priority therapies available.	NO	Pancreatic Cancer|Gastric Cancer	DRUG: CPO102	Number of participants with dose-limiting toxicities (DLTs) during the DLT evaluation period., DLTs are assessed during the first cycle (21 days) in each cohort to determine maximum tolerated dose (MTD) and/or recommended phase 2 dose (RP2D)., through study completion, an average of 3 year	Number of participants with treatment-emergent adverse events (TEAEs) including Grade ≥ 3, serious, fatal TEAE by relationship., TEAEs will be graded according to the National Cancer Institute Common Terminology Criteria for Adverse Events (NCI-CTCAE) v 5.0., through study completion, an average of 3 year|Number of participants with clinically significant changes in vital signs, Number of partici…		Conjupro Biotherapeutics, Inc.	CSPC Megalith Biopharmaceutical Co., Ltd.	ALL	ADULT, OLDER_ADULT	PHASE1	0	INDUSTRY	INTERVENTIONAL	Allocation: NON_RANDOMIZED|Intervention Model: SEQUENTIAL|Masking: NONE|Primary Purpose: TREATMENT	CPO102-US-1001	2022-11-16	2022-11-16	2022-11-16	2021-09-14		2023-09-07
NCT05279300	CS5001	ROR1	A Study of CS5001 in Patients With Advanced Solid Tumors and Lymphomas	https://clinicaltrials.gov/study/NCT05279300		RECRUITING	This is a first-in-human (FIH) study to evaluate the safety and preliminary efficacy of experimental drug CS5001 in patients with advanced hematological and solid tumors.	NO	Advanced Solid Tumor|Advanced Lymphoma	DRUG: CS5001	Maximum Tolerated Dose (MTD) of CS5001 if any (for dose escalation part), Participants will receive CS5001 for injection once every three weeks. The MTD will be determined by the number of participants who experience a dose limiting toxicity (DLT)., About 6 months|Recommended Phase 2 Dose(RP2D) of CS5001 (for dose escalation part), The selection of RP2D will be based on consideration of overall s…	Concentration of CS5001 total antibody, prodrug and the free cytotoxin, Up to 30 days since the last dose of or until initiation of a new anti-cancer treatment, whichever occurs first|Concentration of anti-CS5001 antibodies, Up to 30 days since the last dose of or until initiation of a new anti-cancer treatment, whichever occurs first	Anti-tumor activity of CS5001 at RP2D in patient with selected advanced cancers (For dose expansion part), About up to 12 months	CStone Pharmaceuticals		ALL	ADULT, OLDER_ADULT	PHASE1	156	INDUSTRY	INTERVENTIONAL	Allocation: NON_RANDOMIZED|Intervention Model: SEQUENTIAL|Masking: NONE|Primary Purpose: TREATMENT	CS5001-101	2022-03-28	2025-03-30	2025-06-30	2022-03-15		2024-03-29	North Shore Hematology Oncology Associates, East Setauket, New York, 11733, United States|Columbia U. - Herbert Irving Comprehensive Cancer Center, New York, New York, 10032, United States|BUMC - Mary Crowley Cancer Research Centers (MCCRC), Dallas, Texas, 75201-7307, United States|Scientia Clinical Research Limited, Randwick, New South Wales, 2031, Australia|Ashford Cancer Centre Research, Adela…
NCT03281824	ALT-P7	ERBB2	Clinical Study of ALT-P7 to Determine Safety, Tolerability and Pharmacokinetics in Breast Cancer Patients	https://clinicaltrials.gov/study/NCT03281824		COMPLETED	This open-label study assessed the safety, tolerability and pharmacokinetics of ALT-P7(HM2-Drug Conjugate) in patients with HER2-positive metastatic breast cancer who have progressed on previous Trastuzumab-based therapy. Patients received ALT-P7(0.3 mg/kg\~5.4 mg/kg, 7 groups) intravenously on Day 1 of each 3-week cycle.	NO	HER2-positive Breast Cancer	BIOLOGICAL: ALT-P7 (HM2-MMAE)	DLT test, Determination of Maximum Tolerated Dose(MTD) and the dose level showing Dose Limiting Toxicity(DLT), or determination of Recommended Phase II Dose(RP2D) as an alternative to MTD establishment, 21 days after first administration	Incidence of Treatment-Emergent Adverse Events, Evaluate adverse events by the Common Terminology Criteria for Adverse Event (CTCAE v4.03) classification, immune-related adverse events(irAEs), up to 4 weeks|Pharmacokinetics test, analyze metabolism and discover the fate of a ALT-P7 from administration up to completely eliminated from the body (Group 3(1.2 mg/kg) \~ Group 7(5.4 mg/kg)), up to 4 we…		Alteogen, Inc.		FEMALE	ADULT, OLDER_ADULT	PHASE1	27	INDUSTRY	INTERVENTIONAL	Allocation: NA|Intervention Model: SINGLE_GROUP|Masking: NONE|Primary Purpose: OTHER	ALT-P7	2018-01-11	2020-03-12	2021-01-15	2017-09-13		2022-01-18	Alteogen, Daejeon, Korea, Republic of
NCT06161025	R-DXd	CDH6	A Study of Raludotatug Deruxtecan (R-DXd) in Subjects With Platinum-resistant, High-grade Ovarian, Primary Peritoneal, or Fallopian Tube Cancer	https://clinicaltrials.gov/study/NCT06161025		RECRUITING	This study will evaluate the safety and efficacy of R-DXd therapy in participants with ovarian, peritoneal, or fallopian tube cancer	NO	Solid Cancer	DRUG: R-DXd|DRUG: Gemcitabine|DRUG: Paclitaxel|DRUG: Topotecan|DRUG: PLD	Percentage of Participants With Objective Response Rate (ORR) Based on Blinded Independent Central Review (BICR) Assessment (Part A), The ORR was defined as the percentage of participants who achieved Best Overall Response (BOR) of confirmed Complete Response (CR) or Partial Response (PR), by BICR assessment based on RECIST version 1.1., From date of randomization to data cut off, up to 18 months…	Percentage of Participants With Objective Response Rate (ORR) Based on Investigator Assessment, The ORR was defined as the percentage of participants who achieved Best Overall Response (BOR) of confirmed Complete Response (CR) or Partial Response (PR), by Investigator assessment based on RECIST version 1.1., From date of randomization to data cut off, up to 30 months|Duration of Response (DOR), D…		Daiichi Sankyo	Merck Sharp & Dohme LLC	ALL	ADULT, OLDER_ADULT	PHASE2|PHASE3	650	INDUSTRY	INTERVENTIONAL	Allocation: RANDOMIZED|Intervention Model: SEQUENTIAL|Masking: NONE|Primary Purpose: TREATMENT	DS6000-109|REJOICE-Ovarian01|ENGOT-ov77|GOG-3096	2024-02-27	2027-12-31	2029-12-31	2023-12-07		2024-06-28	Fudan University Shanghai Cancer Center, Shanghai, 200032, China|National Cancer Center Hospital, Chuo-ku, 104-0045, Japan|NHO Kyushu Cancer Center, Fukuoka-shi, 811-1395, Japan|Saitama Medical University International Medical Center, Hidaka-shi, 350-1298, Japan|National Cancer Center Hospital East, Kashiwa-shi, 277-8577, Japan|Cancer Institute Hospital of JFCR, Koto-ku, 135-8550, Japan|Jikei Uni…
NCT03254732	pembrolizumab	PD-L1	Study ADI-PEG 20 Plus Pembrolizumab in Advanced Solid Cancers	https://clinicaltrials.gov/study/NCT03254732		TERMINATED	This is a phase 1b, open label trial of ADI-PEG 20 (36 mg/m2) weekly in combination with pembrolizumab (1 and 2 mg/kg or 200 mg) every three weeks. Assessment of safety and tolerability of drug combination	NO	Advanced Solid Cancers	DRUG: ADI PEG20|DRUG: Pembrolizumab	Number of Participants with Adverse Events as a Measure of Safety and Tolerability of ADI-PEG 20 in combination with Pembrolizumab in Advanced Solid Cancers, Number of participants with treatment-related adverse events and severity this is graded by CTCAE and MedDRA for Coding, Up to 36 months	Number of Participants with PFS with Combination ADI-PEG 20 and Pembro., Progression Free Survival determined by RECIST 1.1, Assessments ever 9 weeks for 12 months|Number of Participants with RR with Combination ADI-PEG 20 and Pembro., Response Rate determined by RECIST 1.1, Assessments ever 9 weeks for 12 months	Overall Survival, Follow-Up by Phone or Clinic Visit, 12 months after end of treatment	Polaris Group		ALL	ADULT, OLDER_ADULT	PHASE1	33	INDUSTRY	INTERVENTIONAL	Allocation: NA|Intervention Model: SINGLE_GROUP|Masking: NONE|Primary Purpose: TREATMENT	POLARIS2016-002	2017-07-14	2019-05-07	2020-02-25	2017-08-18		2022-04-27	Facility National Cheng Kung University, Tainan, 704, Taiwan
NCT05688605	MRG003	EGFR	A Study of MRG003 in the Treatment of Patients With EGFR-positive Advanced or Metastatic Solid Tumors	https://clinicaltrials.gov/study/NCT05688605		RECRUITING	The objective of this study is to assess the safety, efficacy, pharmacokinetics, and immunogenicity of MRG003 in combination with HX008 in patients with EGFR-positive advanced or metastatic solid tumors.	NO	Advanced Solid Tumors	DRUG: MRG003+HX008	Maximum Tolerated Dose (MTD), MTD is the highest dose with the proportion of DLT less than 1/3, Within 21 days after the first dose of the last patient of the MTD group|Recommended Phase II Dose (RP2D), The dose level of MRG003 recommended for further clinical studies based on assessment of the safety, efficacy and PK data from this study., Baseline to study completion (up to 12 months)|Objective…	Duration of Response (DOR), DOR is defined as the duration from the initial recording of objective disease response to the first onset of tumor progression, or death of any cause., Baseline to study completion (up to 12 months)|Disease Control Rate (DCR), DCR is defined as the proportion of subjects achieving CR, PR, and SD after treatment., Baseline to study completion (up to 12 months)|Progress…		Shanghai Miracogen Inc.		ALL	ADULT, OLDER_ADULT	PHASE1|PHASE2	18	INDUSTRY	INTERVENTIONAL	Allocation: NA|Intervention Model: SINGLE_GROUP|Masking: NONE|Primary Purpose: TREATMENT	HX008/MRG003-C001	2022-06-30	2024-05-25	2024-07-25	2023-01-18		2023-01-18	Sun Yat-sen University Cancer Center, Guangzhou, Guangdong, 510060, China|Hunan Cancer Hospital, Changsha, Hunan, 410029, China
NCT03383692	Trastuzumab deruxtecan	ERBB2	Study of DS-8201a for Participants With Advanced Solid Malignant Tumors	https://clinicaltrials.gov/study/NCT03383692		COMPLETED	HER2-positive cancer is a cancer that tests positive for a protein called human epidermal growth factor receptor 2 (HER2). HER2 promotes the growth of certain cancer cells. This study will test an experimental drug called DS-8201a that has not been approved by the health authorities yet. DS-8201a will be tested for safety in patients with advanced solid malignant tumors that test positive for HER…	YES	Neoplasm Metastasis	DRUG: DS-8201a|DRUG: Ritonavir|DRUG: Itraconazole	Pharmacokinetic Parameter of Maximum (Peak) Observed Serum Concentration (Cmax) Following Treatment With DS-8201a and Ritonavir - Cohort 1, Maximum concentration (Cmax) was assessed for DS-8201a and total Anti-HER2 antibody., Cycle 1: Day 1, pre-dose and end of infusion (EOI); Cycles 2 and 3: Day 1, pre-dose, EOI, 2 hours, 4 hours, 7 hours; Day 2, 4, 8, 12, 17, and 22; Cycles 4, 6 and 8: Day 1, p…	Best Objective Response as Confirmed By The Investigator's Assessment in Participants With HER2-Expressing Advanced Solid Malignant Tumors, Best objective response (BOR) was assessed by the investigator based on Response Evaluation Criteria In Solid Tumors (RECIST) version 1.1. Completed response (CR) was defined as a disappearance of all target lesions, PR was defined as at least a 30% decrease …		Daiichi Sankyo Co., Ltd.	AstraZeneca	ALL	ADULT, OLDER_ADULT	PHASE1	40	INDUSTRY	INTERVENTIONAL	Allocation: NON_RANDOMIZED|Intervention Model: SEQUENTIAL|Masking: NONE|Primary Purpose: TREATMENT	DS8201-A-A104|173790	2018-01-12	2018-09-26	2023-09-11	2017-12-26	2021-06-14	2023-12-11	Hokkaido Cancer Center, Sapporo, Hokkaido, 003-0804, Japan|Hokkaido University Hospital, Sapporo, Hokkaido, 060-8648, Japan|Kobe University Hospital, Kobe, Hyogo, 650-0017, Japan|Hamamatsu University Hospital, Hamamatsu, Shizuoka, 431-3125, Japan|Shizuoka Cancer Center, Nagaizumicho, Shizuoka, 411-0934, Japan|National Cancer Center Hospital, Chuo Ku, Tokyo, 104-0045, Japan|The Cancer Institute Ho…	Study Protocol and Statistical Analysis Plan, https://cdn.clinicaltrials.gov/large-docs/92/NCT03383692/Prot_SAP_000.pdf
NCT05797168	AZD5335	FOLR1	Phase I/IIa Study for AZD5335 as Monotherapy and in Combination With Anti-cancer Agents in Participants With Solid Tumors	https://clinicaltrials.gov/study/NCT05797168	FONTANA	RECRUITING	This research is designed to determine if experimental treatment with Antibody-drug conjugate, AZD5335, alone, or in combination with anti-cancer agents is safe, tolerable, and has anti-cancer activity in patients with advanced tumors	NO	Ovarian Cancer|Lung Adenocarcinoma	DRUG: AZD5335|DRUG: AZD5305	Number of participants with adverse events/serious adverse events, Number of participants with incidence of adverse events and with serious adverse events including changes from baseline in laboratory parameters, vital signs, ECGs, and physical examination., From time of Informed Consent to 30 days post last dose.|The number of participants with dose limiting toxicity(DLT), as defined in the prot…	Objective Response Rate (ORR), The percentage of participants with a confirmed CR or PR according to RECIST v1.1 criteria., From time of Informed Consent to progressive disease or withdrawal of consent.(approx 2 years)|Duration of Response (DoR), The time from the date of first response until date of disease progression or death in the absence of disease progression., From the first documented re…		AstraZeneca		ALL	ADULT, OLDER_ADULT	PHASE1|PHASE2	150	INDUSTRY	INTERVENTIONAL	Allocation: NA|Intervention Model: SEQUENTIAL|Masking: NONE|Primary Purpose: TREATMENT	D8990C00001	2023-06-05	2027-11-01	2027-11-01	2023-04-04		2024-05-01	Research Site, Duarte, California, 91010, United States|Research Site, Irvine, California, 92618, United States|Research Site, La Jolla, California, 92093, United States|Research Site, Aurora, Colorado, 80045, United States|Research Site, Louisville, Kentucky, 40202, United States|Research Site, Boston, Massachusetts, 02114, United States|Research Site, Columbus, Ohio, 43201, United States|Resear…
NCT05399654	TAC-001	CD22	A Dose Escalation and Expansion Study of TAC-001 in Patients With Select Advanced or Metastatic Solid Tumors	https://clinicaltrials.gov/study/NCT05399654	INCLINE-101	RECRUITING	INCLINE-101 is an open label, multicenter Phase 1/2 study designed to evaluate safety, pharmacokinetics (PK), and preliminary anti-tumor activity of TAC-001 administered intravenously.	NO	Advanced or Metastatic Solid Tumors	DRUG: TAC-001	Dose-Escalation Stage: RP2D for TAC-001, To identify the recommended dose phase 2 dose (RP2D) for further evaluation of TAC-001 when administered as monotherapy in subjects with advanced or metastatic solid tumors, 2-years|Dose Expansion: Characterization of ORR for TAC-001, To evaluate preliminary efficacy of TAC-001 by estimating the overall response rate (ORR; combined complete response \[CR\]…	Incidence and Severity of Nonserious Adverse Events (AEs) and Serious Adverse Events (SAEs), To evaluate the safety of TAC-001 monotherapy through the evaluation of incidence and severity of nonserious AEs and SAEs, including immune-related adverse events (irAEs), as graded by investigators according to CTCAE version 5.0, 2 years|Maximum Plasma Concentration (Cmax), To evaluate the Cmax of TAC-00…		Tallac Therapeutics		ALL	ADULT, OLDER_ADULT	PHASE1|PHASE2	200	INDUSTRY	INTERVENTIONAL	Allocation: NA|Intervention Model: SINGLE_GROUP|Masking: NONE|Primary Purpose: TREATMENT	INCLINE-101	2022-06-28	2026-01-27	2026-05-19	2022-06-01		2024-01-22	University of Southern California (USC), Los Angeles, California, 90033, United States|University of Colorado, Aurora, Colorado, 80045, United States|Sarah Cannon Research Institute (SCRI)- Denver, Denver, Colorado, 80218, United States|AdventHealth Cancer Institute, Orlando, Florida, 32804, United States|Sarah Cannon Research Institute (SCRI)- Florida Cancer Specialists and Research Institute, L…
NCT02302339	Glembatumumab Vedotin	GPNMB	A Study of Glembatumumab Vedotin as Monotherapy or in Combination With Immunotherapies in Patients With Advanced Melanoma	https://clinicaltrials.gov/study/NCT02302339		TERMINATED	This study will examine the effectiveness and safety of glembatumumab vedotin as monotherapy or in combination with immunotherapies in patients with advanced melanoma.	YES	Melanoma	DRUG: glembatumumab vedotin|DRUG: glembatumumab vedotin and varlilumab|DRUG: glembatumumab vedotin and PD-1 targeted checkpoint inhibitor (nivolumab OR pembrolizumab)|DRUG: glembatumumab vedotin and CDX-301	Objective Response Rate (ORR), ORR is defined as the percentage of patients who achieved best overall response of complete or partial response. Per Response Evaluation Criteria In Solid Tumors Criteria (RECIST version 1.1), Complete Response (CR) = disappearance of all target lesions and non-target lesions, Partial Response (PR), \>= 30% decrease in the sum of the longest diameter of target lesio…	Duration of Response (DOR), DOR is the number of months from the time criteria are first met for either CR or PR, until the first date that PD is objectively documented per RECIST 1.1., From start date of partial or complete response (whichever is achieved first) to first date that recurrent of progressive disease is objectively documented, assessed up to 18 months.|Progression-free Survival (PFS…		Celldex Therapeutics		ALL	ADULT, OLDER_ADULT	PHASE2	132	INDUSTRY	INTERVENTIONAL	Allocation: NON_RANDOMIZED|Intervention Model: SINGLE_GROUP|Masking: NONE|Primary Purpose: TREATMENT	CDX011-05	2024-11-14	2018-06-14	2018-10-03	2014-11-27	2019-09-06	2019-09-06	The Angeles Clinic and Research Institute, Los Angeles, California, 90025, United States|Northern California Melanoma Center/St. Mary's Medical Center, San Francisco, California, 94117, United States|Florida Cancer Specialists, Fort Myers, Florida, 33916, United States|Mount Sinai Comprehensive Cancer Center, Miami Beach, Florida, 33140, United States|Florida Cancer Specialists, West Palm Beach, …	Study Protocol, https://cdn.clinicaltrials.gov/large-docs/39/NCT02302339/Prot_000.pdf|Statistical Analysis Plan, https://cdn.clinicaltrials.gov/large-docs/39/NCT02302339/SAP_001.pdf
NCT04822337	Belantamab mafodotin	BCMA	Study of Carfilzomib, Lenalidomide, Dexamethasone and Belantamab Mafodotin in Multiple Myeloma	https://clinicaltrials.gov/study/NCT04822337		ACTIVE_NOT_RECRUITING	This research study is being done to learn if the study drug belantamab mafodotin, in combination with other standard medications, can improve multiple myeloma. This study will also help determine what effects, good and/or bad, this combination of study drugs have on subjects and their cancer, and to evaluate the overall response to this study treatment combination.	NO	Multiple Myeloma	DRUG: Carfilzomib, Lenalidomide, Dexamethasone, Belantamab Mafodotin	Establish Maximum Tolerated Dose (MTD), DLTs will be determined for each subject enrolled in Phase I as a binary variable indicating whether the subject experienced a DLT during Cycle 1 of belantamab mafodotin-containing protocol directed induction therapy., time to complete Cycle 1 (28 days)|Evaluate Complete Response (CR), CR will be determined for each subject as a binary variable indicating w…	Complete Response (CR), CR will be determined for each subject as a binary variable indicating whether the achieved a best overall response to induction therapy of CR or better, Up to 5 years|Best Response, The best overall response will be determined as an ordered categorial variable indicating the subject's best response at any point along the treatment continuum., Up to 5 years|Very Good Parti…	Safety - Serious Adverse Events (SAEs), The SAE variable will be determined for each subject as a binary variability indicating whether or not subject experienced a protocol-defined SAE., Up to 4-8 weeks post treatment discontinuation|Safety - Adverse Events (AEs), The AE variable will be determined for each subject as a binary variability indicating whether or not subject experienced an AE per C…	Wake Forest University Health Sciences	Amgen|GlaxoSmithKline	ALL	ADULT, OLDER_ADULT	PHASE1|PHASE2	70	OTHER	INTERVENTIONAL	Allocation: NON_RANDOMIZED|Intervention Model: SEQUENTIAL|Masking: NONE|Primary Purpose: TREATMENT	IRB00081609|Pro00050160|LCI-HEM-NDMYE-KRDB-001	2021-05-19	2024-10-24	2024-10-24	2021-03-30		2024-04-16	Levine Cancer Institute, Charlotte, North Carolina, 28204, United States
NCT04887870	Enfortumab vedotin	Nectin-4	Study of Sitravatinib With or Without Other Anticancer Therapies Receiving Clinical Benefit From Parent Study	https://clinicaltrials.gov/study/NCT04887870		ACTIVE_NOT_RECRUITING	A Study of Sitravatinib Alone or in Combination with Other Anticancer Therapies in Advanced or Metastatic Malignancies	NO	Advanced or Metastatic Solid Malignancies	DRUG: Sitravatinib|DRUG: Nivolumab|DRUG: Pembrolizumab|DRUG: Enfortumab Vedotin-Ejfv|DRUG: Ipilimumab	Frequency of subjects experiencing treatment-related AEs., Frequency of subjects experiencing treatment-related AEs., 24 Months	Time to clinical or radiographic progression on study., Time to clinical or radiographic progression on study., 24 Months		Mirati Therapeutics Inc.		ALL	ADULT, OLDER_ADULT	PHASE2|PHASE3	55	INDUSTRY	INTERVENTIONAL	Allocation: NA|Intervention Model: SINGLE_GROUP|Masking: NONE|Primary Purpose: TREATMENT	CA248-0003|CA248-0003|516-014	2021-06-30	2025-04-19	2025-04-19	2021-05-14		2024-06-21	Local Institution - 516-014-021, Littleton, Colorado, 80218, United States|Local Institution - 516-014-029, Goshen, Indiana, 46526, United States|Local Institution - 516-014-002, Boston, Massachusetts, 02215, United States|Local Institution - 516-014-014, Detroit, Michigan, 48201, United States|Local Institution - 516-014-005, Minneapolis, Minnesota, 55455, United States|Local Institution - 516-0…
NCT04941339	MRG002	ERBB2	A Study of MRG002 in the Treatment of Patients With HER2-positive Advanced Solid Tumors	https://clinicaltrials.gov/study/NCT04941339		UNKNOWN	The objective of this study is to assess the safety, efficacy, pharmacokinetics, and immunogenicity of MRG002 in patients with HER2-positive advanced solid tumors.	NO	Advanced Solid Tumor	DRUG: MRG002	Maximum Tolerated Dose (MTD), The highest dose confirmed wherein ≤ 1/6 of patients in a treatment cohort experiences a dose-limiting toxicity (DLT)., DLT will be evaluated during the first treatment cycle (Day 1-28)|Recommended Phase II Dose (RP2D), The dose level of MRG002 recommended for further clinical studies based on assessment of the safety, efficacy and PK data from this study., Baseline …	Objective Response Rate (ORR), ORR is defined as the proportion of subjects with CR and PR assessed by IRC and investigator according to RECIST v1.1., Baseline to study completion (up to 6 months)|Duration of Response (DoR), DoR is defined as the duration from the initial recording of objective disease response to the first onset of tumor progression, or death of any cause., Baseline to study com…		Shanghai Miracogen Inc.		ALL	ADULT, OLDER_ADULT	PHASE1	74	INDUSTRY	INTERVENTIONAL	Allocation: NA|Intervention Model: SINGLE_GROUP|Masking: NONE|Primary Purpose: TREATMENT	MRG002-001	2018-11-21	2024-10-22	2024-10-22	2021-06-28		2021-12-03	Shanghai Oriental Hospital, Shanghai, Shanghai, 200120, China
NCT03505710	Trastuzumab deruxtecan	ERBB2	DS-8201a in Human Epidermal Growth Factor Receptor 2 (HER2)-Expressing or -Mutated Non-Small Cell Lung Cancer	https://clinicaltrials.gov/study/NCT03505710	DESTINY-Lung01	COMPLETED	The primary objective of this trial is to evaluate the efficacy of trastuzumab deruxtecan in HER2-overexpressing and/or HER2-mutated advanced NSCLC participants.	YES	Non-Small Cell Lung Cancer	DRUG: Trastuzumab deruxtecan	Percentage of Participants With Objective Response Rate (ORR) Based on Independent Central Review Following Treatment With DS8201a in Participants With HER2-Over-Expressing or -Mutated Non-Small-Cell Lung Cancer (NSCLC), The Objective Response Rate (ORR) was the defined as the percentage of participants who achieved a best overall response of confirmed Complete Response (CR) or Partial Response (…	Percentage of Participants With Objective Response Rate (ORR) Based on Investigator Assessment Following Treatment With DS8201a in Participants With HER2-Over-Expressing or -Mutated Non-Small-Cell Lung Cancer (NSCLC), The Objective Response Rate (ORR) was defined as the percentage of participants who achieved a best overall response of confirmed Complete Response (CR) or Partial Response (PR), as…		Daiichi Sankyo	Daiichi Sankyo Co., Ltd.|AstraZeneca	ALL	ADULT, OLDER_ADULT	PHASE2	181	INDUSTRY	INTERVENTIONAL	Allocation: NON_RANDOMIZED|Intervention Model: PARALLEL|Masking: NONE|Primary Purpose: TREATMENT	DS8201-A-U204|2017-004781-94|JapicCTI-183916	2018-05-21	2021-05-03	2024-04-17	2018-04-23	2022-05-17	2024-04-29	University of California San Diego (UCSD), La Jolla, California, 92093-1503, United States|University of Colorado Hospital, Aurora, Colorado, 80045, United States|Moffitt Cancer Center, Tampa, Florida, 33612, United States|Dana-Farber Cancer Institute, Boston, Massachusetts, 02215, United States|University of Michigan, Ann Arbor, Michigan, 48109, United States|Karmanos Cancer Institute, Detroit, …	Study Protocol and Statistical Analysis Plan, https://cdn.clinicaltrials.gov/large-docs/10/NCT03505710/Prot_SAP_000.pdf
NCT06028932	Sacituzumab Govitecan	TROP2	A Study of Sacituzumab Govitecan (IMMU-132) in Platinum-resistant Ovarian Cancer Patients	https://clinicaltrials.gov/study/NCT06028932		RECRUITING	This is a non-randomized Phase 2 study of sacituzumab govitecan (IMMU-132) in subjects with recurrent or persistent platinum-resistant epithelial ovarian, fallopian tube, or primary peritoneal cancers.	NO	Ovarian Carcinoma	DRUG: Sacituzumab govitecan	Objective Response Rate (ORR), Objective response rate (complete response and partial response rates) by RECIST1.1 criteria in patients with platinum resistant recurrent ovarian carcinoma., 4 Years	Duration of overall survival (OS), Overall survival is defined as the duration of time from study entry to death or the date of last contact., 6 Years|Duration of progression free survival (PFS), Progression free survival is defined as the duration of time from study entry to time of progression, death, or is censored at date of last disease assessment, 6 Years|Durable disease control rate (DDCR)…		Yale University	Gilead Sciences	FEMALE	ADULT, OLDER_ADULT	PHASE2	20	OTHER	INTERVENTIONAL	Allocation: NA|Intervention Model: SINGLE_GROUP|Masking: NONE|Primary Purpose: TREATMENT	2000036114|No NIH funding	2024-01-08	2025-11-01	2027-11-01	2023-09-08		2024-01-11	Smilow Cancer Hospital at Yale New Haven, New Haven, Connecticut, 06510, United States
NCT01963052	AGS15E	SLITRK6	ASG-15ME is a Study of Escalating Doses of AGS15E Given as Monotherapy in Subjects With Metastatic Urothelial Cancer	https://clinicaltrials.gov/study/NCT01963052		COMPLETED	The objectives of this study are to assess the safety, pharmacokinetics, immunogenicity and anti-tumor activity of AGS15E in subjects with metastatic urothelial cancer who failed at least one prior chemotherapy regimen for metastatic disease.	NO	Metastatic Urothelial Cancer	DRUG: AGS15E	Incidence of adverse events, up to 36 months|Pharmacokinetic parameter for total antibody (TAb), antibody drug conjugate (ADC), and Monomethyl Auristatin E (MMAE): Concentration at the end of infusion (CEOI), Days 1-4, 8, 15-18 and 22 of Cycle 1 and Days 1, 8, 15, 22 of Cycles 2 and 3, and Day 1 of subsequent cycles up to an average of 6 months|Pharmacokinetic parameter for total antibody (TAb), …	Incidence of Anti-Drug Antibody (ADA), Up to 26 months|Tumor response, Incidence of tumor response defined as either a complete response (CR) or partial response (PR) per RECIST criteria (version 1.1) that should be confirmed ≥ 28 days later, Up to 26 months|Objective response rate, Defined as the percentage of subjects who experience a best response of either CR or PR in that cohort. CR and PR s…		Astellas Pharma Global Development, Inc.	Seagen Inc.	ALL	ADULT, OLDER_ADULT	PHASE1	93	INDUSTRY	INTERVENTIONAL	Allocation: NON_RANDOMIZED|Intervention Model: PARALLEL|Masking: NONE|Primary Purpose: TREATMENT	AGS15E-13-1	2013-11-14	2019-07-08	2019-07-08	2013-10-16		2020-06-24	Site US00006, Birmingham, Alabama, 35294, United States|Site US00002, New Haven, Connecticut, 06510, United States|Site US00001, Detroit, Michigan, 48201, United States|Site US00003, Saint Louis, Missouri, 63110, United States|Site US00009, Buffalo, New York, 14263, United States|Site US00011, Pittsburgh, Pennsylvania, 15232, United States|Site US00010, Nashville, Tennessee, 37212, United States|…
NCT03682796	TRPH-222	CD22	Study of TRPH-222 in Patients With Relapsed and/or Refractory B-Cell Lymphoma	https://clinicaltrials.gov/study/NCT03682796		COMPLETED	This is a Phase 1, multi-center, open-label study of TRPH-222 monotherapy in subjects with relapsed and/or refractory B-cell NHL. The study will be conducted in two Stages: Dose-Escalation, Dose-Expansion.	NO	Lymphoma|Lymphoma, B-Cell|Lymphoma, Non-Hodgkin|Lymphoma, Mantle-Cell|Lymphoma, Marginal Zone|Lymphoma, Large B-Cell, Diffuse|Lymphoma, Follicular	DRUG: TRPH-222	Maximum Tolerated Dose (MTD), To determine the MTD of TRPH-222, 21 days	Evaluate incidence and severity of AEs, serious AEs, TRPH-222-related AEs, AEs leading to death or discontinuation from treatment, Safety, Up to 28 days after last dose of study drug|Tumor Activity, Assess tumor response - ORR for each NHL subtype using Lugano criteria, PFS from first dose to disease progression, OS from first dose to death, DOR for each NHL subtype assessed by Lugano, Up to 2 ye…		Triphase Research and Development III Corp.		ALL	ADULT, OLDER_ADULT	PHASE1	32	INDUSTRY	INTERVENTIONAL	Allocation: NON_RANDOMIZED|Intervention Model: SEQUENTIAL|Masking: NONE|Primary Purpose: TREATMENT	TRPH-222-100	2018-10-15	2021-11-17	2021-11-17	2018-09-25		2022-05-19	Banner MD Anderson, Gilbert, Arizona, 85234, United States|Roswell Park Comprehensive Cancer Center, Buffalo, New York, 14263, United States|Ohio State University Comprehensive Cancer Center, Columbus, Ohio, 43219, United States|Abramson Cancer Center of the University of Pennsylvania, Philadelphia, Pennsylvania, 19104, United States|Sarah Cannon Research Institute at Tennessee Oncology, Nashvill…
NCT06147037	[225Ac]-FPI-2068	FAP	A Phase 1, Dose-escalation Study of [225Ac]-FPI-2068 in Adult Patients With Advanced Solid Tumours	https://clinicaltrials.gov/study/NCT06147037		RECRUITING	This is a first-in-human, Phase 1, non-randomized, multicenter, open-label clinical study designed to investigate the safety, tolerability, dosimetry, biodistribution, and pharmacokinetics (PK) of \[225Ac\]-FPI-2068, \[111In\]-FPI-2107, and FPI-2053 in metastatic and/or recurrent solid tumors (HNSCC, NSCLC, mCRC, PDAC).	NO	Advanced Solid Tumor|Metastatic Colorectal Carcinoma|Head and Neck Squamous Cell Carcinoma|Non-small Cell Lung Cancer|Pancreatic Ductal Adenocarcinoma	DRUG: FPI-2053|DRUG: [111In]-FPI-2107|DRUG: [225Ac]-FPI-2068	Evaluate safety and tolerability of [111In]-FPI-2107, FPI-2053, and [225Ac]-FPI-2068, ? Incidence of Adverse Events and evaluation of dosimetry, Approximately 4 years post final administration|Radiation dose of [111In]-FPI-2107 and [225Ac]-FPI-2068 to whole body, organs, and selected regions of interest., * For Part A, evaluate the impact of pre-dose administration of FPI-2053 on the radiation do…	Assess preliminary anti-tumor activity of [225Ac]-FPI-2068, ? Tumour assessments will be based on RECIST v1.1 (Eisenhauer et al, 2009) and will be performed approximately every 8 weeks (± 1 week) after the first \[225Ac\]-FPI-2068 dose, or as clinically indicated., Approximately 4 years post final administration|Tumor uptake of [111In]-FPI-2107, ? Tumor uptake of \[111In\]-FPI-2107 in selected re…		Fusion Pharmaceuticals Inc.	AstraZeneca	ALL	ADULT, OLDER_ADULT	PHASE1	110	INDUSTRY	INTERVENTIONAL	Allocation: NA|Intervention Model: SEQUENTIAL|Masking: NONE|Primary Purpose: TREATMENT	FPI-2068-101	2024-07-31	2026-12-30	2027-12-30	2023-11-27		2024-07-01	Hoag Hospital, Irvine, California, 92618, United States|Stanford Hospital and Clinics, Stanford, California, 94305, United States|University of Chicago, Chicago, Illinois, 60637, United States|Dana-Farber Cancer Institute, Boston, Massachusetts, 02215, United States|Washington University in St. Louis, Saint Louis, Missouri, 63110, United States|Cleveland Clinic, Cleveland, Ohio, 44195, United Sta…
NCT01166490	ASG-5ME	SLC44A4	A Phase 1 Dose Escalation Trial of ASG-5ME in Pancreatic or Gastric Adenocarcinoma	https://clinicaltrials.gov/study/NCT01166490		COMPLETED	This is a phase 1, open-label, dose-escalation clinical trial to evaluate the safety and tolerability of ASG-5ME and identify the maximum tolerated dose in patients with pathologically confirmed metastatic pancreatic adenocarcinoma, and to evaluate safety and tolerability in patients with relapsed or refractory gastric adenocarcinoma.	NO	Gastric Neoplasms|Pancreatic Neoplasms	DRUG: ASG-5ME	Incidence of adverse events and laboratory abnormalities, Through 1 month after last dose	Best clinical response, Every 2 months|Overall and progression-free survival, Every month until death or study closure|Concentrations of ASG-5ME and metabolites in blood, Through 1 month after last dose|Incidence of antitherapeutic antibodies in blood, Through 1 month after last dose		Seagen Inc.	Agensys, Inc.	ALL	ADULT, OLDER_ADULT	PHASE1	51	INDUSTRY	INTERVENTIONAL	Allocation: NA|Intervention Model: SINGLE_GROUP|Masking: NONE|Primary Purpose: TREATMENT	ASG5ME-002	2024-07-10	2024-07-13	2024-07-13	2010-07-21		2013-08-27	TGen Clinical Research Service at Scottsdale Healthcare, Scottsdale, Arizona, 85259, United States|University of California at San Francisco, San Francisco, California, 94115, United States|University of Chicago, Chicago, Illinois, 60637-1470, United States|Dana-Farber Cancer Institute, Boston, Massachusetts, 02215, United States|Texas Oncology - Baylor Sammons Cancer Center, Dallas, Texas, 75246…
NCT05263479	HS-20089	B7-H4	A Study of HS-20089 in Patients With Advanced Solid Tumors	https://clinicaltrials.gov/study/NCT05263479		RECRUITING	HS-20089 is a novel DAR-6 antibody-drug conjugate （ADC） targeting B7-H4. In preclinical studies, it inhibited tumor cell growth expressing B7-H4 in vitro and in vivo. The first-in-human trial is conducted to assess the maximum tolerated dose (MTD) and dose limiting toxicity (DLT), to evaluate the pharmacokinetics, safety and preliminary anti-tumor activity of HS-20089 in Patients With Advanced So…	NO	Advanced Solid Tumor	DRUG: HS-20089 (Phase Ia：Dose escalation )|DRUG: HS-20089 (Phase Ib: Dose expansion)	Maximum Tolerated Dose of HS-20089, To determine the MTD for further evaluation of IV administration of HS-20089 in subjects with advanced solid tumors., 3 weeks after initiation of treatment	Incidence and severity of treatment-emergent adverse events, The CTCAE criteria will be used to assess adverse events on this trial., Baseline through study completion(90 days after last dose)|Observed maximum plasma concentration (Cmax) after single dose of HS-20089, Cmax will be obtained after single dose of HS-20089 on Day 1., From pre-dose to 120 hours after single dose on Day 1|Observed maxi…		Shanghai Hansoh Biomedical Co., Ltd		ALL	ADULT, OLDER_ADULT	PHASE1	177	INDUSTRY	INTERVENTIONAL	Allocation: NON_RANDOMIZED|Intervention Model: SEQUENTIAL|Masking: NONE|Primary Purpose: TREATMENT	HS-20089-101	2022-01-05	2024-12-31	2026-12-31	2022-03-02		2024-04-03	Fudan University Cancer Hospital, Shanghai, Shanghai, 200032, China
NCT04450732	GQ1001	ERBB2	Safety of GQ1001 in Adult Patients With HER2-Positive Advanced Solid Tumors	https://clinicaltrials.gov/study/NCT04450732		RECRUITING	Phase I Dose Finding Study for GQ1001 in Patients with HER2-Positive Advanced Solid Tumors	NO	HER2-positive Breast Cancer|HER2-positive Biliary Tract Cancer|HER2-Positive Salivary Gland Carcinomas|HER2-Positive Advanced Solid Tumor	DRUG: GQ1001	Dose Limiting Toxicities (DLTs)., Adverse events will be assessed using NCI CTCAE version 5.0 and will be evaluated by the investigator and the sponsor for the eligibility of DLT., End of Cycle 1 (21-day cycle)|Maximum Tolerated Dose (MTD) or Dose Recommended for Dose Expansion (DRDE), The SRC will also determine the MTD/DRDE based on the totality of data for all tested dose levels., After each c…	Incidence and Severity of Adverse Events (AEs), Safety and Tolerability of GQ1001, from baseline to 30 days after last dose|Number of Participants with Abnormal Laboratory Values, Safety and Tolerability of GQ1001, rom baseline through Cycle 8 (each cycle is 21 days) and up to 30 days from treatment discontinuationafter last dose|Area Under the Plasma Concentration Versus Time Curve (AUC) of GQ10…		GeneQuantum Healthcare (Suzhou) Co., Ltd.		ALL	ADULT, OLDER_ADULT	PHASE1	96	INDUSTRY	INTERVENTIONAL	Allocation: NON_RANDOMIZED|Intervention Model: SEQUENTIAL|Masking: NONE|Primary Purpose: TREATMENT	GQ1001X2101	2020-07-07	2024-03-01	2024-05-01	2020-06-29		2023-12-05	M.D. Anderson Cancer Center, Houston, Texas, 77030, United States|Scientia Clinical Research Limited, Randwick, New South Wales, 2031, Australia|Cabrini Institute in Melbourne, Australia, Melbourne, Victoria, 3050, Australia|The first affiliated hospital of Bengbu medical college, Bengbu, Anhui, 233099, China|Beijing Tongren Hospital Affiliated to Capital University of Medical Sciences, Beijing, …
NCT04595565	Sacituzumab Govitecan	TROP2	Sacituzumab Govitecan in Primary HER2-negative Breast Cancer	https://clinicaltrials.gov/study/NCT04595565	SASCIA	ACTIVE_NOT_RECRUITING	Phase III, prospective, multi-center, randomized, open label, parallel group, study in patients with HER2-negative breast cancer with residual disease after neoadjuvant chemotherapy with 1:1 allocation to: * Arm A: Sacituzumab govitecan (days 1, 8 q3w for eight cycles); * Arm B: treatment of physician′s choice (TPC, defined as capecitabine or platinum-based chemotherapy for eight cycles or observ…	NO	HER2-negative Breast Cancer|Triple Negative Breast Cancer	DRUG: Capecitabine|DRUG: Carboplatin|DRUG: Cisplatin|DRUG: Sacituzumab govitecan	Invasive disease free survival (iDFS) between patients treated with sacituzumab govitecan vs. treatment of physician's choice., iDFS is defined as time from randomization until first iDFS event: local invasive recurrence following mastectomy, local invasive recurrence in the ipsilateral breast following lumpectomy, regional recurrence, distant recurrence, contralateral invasive breast cancer, sec…	To compare overall survival (OS) between patients treated with sacituzumab govitecan vs. treatment of physician's choice., OS is defined as the time from randomization until death from any cause. One interim analysis of the key secondary endpoint OS will be performed at the time of the final analysis of the iDFS., Assuming 3.25 years of recruitment 398 events will be needed with a power of 80% an…		German Breast Group	Gilead Sciences|Austrian Breast & Colorectal Cancer Study Group|Spanish Breast Cancer Research Group (GEICAM)|ETOP IBCSG Partners Foundation|Cancer Trials Ireland|UNICANCER	ALL	ADULT, OLDER_ADULT	PHASE3	1332	OTHER	INTERVENTIONAL	Allocation: RANDOMIZED|Intervention Model: PARALLEL|Masking: NONE|Primary Purpose: TREATMENT	GBG102 - SASCIA	2020-10-28	2027-03-30	2029-03-30	2020-10-20		2024-06-17	MUG - Univ.-Klinik f. Frauenheilkunde u. Geburtshilfe Graz, Graz, 8036, Austria|MUG - Univ.-Klinik f. Innere Medizin Graz, Graz, 8036, Austria|MUI - Univ. Klinik f. Frauenheilkunde Innsbruck, Innsbruck, 6020, Austria|Ordensklinikum Linz GmbH - BHS, Linz, 4010, Austria|TumorZentrum Kepler Uniklinikum Linz, Linz, 4020, Austria|LKH Salzburg - PMU, Salzburg, 5020, Austria|Universit?tsklinikum St. P?l…
NCT04644068	Trastuzumab deruxtecan	ERBB2	Study of AZD5305 as Monotherapy and in Combination With Anti-cancer Agents in Patients With Advanced Solid Malignancies	https://clinicaltrials.gov/study/NCT04644068	PETRA	RECRUITING	This research is designed to determine if experimental treatment with PARP inhibitor, AZD5305, alone, or in combination with anti-cancer agents is safe, tolerable, and has anti-cancer activity in patients with advanced solid tumors.	NO	Ovarian Cancer|Breast Cancer|Pancreatic Cancer|Prostate Cancer|Additional Indications Below for Module 4 and 5|Non-small Cell Lung Cancer|Colorectal Cancer|Bladder Cancer|Gastric Cancer|Biliary Cancer|Cervical Cancer|Endometrial Cancer|Small Cell Lung Cancer Only in Module 5	DRUG: AZD5305|DRUG: Paclitaxel|DRUG: Carboplatin|DRUG: T- Dxd|DRUG: Dato-DXd|DRUG: Camizestrant	The number of subjects with adverse events/serious adverse events, Number of patients with adverse events and with serious adverse events including abnormal clinical observations, abnormal ECG parameters, abnormal laboratory assessments and abnormal vital signs that changed from baseline, From time of Informed Consent to 28 + 7 days post last dose ( modules 1,2,3,5 and 6). 40+7 days post last dos…	Best percentage change in target lesion, Change in target lesion size from baseline, as defined by RECIST 1.1., From Screening to confirmed progressive disease (approximately 1 year)|Objective Response Rate, Best response until progression, as defined by RECIST 1.1., From Screening to confirmed progressive disease (approximately 1 year)|Duration of Response, Time from first response to progressio…		AstraZeneca		ALL	ADULT, OLDER_ADULT	PHASE1|PHASE2	804	INDUSTRY	INTERVENTIONAL	Allocation: NON_RANDOMIZED|Intervention Model: SEQUENTIAL|Masking: NONE|Primary Purpose: TREATMENT	D9720C00001|2020-002688-77	2020-11-12	2026-12-15	2026-12-15	2020-11-25		2024-06-25	Research Site, San Francisco, California, 94143, United States|Research Site, Boston, Massachusetts, 02114, United States|Research Site, Boston, Massachusetts, 02215, United States|Research Site, New York, New York, 10021, United States|Research Site, Oklahoma City, Oklahoma, 73104, United States|Research Site, Houston, Texas, 77030, United States|Research Site, Heidelberg, 3084, Australia|Resear…
NCT04786847	177Lu-DOTA-TLX591	PSMA	177Lu-DOTA-TLX591 Safety, Biodistribution and Dosimetry Study	https://clinicaltrials.gov/study/NCT04786847	ProstACTSelect	COMPLETED	This is a Phase 1 trial of TLX591, a monoclonal antibody HuX591 conjugated with a DOTA chelator and radiolabelled with 177Lu (177Lu-DOTA-TLX591). TLX591 is being developed as a PSMA-targeting antibody to be radiolabelled with a therapeutic radiosotope for the treatment of PSMA-expressing tumours, therefore this study has been designed to assess the safety and tolerability, pharmacokinetics, whole…	NO	Metastatic Prostate Cancer	BIOLOGICAL: 177Lu-DOTA-TLX591	Number of Participants With Treatment-Related Adverse Events as Assessed by CTCAE v5.0, To monitor the safety and tolerability of molecularly targeted radiotherapy with 177Lu-DOTA-TLX591, administered in two cycles in combination with best SoC in patients with PSMA-expressing metastatic castrate resistant prostate cancer. Treatment emergent adverse events (TEAE) will be classified according to Me…	Whole body and organ uptake of 177Lu-DOTA-TLX591, Quantitate the absorbed radiation doses (expressed as Gy/MBq) of administered 177Lu-DOTA-TLX591) to kidneys, liver, lungs, spleen, bone/red marrow and salivary glands below acceptable safe limits as defined by ARPANSA, Day 1 to Day 15|Compare the whole body and organ uptake of 177Lu-TLX591 and 68Ga-PSMA-11 radioactive tracers, Qualitatively equiva…		Telix Pharmaceuticals (Innovations) Pty Limited		MALE	ADULT, OLDER_ADULT	PHASE1	30	INDUSTRY	INTERVENTIONAL	Allocation: NA|Intervention Model: SINGLE_GROUP|Masking: NONE|Primary Purpose: TREATMENT	177Lu-TLX591-001	2022-01-30	2023-09-30	2023-09-30	2021-03-08		2024-02-12	GenesisCare Newcastle, Newcastle, Gateshead, 2290, Australia|Diagnostic Nuclear Imaging at Hollywood Private Hospital, Perth, Western Australia, 6009, Australia|GenesisCare SJOg Medical Centre,Murdoch, Perth, Western Australia, 6150, Australia
NCT04316442	STI-6129	CD38	Study of the Safety and Efficacy of STI-6129 in Patients With Relapsed or Refractory Systemic AL Amyloidosis	https://clinicaltrials.gov/study/NCT04316442		RECRUITING	The STI-6129-001 study is a three-stage, multicenter, open-label, dose-finding, phase 1b/2a trial. It is designed primarily to identify the recommended phase 2 dose (RP2D) of STI-6129 by assessing the safety, preliminary efficacy and pharmacokinetics of this anti-CD38-Duostatin 5.2 antibody-drug conjugate (ADC) for the treatment of relapsed or refractory systemic AL amyloidosis. The patients that…	NO	Light Chain (AL) Amyloidosis	BIOLOGICAL: STI-6129	Safety and tolerability of STI-6129 in AL amyloidosis patients, Types, frequencies, and severities of adverse events (AEs) and the relationships of AEs to study drug; includes serious adverse events (SAEs), neurotoxicity, dose-limiting toxicities (DLTs), and laboratory abnormalities, Baseline through study completion at up to 14 months	Overall hematological response rate according to the 2012 Consensus Round Table response criteria, Proportion of subjects with Complete Response (CR), Very Good Partial Response (VGPR), Partial Response (PR), No Response (NR) and Progressive Disease (PD), Baseline through study completion at up to 14 months|Organ response rates (cardiac, renal, hepatic, peripheral nervous system) according to the…		Sorrento Therapeutics, Inc.		ALL	ADULT, OLDER_ADULT	PHASE1|PHASE2	60	INDUSTRY	INTERVENTIONAL	Allocation: NA|Intervention Model: SINGLE_GROUP|Masking: NONE|Primary Purpose: TREATMENT	STI-6129-001	2021-04-01	2024-09-24	2024-12-24	2020-03-20		2023-01-17	City of Hope National Medical Center, Duarte, California, 91010, United States|Boston Medical Center, Boston, Massachusetts, 02118, United States|Barbara Ann Karmanos Cancer Institute Wertz Clinic, Detroit, Michigan, 48201, United States|Froedtert Hospital & the Medical College of Wisconsin, Milwaukee, Wisconsin, 53226, United States
NCT05280470	Ifinatamab deruxtecan	CD276	Ifinatamab Deruxtecan (I-DXd) in Subjects With Pretreated Extensive-Stage Small Cell Lung Cancer (ES-SCLC)	https://clinicaltrials.gov/study/NCT05280470	IDeate-Lung01	ACTIVE_NOT_RECRUITING	This 2-part study intends to define the recommended Phase 2 dose of ifinatamab deruxtecan (I-DXd) based on the efficacy, safety, and pharmacokinetics (PK) results observed in participants with Extensive-stage Small Cell Lung Cancer (ES-SCLC) who received at least 1 prior line of platinum-based chemotherapy and a maximum of 3 prior lines of therapy (Part 1) and a minimum of two previous lines of s…	NO	Extensive-stage Small-cell Lung Cancer	DRUG: Ifinatamab Deruxtecan (I-DXd)	Percentage of Participants With Objective Response Rate (ORR) Based on Blinded Independent Central Review (BICR) Following Treatment With I-DXd in Participants With Pretreated ES-SCLC, ORR was defined as the percentage of participants who achieved a best overall response (BOR) of confirmed Complete Response (CR) or Partial Response (PR), assessed by BICR based on RECIST version 1.1. For all targe…	Number of Participants With Treatment-Emergent Adverse Events (TEAEs) Following Treatment With I-DXd in Participants With Pretreated ES-SCLC, TEAEs are defined as new adverse events (AEs) that occur after the dose of study drug or as AEs that were present prior to the dose of study drug but which worsened in severity after the start of study drug., Up to approximately 36 months|Progression-Free S…		Daiichi Sankyo	Merck Sharp & Dohme LLC	ALL	ADULT, OLDER_ADULT	PHASE2	187	INDUSTRY	INTERVENTIONAL	Allocation: RANDOMIZED|Intervention Model: PARALLEL|Masking: NONE|Primary Purpose: TREATMENT	DS7300-127|2022-000503-13|2041220019	2022-03-09	2025-01-31	2025-04-17	2022-03-15		2024-06-18	Highlands Oncology Group, Springdale, Arkansas, 72762, United States|The Cancer Specialists, Llc, Jacksonville, Florida, 32256, United States|H. Lee Moffitt Cancer Center and Research Institute, Tampa, Florida, 33612, United States|University of Chicago Medical Center, Chicago, Illinois, 60637, United States|Johns Hopkins Sidney Kimmel Comprehensive Cancer Center, Baltimore, Maryland, 21287, Unit…
NCT06157892	Disitamab vedotin	ERBB2	A Study of Disitamab Vedotin Alone or With Other Anticancer Drugs in Solid Tumors	https://clinicaltrials.gov/study/NCT06157892		RECRUITING	This clinical trial is studying solid tumor cancers. A solid tumor is one that starts in part of your body like your lungs or liver instead of your blood. Once they've grown bigger in one spot or spread to other parts of the body, they're harder to treat. This is called advanced or metastatic cancer. Participants in this study must have breast cancer or gastric cancer. Participants must have tumo…	NO	Breast Neoplasms|Gastroesophageal Junction Adenocarcinoma|HER2 Low Breast Neoplasms|HER2 Positive Breast Neoplasms|Stomach Neoplasms|Triple Negative Breast Neoplasms	DRUG: disitamab vedotin|DRUG: tucatinib	Number of participants with dose limiting toxicities DLTs) in dose escalation phase, Up to 28 days|Number of participants with adverse events (AEs), Any untoward medical occurrence in a clinical study participant, temporally associated with the use of study intervention, whether or not considered related to the study intervention, Through 30 days after the last study treatment; approximately 5 ye…	Duration of response (DOR) per RECIST v1.1 by investigator assessment, The time from start of the first documentation of objective tumor response of CR or PR (that is subsequently confirmed) to the first documentation of progressive disease (PD) per RECIST v1.1, or to death due to any cause, Approximately 5 years|Disease control rate (DCR) per RECIST v1.1 by investigator assessment, The proportio…		Seagen Inc.	RemeGen Co., Ltd.	ALL	ADULT, OLDER_ADULT	PHASE1|PHASE2	198	INDUSTRY	INTERVENTIONAL	Allocation: RANDOMIZED|Intervention Model: SEQUENTIAL|Masking: NONE|Primary Purpose: TREATMENT	SGNDV-004	2024-05-20	2030-01-31	2030-01-31	2023-12-06		2024-07-03	Chao Family Comprehensive Cancer Center University of California Irvine, Orange, California, 92868, United States|UCLA Department of Medicine - Hematology & Oncology, Santa Monica, California, 90404, United States|Colorado West Healthcare, dba Grand Valley Oncology, Grand Junction, Colorado, 81505, United States|Praxair Cancer Center / Danbury Hospital, Danbury, Connecticut, 06810, United States|…
NCT04602117	Trastuzumab Duocarmazine	ERBB2	ISPY-P1.01:Evaluating the Safety of Weekly Paclitaxel With Trastuzumab Duocarmazine (SYD985) in Patients With Metastatic Cancer	https://clinicaltrials.gov/study/NCT04602117		WITHDRAWN	This is an open-label, single-arm, multi-site phase I/Ib trial with SYD985, an antibody-drug conjugate (ADC) targeting HER2 on the cell membrane, combined with paclitaxel.	NO	HER2-positive Breast Cancer|HER2 Low|SYD-985|SYD985|Vic-trastuzumab Duocarmazine|Metastatic Cancer|Metastatic Breast Cancer|Metastatic Gastrointestinal Carcinoid Tumor|Metastatic|HER2 Low Breast Cancer|GastroEsophageal Cancer|Gastroesophageal Adenocarcinoma|Endometrium Tumor|Ovarian Cancer|Ovarian Carcinoma|HER2-positive Gastric Cancer|HER2-positive Metastatic Breast Cancer|HER2 Mutation-Related …	DRUG: Vic-trastuzumab duocarmazine (SYD985) + paclitaxel	Common Toxicity Criteria for Adverse Events (CTCAE 5.0), To determine safety and tolerability of the weekly paclitaxel with tri-weekly trastuzumab duocarmazine (SYD985) combination in patients with certain advanced solid tumors Toxicity, incidence and grade, Dose Limiting Toxicity (DLT), Maximum Tolerated Dose (MTD), Recommended Phase 2 Dose (RP2D), up to 12 months|Clinical Benefit Rate (CBR) at …	Progression Free Survival (PFS) of patients treated with the weekly paclitaxel with tri-weekly trastuzumab duocarmazine (SYD985) combination, Endpoint: PFS RECIST 1.1, up to 12 months|Duration of response (DOR) of patients treated with the weekly paclitaxel with tri-weekly trastuzumab duocarmazine (SYD985) combination, Endpoints: Duration of response Outcome measures:, up to 12 months		QuantumLeap Healthcare Collaborative	Byondis B.V.	ALL	ADULT, OLDER_ADULT	PHASE1	0	OTHER	INTERVENTIONAL	Allocation: NA|Intervention Model: SINGLE_GROUP|Masking: NONE|Primary Purpose: TREATMENT	ISPY-P1.01	2021-07-28	2021-11-17	2021-11-17	2020-10-26		2023-11-18	University of Colorado Cancer Center, Aurora, Colorado, 80045, United States
NCT02226276	Trastuzumab emtansine	ERBB2	Copper Cu 64-DOTA-Trastuzumab PET in Predicting Response to Treatment With Ado-Trastuzumab Emtansine in Patients With Metastatic HER2 Positive Breast Cancer	https://clinicaltrials.gov/study/NCT02226276		ACTIVE_NOT_RECRUITING	This pilot clinical trial studies how well copper Cu 64-tetra-azacyclododecanetetra-acetic acid (DOTA)-trastuzumab positron emission tomography (PET) works in predicting response to treatment with ado-trastuzumab emtansine in patients with human epidermal growth factor receptor 2 (HER2) positive breast cancer that has spread to other places in the body. Copper Cu 64-DOTA-trastuzumab is a chemothe…	YES	Bone Metastases|HER2-positive Breast Cancer|Liver Metastases|Lung Metastases|Recurrent Breast Cancer|Soft Tissue Metastases|Stage IV Breast Cancer	RADIATION: fludeoxyglucose F 18|PROCEDURE: positron emission tomography|PROCEDURE: computed tomography|BIOLOGICAL: trastuzumab|RADIATION: copper Cu 64-DOTA-trastuzumab|PROCEDURE: positron emission tomography|BIOLOGICAL: ado-trastuzumab emtansine|OTHER: laboratory biomarker analysis	Relationship Between Average Tumor Uptake of Copper Cu 64-DOTA-trastuzumab as Measured by PET and Patient Best Response, Relationship between patient best response to T-DM1 and measured tumor uptake of 64Cu-DOTA-trastuzumab employed a t-test with a 0.05 two-sided significance level comparing average uptake in responsive vs non-responsive patients. Tumor uptake measured as SUV defined as SUV = AC(…			City of Hope Medical Center	National Cancer Institute (NCI)	FEMALE	ADULT, OLDER_ADULT	NA	10	OTHER	INTERVENTIONAL	Allocation: NA|Intervention Model: SINGLE_GROUP|Masking: NONE|Primary Purpose: DIAGNOSTIC	14099|NCI-2014-01812|14099	2015-01-07	2021-12-07	2024-12-07	2014-08-27	2022-07-20	2024-02-20	City of Hope Medical Center, Duarte, California, 91010, United States	Study Protocol and Statistical Analysis Plan, https://cdn.clinicaltrials.gov/large-docs/76/NCT02226276/Prot_SAP_000.pdf
NCT06176261	Datopotamab Deruxtecan	TROP2	DATO-BASE: DATOpotamab-deruxtecan for Breast Cancer Brain metAstaSEs	https://clinicaltrials.gov/study/NCT06176261		RECRUITING	The purpose of this study is to test the safety and effectiveness of the study drug datopotamab deruxtecan in participants with metastatic breast cancer that has spread to the brain. The name of the study drug used in this research study is: Datopotamab deruxtecan (a type of antibody-drug conjugate)	NO	Breast Cancer|Breast Cancer Female|Metastatic Triple-Negative Breast Carcinoma|ER Positive Breast Cancer|HER2-negative Breast Cancer|HER2 Negative Breast Carcinoma|ER-negative Breast Cancer	DRUG: Datopotamab Deruxtecan	Objective Response Rate (ORR) in RANO-BM Criteria, The objective response rate (ORR) was defined as the proportion of participants achieving complete response (CR) or partial response (PR) based on RANO-BM criteria defined protocol section 11.1.1., 3 years	Objective Response Rate (ORR), The objective response rate (ORR) was defined as the proportion of participants achieving complete response (CR) or partial response (PR) based on RECISTv1.1 criteria., 3 years|Clinical Benefit Rate at 18 weeks (CBR18), CBR defined as proportion of participants with defined as intracranial CR, intracranial PR, or stable disease (SD) in both intracranial and extracra…		Sarah Sammons, MD	Daiichi Sankyo	ALL	ADULT, OLDER_ADULT	PHASE2	58	OTHER	INTERVENTIONAL	Allocation: NON_RANDOMIZED|Intervention Model: PARALLEL|Masking: NONE|Primary Purpose: TREATMENT	23-533	2023-12-26	2028-01-01	2029-01-01	2023-12-19		2024-03-12	Dana-Farber Cancer Institute, Boston, Massachusetts, 02215, United States
NCT06238687	Luveltamab Tazevibulin	FOLR1	A Study of STRO-002 in Chinese Adults With Epithelial Ovarian Cancer and Other Advanced Malignant Solid Tumors	https://clinicaltrials.gov/study/NCT06238687		RECRUITING	This is a multi-center, open-label, monotherapy dose escalation, PK bridging, and dose expansion Phase I/IIa study in Chinese adult subjects to evaluate the safety, tolerability, Pharmacokinetics (PK) profiles, immunogenicity, and preliminary efficacy of STRO-002 in patients with advanced malignant solid tumors.	NO	Neoplasm Malignant	BIOLOGICAL: STRO-002	DLT Assessment, Toxicity associated with the treatment of the investigational drug STRO-002., From Day1 to Day21 after first dose of STRO-002|AE Assessment, The frequency of AE, From first dose of STRO-002 until 28 days after the last dose of STRO-002|AUC, PK parameter：area under the concentration-time curve (AUC), From first dose of STRO-002 until 28 days after the last dose of STRO-002.|Cmax, P…	Occurrence of positive anti-drug antibodies (ADAs) and changes over time., Occurrence of positive anti-drug antibodies (ADAs), From first dose of STRO-002 until 28 days after the last dose of STRO-002.|Duration of response (DOR), DOR is defined as the time from the first documented response (CR or PR evaluated by RECIST v1.1) until the time of first documentation of disease progression by RECIST …		Tasly Pharmaceutical Group Co., Ltd	Sutro Biopharma, Inc.	ALL	ADULT, OLDER_ADULT	PHASE1|PHASE2	132	INDUSTRY	INTERVENTIONAL	Allocation: NON_RANDOMIZED|Intervention Model: SEQUENTIAL|Masking: NONE|Primary Purpose: TREATMENT	TSL-B2276-1-01	2023-11-08	2026-12-30	2027-12-30	2024-02-02		2024-02-02	West China Hospital of Sichuan University, Chengdu, Sichuan, China
NCT04280341	Disitamab vedotin	ERBB2	JS001 in Combination With RC48-ADC in Treatment of HER2-Positive Advanced Malignant Solid Tumors	https://clinicaltrials.gov/study/NCT04280341		RECRUITING	This is a non-randomized, open-label, single-arm, multicenter Phase I clinical trial which will evaluate the Safety, Efficacy, Tolerability and Pharmacokinetics of RC48-ADC in combinaton with Anti-PD1 Monoclonal Antibody in Treatment of HER2-Positive Advanced Malignant Solid Tumors.	NO	HER2-Positive Solid Tumors	BIOLOGICAL: RC48-ADC in combinaton with JS001	DLT(dose-limiting toxicity) or Maximal Tolerance Dose (MTD), Side effects of drug or treatment that are serious enough to prevent an increase in dose or level of that treatment. The MTD is defined as the previous dose level., 28 days|adverse events, Safety of participants followed for the duration of hospital stay, an expected average of 1 week, 1 year	ORR, Percentage of patients who achieve partial response (PR) or complete response (CR) based on Response Evaluation Criteria In Solid Tumors (RECIST v1.1)., From date of first dose until the date of first documented progression or date of death from any cause, whichever came first, assessed up to 24 months|DOR, The percentage of patients who achieve complete remission(CR) or partial remission, F…		Peking University	RemeGen Co., Ltd.	ALL	ADULT, OLDER_ADULT	PHASE1	50	OTHER	INTERVENTIONAL	Allocation: NA|Intervention Model: SINGLE_GROUP|Masking: NONE|Primary Purpose: TREATMENT	RC48-C013	2020-06-03	2024-12-24	2024-12-24	2020-02-21		2023-08-25	Beijing Cancer Hospital, Beijing, Beijing, 100142, China
NCT04928612	CBP-1018	PSMA	A Study of CBP-1018 in Patients With Advanced Solid Tumors	https://clinicaltrials.gov/study/NCT04928612		RECRUITING	This is an open-label, non-randomized, multi-center, phase I study of bi-ligand-drug conjugate CBP-1018 in patients with advanced solid tumors. This study will be conducted in 2 parts: Part A (Dose Escalation) and Part B (Dose Expansion). Both parts include screening period, treatment period, end of treatment (EOT)/withdrawal, safety follow-up (SFU) and long-term-follow-up (LTFU). CBP-1018 will b…	NO	Solid Tumor	DRUG: CBP-1018	Incidence and severity of Adverse Events (AEs) in Part A, Incidence of dose limiting toxicity (DLTs), treatment-emergent adverse events (TEAE), treatment-related adverse events, serious adverse events (SAEs) and clinically significant changes in vital signs, physical examinations, electrocardiogram (ECGs), and clinical laboratory tests per the National Cancer Institute's Common Terminology Criter…	Maximum serum concentration (Cmax), Maximum serum concentration (Cmax) of CBP-1018 will be investigated., 12 months|Time to maximum serum concentration (Tmax) of CBP-1018, Tmax of CBP-1018 will be investigated., 12 months|Elimination half-life (T1/2) of CBP-1018, T1/2 of CBP-1018 will be investigated., 12 months|AUC0-t of CBP-1018, AUC0-t is defined as area under the serum concentration-time curv…	Neuroendocrine or small cell transformation-associated markers of mCRPC, Neuroendocrine or small cell transformation-associated markers of mCRPC, 12 months|Potential metabolites of CBP-1018, Potential metabolites of CBP-1018 in human plasma, urine, feces, if appropriate., 12 months|Biomarkers, Biomarkers in tumor tissues with relationships of CBP-1018 efficacy/safety including,but not limited to,…	Coherent Biopharma (Suzhou) Co., Ltd.		ALL	ADULT, OLDER_ADULT	PHASE1	170	INDUSTRY	INTERVENTIONAL	Allocation: NA|Intervention Model: SINGLE_GROUP|Masking: NONE|Primary Purpose: TREATMENT	CBP-1018-101	2021-11-04	2024-12-23	2024-10-24	2021-06-16		2023-03-29	Sun Yat-Sen memorial hospital, Sun Yat-Sen University, Guangzhou, Guangdong, 510288, China|Tianjin Medical University Cancer Institute and Hospital, Tianjin, Tianjin, 300060, China
NCT01963715	Laprituximab emtansine	EGFR	A Phase 1 Study of IMGN289 in Adult Patients With EGFR-positive Solid Tumors	https://clinicaltrials.gov/study/NCT01963715		TERMINATED	This is a Phase 1, first-in-human study to determine the recommended dose of IMGN289 in adult patients with advanced EGFR-positive tumors.	NO	EGFR Positive Solid Tumors	DRUG: IMGN289	Number of participants with dose limiting toxicities, Up to 2 years	Number of participants with adverse events, Up to 2 years|Area under the plasma concentration versus time curve, Determine the amount of IMGN289 in participants blood (pharmacokinetics), Up to 2 years|Peak plasma concentration (Cmax) of IMGN289, Determine the amount of IMGN289 in participants blood (pharmacokinetics), Up to 2 years|Presence of Human Anti Human Antibody and Human Anti Drug Antibod…		ImmunoGen, Inc.		ALL	ADULT, OLDER_ADULT	PHASE1	20	INDUSTRY	INTERVENTIONAL	Allocation: NA|Intervention Model: SINGLE_GROUP|Masking: NONE|Primary Purpose: TREATMENT	IMGN0501	2024-10-13	2024-04-15	2024-04-15	2013-10-16		2015-10-02	Cedars-Sinai Medical Center, Los Angeles, California, 90048, United States|Sidney Kimmel Comprehensive Cancer Center at Johns Hopkins, Baltimore, Maryland, 21287, United States|Dana Farber Cancer Institute, Boston, Massachusetts, 02215, United States|Karmanos Cancer Institute, Detroit, Michigan, 48201, United States
NCT05653271	ACE1831	CD20	ACE1831 in Adult Subjects With Relapsed/ Refractory CD20-expressing B-cell Malignancies	https://clinicaltrials.gov/study/NCT05653271		RECRUITING	ACE1831 is an off-the-shelf, allogeneic gamma delta T (gdT) cell therapy derived from healthy donors, that is under investigation for the treatment of CD20-expressing B-cell malignancies. The ACE1831-001 study is an open-label, Phase I, first-in-human (FIH) study that aims to evaluate the safety and tolerability, pharmacokinetics and pharmacodynamics, and efficacy of ACE1831 in patients with CD20…	NO	B-cell Lymphoma|Non Hodgkin Lymphoma|DLBCL|Primary Mediastinal Large B Cell Lymphoma|Marginal Zone Lymphoma|Follicular Lymphoma	DRUG: Cyclophosphamide|DRUG: Fludarabine|DRUG: ACE1831|DRUG: Obinutuzumab	Incidence of adverse events (AEs), Dose Limiting Toxicities (DLTs), adverse events of special interest (AESIs), and serious adverse events (SAEs), 2 years|Change from baseline in ECOG status, 1 year|Change from baseline in physical examination results, Number of subject with change from baseline clinically significant physical examination findings by dose level (descriptive), 1 year|Change from b…	Persistence of ACE1831 after administration, Half-life of ACE1831, 1 month|Measure of anti-ACE1831 antibodies after administration, Titration of anti-ACE1831 antibodies after administration, 1 month|Objective Response Rate (ORR), Objective response of each patient's underlying lymphoma, duration of response, and progression-free survival all based on the revised IWG Response Criteria for Malignan…	Pharmacodynamics of ACE1831, Serum levels of interferon-γ, TNF-α, IL-2, IL-6, IL-8 and IL-10, as well as other potential biomarkers, 2 years	Acepodia Biotech, Inc.		ALL	ADULT, OLDER_ADULT	PHASE1	42	INDUSTRY	INTERVENTIONAL	Allocation: NON_RANDOMIZED|Intervention Model: SEQUENTIAL|Masking: NONE|Primary Purpose: TREATMENT	ACE1831-001	2023-01-21	2024-09-25	2024-09-27	2022-12-16		2024-02-28	AdventHealth Orlando, Orlando, Florida, 32804, United States|Emory University, Atlanta, Georgia, 30322, United States|Indiana University Simon Comprehensive Cancer Center, Indianapolis, Indiana, 46202, United States|Norton Cancer Institute, Louisville, Kentucky, 40207, United States|The University of Texas MD Anderson Cancer Center, Houston, Texas, 77030, United States|Tamsui MacKay Memorial Hosp…
NCT05276609	HS-20093	CD276	ARTEMIS-001: Phase 1 Study of the HS-20093 in Patients With Advanced Solid Tumors	https://clinicaltrials.gov/study/NCT05276609		RECRUITING	HS-20093 is a fully humanized IgG1 antibody-drug conjugate (ADC) which specifically binds to B7-H3, a target wildly expressed on solid tumor cells. The objectives of this study are to investigate the safety, tolerability, pharmacokinetics and anti-tumor activity of HS-20093 in Chinese advanced solid tumor patients. This is a phase 1, open-label, multi-center, dose-escalation and expansion study e…	NO	Advanced Solid Tumor	DRUG: HS-20093 (Phase Ia: Dose escalation)|DRUG: HS-20093 (Phase Ib: Dose expansion)	Ⅰa (Dose-Escalation Stage): Maximum tolerated dose (MTD) for HS-20093, To determine the MTD for further evaluation of IV administration of HS-20093 in subjects with advanced solid tumors., Up to day 21 from the first dose|Ⅰb (Dose-Expansion Stage): Objective response rate (ORR) determined by investigators according to Response Evaluation Criteria in Solid Tumors (RECIST) 1.1, Objective tumor resp…	Incidence and severity of adverse events (AEs), AE assessed by investigator exclusively related to subject's underlying disease or medical condition \[graded according to the NCI Common Terminology Criteria for Adverse Events (CTCAE), Version 5.0\]. Any untoward medical occurrence in a clinical study participant, whether or not considered related to the medicinal product. Incidence and severity o…		Shanghai Hansoh Biomedical Co., Ltd		ALL	ADULT, OLDER_ADULT	PHASE1	177	INDUSTRY	INTERVENTIONAL	Allocation: NON_RANDOMIZED|Intervention Model: SEQUENTIAL|Masking: NONE|Primary Purpose: TREATMENT	HS-20093-101	2021-11-28	2023-12-31	2023-12-31	2022-03-11		2023-02-15	Cancer Hospital Chinese Academy of Medical Sciences, Beijing, Beijing, 100021, China
NCT02973672	SGM-101	CEACAM5	Phase I of SGM-101 in Patients With Cancer of the Colon, Rectum or Pancreas	https://clinicaltrials.gov/study/NCT02973672		COMPLETED	This study evaluates the safety and performance of SGM-101, a Carcinoembryonic Antigen (CEA)-specific chimeric antibody conjugated with a NIR emitting fluorochrome, for the visualization of CEA-expressing cancers during surgery. SGM-101 is injected 2 to 4 days before surgery and visualized using an optimized camera system.	NO	Colon Cancer|Rectum Cancer|Pancreas Cancer|Metastatic Colorectal Cancer|Recurrent Colorectal Carcinoma	DRUG: SGM-101	Number of patients with treatment-related adverse events, An Adverse Event (AE) is any untoward medical occurrence in a subject who is participating in a clinical study performed. The adverse event does not necessarily have to follow the administration of a study drug, or to have a causal relationship with the study drug. An adverse event can therefore be any unfavourable and unintended sign (inc…	Tumor-to-background ratio (TBR) for fluorescence, day 4|Serum SGM-101 concentrations, Individual serum SGM-101 concentrations will be plotted versus time per individual using both a linear and log y-axis. Additionally, concentration versus time curves will be plotted per treatment group as a spaghetti plot. Concentrations will be summarized by treatment group., up to 1 month after surgery		Surgimab	Centre for Human Drug Research, Netherlands|Leiden University Medical Center|Erasmus Medical Center|Catharina Ziekenhuis Eindhoven	ALL	ADULT, OLDER_ADULT	PHASE1|PHASE2	75	INDUSTRY	INTERVENTIONAL	Allocation: NA|Intervention Model: SINGLE_GROUP|Masking: NONE|Primary Purpose: DIAGNOSTIC	SGM-CLIN02	2024-01-16	2019-04-15	2024-05-19	2016-11-25		2019-07-18	Catharina Ziekenhuis Eindhoven, Eindhoven, Netherlands|Leiden University Medical Center, Leiden, 2333 CL, Netherlands|Erasmus Medical Center Cancer Institute, Rotterdam, Netherlands
NCT06203210	Ifinatamab Deruxtecan	CD276	A Study of Ifinatamab Deruxtecan Versus Treatment of Physician's Choice in Subjects With Relapsed Small Cell Lung Cancer	https://clinicaltrials.gov/study/NCT06203210	IDeate-Lung02	RECRUITING	This study was designed to compare the efficacy and safety of I-DXd with treatment of physician's choice in participants with relapsed small cell lung cancer (SCLC).	NO	Small Cell Lung Cancer	DRUG: Ifinatamab deruxtecan|DRUG: Topotecan|DRUG: Amrubicin|DRUG: Lurbinectedin	Number of Participants With Objective Response Rate Assessed by Blinded Independent Central Review, Confirmed objective response rate (ORR) is defined as the sum of the complete response (CR) rate and partial response (PR) rate based on BICR by Response Evaluation Criteria In Solid Tumors (RECIST) v1.1., Baseline up until documented progressive disease, death, lost to follow-up, or withdrawal by …	Number of Participants With Objective Response Rate Assessed by Investigator, Confirmed objective response rate (ORR) is defined as the sum of the complete response (CR) rate and partial response (PR) rate based on investigator by Response Evaluation Criteria In Solid Tumors (RECIST) v1.1., Baseline up until documented progressive disease, death, lost to follow-up, or withdrawal by the participan…		Daiichi Sankyo	Merck Sharp & Dohme LLC	ALL	ADULT, OLDER_ADULT	PHASE3	468	INDUSTRY	INTERVENTIONAL	Allocation: RANDOMIZED|Intervention Model: PARALLEL|Masking: NONE|Primary Purpose: TREATMENT	DS7300-188|2023-509628-16	2024-05-21	2027-04-30	2029-02-22	2024-01-12		2024-06-27	Highlands Oncology Group, Springdale, Arkansas, 72762, United States|Providence Medical Foundation, Fullerton, California, 92835, United States|David Geffen School of Medicine, Los Angeles, California, 90095, United States|Ucsf Mount Zion Medical Ctr, San Francisco, California, 94115, United States|University of Miami Hospital and Clinics Sylvester Comprehensive Cancer Center, Miami, Florida, 331…
NCT05103683	TORL-1-23	CLaudin 6	First in Human Study of TORL-1-23 in Participants With Advanced Cancer	https://clinicaltrials.gov/study/NCT05103683	TRIO049	RECRUITING	This first-in-human study will evaluate the safety, tolerability, pharmacokinetics, and antitumor activity of TORL-1-23 in patients with advanced cancer	NO	Advanced Solid Tumor|Ovarian Cancer|Endometrial Cancer|NSCLC	DRUG: TORL-1-23	Incidence and severity of adverse events and serious adverse events, Incidence and severity of adverse events, serious adverse events, according to NCI-CTCAE Version 5.0, up to 2 years|Maximum Tolerated Dose (MTD), Highest administered dose with \< 33% participants experiencing dose limiting toxicity (DLT) in the first 6 DLT evaluable participants, 28 Days|Recommended Phase 2 Dose (RP2D), Based o…	Objective Response Rate (ORR), Percentage of participants with best response of complete response (CR) or partial response (PR) according to RECIST 1.1, up to 2 years|Duration of Response (DOR), Time from CR or PR to objective disease progression or death to any cause, up to 2 years|Progression Free Survival (PFS), PFS is defined as the time from the start of the treatment until objective disease…		TORL Biotherapeutics, LLC	Translational Research in Oncology	ALL	ADULT, OLDER_ADULT	PHASE1	90	INDUSTRY	INTERVENTIONAL	Allocation: NON_RANDOMIZED|Intervention Model: SEQUENTIAL|Masking: NONE|Primary Purpose: TREATMENT	TORL123-001	2021-11-17	2024-11-15	2025-11-15	2021-11-02		2024-04-17	UCLA - JCCC Clinical Research Unit, Los Angeles, California, 90095, United States|University of Minnesota, Minneapolis, Minnesota, 55455, United States|Mayo Clinic in Rochester, Rochester, Minnesota, 55905, United States|Cleveland Clinic, Cleveland, Ohio, 44195, United States
NCT05950945	Trastuzumab deruxtecan	ERBB2	Trastuzumab Deruxtecan (T-DXd) in Patients Who Have Hormone Receptor-negative and Hormone Receptor-positive HER2-low or HER2 IHC 0 Metastatic Breast Cancer	https://clinicaltrials.gov/study/NCT05950945		RECRUITING	This study will evaluate the safety and efficacy of trastuzumab deruxtecan (T-DXd) in participants with human epidermal growth factor receptor 2 (HER2)-low or HER2 immunohistochemistry (IHC) 0 (who are both hormone receptor \[HR\]-negative and HR-positive) unresectable and/or metastatic breast cancer.	NO	Breast Cancer	DRUG: Trastuzumab Deruxtecan	Time From the Start of T-DXd to Initiation of Subsequent Anticancer Treatment (TTNT), TTNT is defined as the time interval from the date of first dose of T-DXd to the initiation of the next anticancer treatment or death due to any cause., Until subsequent therapy or death, assessed up to 24 months	Real-World Progression Free Survival (PFS), Real-world PFS is defined as time from date of first dose of T-DXd to time of disease progression per investigator assessment based on Response Evaluation Criteria in Solid Tumors (RECIST) v1.1 or death due to any cause., Until progression or death, assessed up to 24 months|Time From Start of T-DXd to Discontinuation of T-DXd or Death (TTD), TTD is defi…		Daiichi Sankyo	AstraZeneca	ALL	ADULT, OLDER_ADULT	PHASE3	250	INDUSTRY	INTERVENTIONAL	Allocation: NON_RANDOMIZED|Intervention Model: PARALLEL|Masking: NONE|Primary Purpose: TREATMENT	DS8201-0001-CIS-MA|2023-505616-38-00	2023-12-30	2027-10-01	2027-10-01	2023-07-18		2024-07-05	Mount Sinai Medical Center, Miami Beach, Florida, 33140, United States|USF College of Medicine, Tampa, Florida, 33602, United States|Hospital Erasto Gaertner - Liga Paranaense de Combate ao Cancer, Curitiba, 81520-060, Brazil|CEPON - Centro de Pesquisas Oncológicas de Santa Catarina, Florianopolis, 88034-000, Brazil|Oncosite - Centro de Pesquisa Clinica e Oncologia, Ijuí, 98700-000, Brazil|Funda?…
NCT03219333	Enfortumab vedotin	Nectin-4	A Study of Enfortumab Vedotin for Patients With Locally Advanced or Metastatic Urothelial Bladder Cancer	https://clinicaltrials.gov/study/NCT03219333	EV-201	COMPLETED	This is a study that will test how an experimental drug (enfortumab vedotin) affects patients with cancer of the urinary system (urothelial cancer). This type of cancer includes cancer of the bladder, renal pelvis, ureter or urethra that has spread to nearby tissues or to other areas of the body. This clinical trial will enroll patients who were previously treated with a kind of anticancer drug c…	YES	Carcinoma, Transitional Cell|Urinary Bladder Neoplasms|Urologic Neoplasms|Renal Pelvis Neoplasms|Urothelial Cancer|Ureteral Neoplasms|Urethral Neoplasms	DRUG: Enfortumab vedotin	Objective Response Rate (ORR) Per Blinded Independent Central Review (BICR), The percentage of participants with confirmed complete response (CR) or partial response (PR) according to Response Evaluation Criteria in Solid Tumors version 1.1 (RECIST 1.1). CR is defined as disappearance of all target lesions and non-target lesions. Any pathological lymph nodes (whether target or non-target) must ha…	Duration of Objective Response (DOR) Per BICR, The time from first documentation of objective response (CR or PR that is subsequently confirmed) to the first documentation of progressive disease (PD) or to death due to any cause, whichever comes first. CR and PR are defined in ORR per BICR endpoint. PD was defined as at least a 20% increase in the sum of diameters of target lesions, taking as ref…		Astellas Pharma Inc	Seagen Inc.	ALL	ADULT, OLDER_ADULT	PHASE2	219	INDUSTRY	INTERVENTIONAL	Allocation: NA|Intervention Model: SINGLE_GROUP|Masking: NONE|Primary Purpose: TREATMENT	SGN22E-001	2017-10-08	2020-10-27	2023-07-28	2017-07-17	2021-12-17	2023-09-28	Alaska Urological Institute, Anchorage, Alaska, 99503, United States|Arizona Oncology Associates, PC - HAL, Goodyear, Arizona, 85395, United States|Mayo Clinic Arizona, Phoenix, Arizona, 85054, United States|Arizona Oncology Associates, PC - HOPE, Tucson, Arizona, 85710, United States|Keck Medical Center / University of Southern California, Los Angeles, California, 90033, United States|Keck Medic…	Study Protocol, https://cdn.clinicaltrials.gov/large-docs/33/NCT03219333/Prot_000.pdf|Statistical Analysis Plan, https://cdn.clinicaltrials.gov/large-docs/33/NCT03219333/SAP_001.pdf
NCT03734029	Trastuzumab deruxtecan	ERBB2	Trastuzumab Deruxtecan (DS-8201a) Versus Investigator's Choice for HER2-low Breast Cancer That Has Spread or Cannot be Surgically Removed [DESTINY-Breast04]	https://clinicaltrials.gov/study/NCT03734029		ACTIVE_NOT_RECRUITING	This study will compare DS-8201a to physician choice standard treatment. Participants must have HER2-low breast cancer that has been treated before. Participants' cancer: * Cannot be removed by an operation * Has spread to other parts of the body	YES	Breast Cancer	DRUG: Trastuzumab deruxtecan (DS-8201a)|DRUG: Capecitabine|DRUG: Eribulin|DRUG: Gemcitabine|DRUG: Paclitaxel|DRUG: Nab-paclitaxel	Progression-free Survival (PFS) Based on Blinded Independent Central Review (BICR) in the Hormone Receptor-Positive Cohort in Participants With HER2-low Breast Cancer, Progression-free survival (PFS), defined as at least a 20% increase in the sum of diameters of target lesions, was assessed from the date of randomization to the date of the first radiographic disease progression or death due to an…	Progression-free Survival (PFS) Based on Blinded Independent Central Review (BICR) in Participants With HER2-low Breast Cancer (All Patients) Regardless of Hormone Receptor Status, Progression-free survival (PFS), defined as at least a 20% increase in the sum of diameters of target lesions, was assessed from the date of randomization to the date of the first radiographic disease progression or de…	All-Cause Mortality, All-cause mortality is defined as all anticipated and unanticipated deaths due to any cause, with the number and frequency of such events by arm or comparison group of the clinical study., From the date of randomization up to the date of death due to any cause, up to approximately 3 years	Daiichi Sankyo	Daiichi Sankyo Co., Ltd.|AstraZeneca	ALL	ADULT, OLDER_ADULT	PHASE3	557	INDUSTRY	INTERVENTIONAL	Allocation: RANDOMIZED|Intervention Model: PARALLEL|Masking: NONE|Primary Purpose: TREATMENT	DS8201-A-U303|2018-003069-33|184223|DESTINY-B04	2018-12-27	2022-01-11	2025-10-01	2018-11-07	2023-06-15	2024-04-11	Ironwood Cancer & Research Centers - Chandler II, Chandler, Arizona, 85224, United States|Banner MD Anderson Cancer Center, Gilbert, Arizona, 85234-2165, United States|Cancer Treatment Centers of America at Western Regional Medical Center, Goodyear, Arizona, 85338, United States|UCLA School of Medicine, Los Angeles, California, 90095-1690, United States|Stanford Cancer Institute, Palo Alto, Calif…	Study Protocol and Statistical Analysis Plan, https://cdn.clinicaltrials.gov/large-docs/29/NCT03734029/Prot_SAP_000.pdf
NCT04843709	MRG004A	TF	A Study of MRG004A in Patients With Tissue Factor Positive Advanced or Metastatic Solid Tumors	https://clinicaltrials.gov/study/NCT04843709		RECRUITING	The objective of this study is to evaluate the safety, efficacy, pharmacokinetics, and immunogenicity of MRG004A in patients with Tissue Factor positive advanced or metastatic solid tumors.	NO	Advanced or Metastatic Solid Tumors	DRUG: MRG004A	Maximum Tolerated Dose (MTD), The highest dose confirmed wherein less than 2 out of 6, or \< 33% of evaluable patients in a treatment cohort experiences dose-limiting toxicity (DLT)., DLT will be evaluated during the first treatment cycle (Day 1-21)|Recommended Phase II Dose (RP2D), The dose level of MRG004A recommended for further clinical studies based on assessment of the safety, efficacy and …	Duration of Response (DoR), The time interval between the date of the earliest qualifying response and the date of disease progression or death for any cause, whichever occurs earlier., Baseline to study completion (up to 24 months)|Disease Control Rate (DCR), The proportion of patients who achieve CR, PR, or stable disease (SD) ≥ 6 weeks based on RECIST v1.1., Baseline to study completion (up to…		Shanghai Miracogen Inc.		ALL	ADULT, OLDER_ADULT	PHASE1|PHASE2	181	INDUSTRY	INTERVENTIONAL	Allocation: NA|Intervention Model: SINGLE_GROUP|Masking: NONE|Primary Purpose: TREATMENT	MRG004A-001	2021-07-26	2024-04-24	2024-06-25	2021-04-13		2022-09-08	Chao Family Comprehensive Cancer Center, Orange, California, 92868-3201, United States|Memorial Sloan Kettering 60th Street Outpatient Center, New York, New York, 10065, United States|Gabrail Cancer Center Research, Canton, Ohio, 44718, United States|The Christ Hospital Cancer Center, Cincinnati, Ohio, 45219, United States|Gettysburg Cancer Center, Gettysburg, Pennsylvania, 17325, United States|V…
NCT04795869	Brentuximab vedotin	CD30	Brentuximab Vedotin and Pembrolizumab in Treating Patients With Recurrent Peripheral T-Cell Lymphoma	https://clinicaltrials.gov/study/NCT04795869		WITHDRAWN	This phase II clinical trial studies how well giving brentuximab vedotin together with pembrolizumab in treating patients with peripheral T-cell lymphoma (PTCL) that has come back (recurrent). Monoclonal antibody-drug conjugates, such as brentuximab vedotin, can block cancer growth in different ways by targeting certain cells. Pembrolizumab is an antibody-drug that stimulates body's natural antit…	NO	Recurrent Angioimmunoblastic T-Cell Lymphoma|Recurrent Enteropathy-Associated T-Cell Lymphoma|Recurrent Follicular T-Cell Lymphoma|Recurrent Hepatosplenic T-Cell Lymphoma|Recurrent Nodal Peripheral T-Cell Lymphoma With TFH Phenotype|Recurrent Peripheral T-Cell Lymphoma, Not Otherwise Specified|Recurrent Subcutaneous Panniculitis-Like T-Cell Lymphoma|Refractory Angioimmunoblastic T-Cell Lymphoma|R…	DRUG: Brentuximab Vedotin|BIOLOGICAL: Pembrolizumab	Overall objective response rate (ORR), Defined as the proportion of evaluable patients who experience an objective response (complete response \[CR\] or partial response \[PR\]) per Lugano Criteria., Up to 5 years	Incidence of adverse events, Assessed by National Cancer Institute Common Terminology Criteria for Adverse Events 5.0, 30 days after end of treatment|Duration of objective response (DOR), Will be summarized by a median and IQR. For DOR analysis, disease progression is defined as progressive disease (PD) per Lugano criteria, other documented clinical or radiographical progression per physician jud…		Northwestern University	National Cancer Institute (NCI)|Merck Sharp & Dohme LLC|Seagen Inc.	ALL	ADULT, OLDER_ADULT	PHASE2	0	OTHER	INTERVENTIONAL	Allocation: NA|Intervention Model: SINGLE_GROUP|Masking: NONE|Primary Purpose: TREATMENT	NU 20H02|NCI-2021-01232|STU00213618|NU 20H02|P30CA060553	2020-03-01	2026-03-15	2024-03-29	2021-03-12		2023-10-10	Northwestern University, Chicago, Illinois, 60611, United States
NCT02500914	SC-002	DLL3	SC-002 in Small Cell Lung Cancer and Large Cell Neuroendocrine Carcinoma	https://clinicaltrials.gov/study/NCT02500914		TERMINATED	This is a Phase 1a/1b study of SC-002 in patients with relapsed small cell lung cancer (SCLC) or large cell neuroendocrine carcinoma (LCNEC). SC-002 is an antibody-drug conjugate (ADC) comprised of a monoclonal antibody linked to a potent chemotherapy. The purpose of this study is to assess the safety and tolerability of SC-002 at different dose levels, to determine the highest dose of SC-002 tha…	NO	Small Cell Lung Cancer	DRUG: SC-002	Maximum tolerated dose, 6 months|Number of subjects with adverse events as a measure of safety and tolerability, 6 months	Pharmacokinetics of SC-002, Standard PK variables to be assessed include AUC, Tmax, Cmax, Ctrough, T1/2, CL, Vss, Cycle 1 and 4: days 1, 2, 4, 8, 15; Cycles 2, 3, and 5: day 1 only|RECIST v1.1 assessed objective response rate, 6 months		Stemcentrx		ALL	ADULT, OLDER_ADULT	PHASE1	35	INDUSTRY	INTERVENTIONAL	Allocation: NA|Intervention Model: SINGLE_GROUP|Masking: NONE|Primary Purpose: TREATMENT	SCRX002-001	2024-06-15	2018-08-23	2018-08-23	2015-07-17		2018-10-05	Ann Arbor, Michigan, 48109, United States|Saint Louis, Missouri, 63110, United States|New York, New York, 10065, United States|Nashville, Tennessee, 37203, United States
NCT06036121	ADRX-0706	Nectin-4	A Study of ADRX-0706 in Select Advanced Solid Tumors	https://clinicaltrials.gov/study/NCT06036121		RECRUITING	The primary purpose of this study is to assess the safety, tolerability, and pharmacokinetics, and to identify the optimal dose of ADRX-0706 in patients with select advanced solid tumors.	NO	Solid Tumors	DRUG: ADRX-0706	Incidence of adverse events, Until study completion (estimated 3 years)	Measurement of maximum plasma concentration (Cmax) of ADRX-0706, Measured from pharmacokinetic (PK) blood samples, Until study completion (estimated 3 years)|Measurement of trough concentration (Ctrough) of ADRX-0706, Measured from PK blood samples, Until study completion (estimated 3 years)|Measurement of area under the serum concentration-time curve (AUC) of ADRX-0706, Measured from PK blood sa…		Adcentrx Therapeutics		ALL	ADULT, OLDER_ADULT	PHASE1	114	INDUSTRY	INTERVENTIONAL	Allocation: NON_RANDOMIZED|Intervention Model: SEQUENTIAL|Masking: NONE|Primary Purpose: TREATMENT	ADRX-0706-001	2023-09-26	2024-09-25	2024-12-26	2023-09-13		2024-02-07	USC Norris Comprehensive Cancer Center, Los Angeles, California, 90033, United States|UCLA, Los Angeles, California, 90404, United States|START Midwest, Grand Rapids, Michigan, 49546, United States|University of Texas MD Anderson Cancer Center, Houston, Texas, 77030, United States|START San Antonio, San Antonio, Texas, 78229, United States|START Mountain Region, West Valley City, Utah, 84119, Uni…
NCT06210815	HLX42	EGFR	A Study of HLX42 in Advanced/Metastatic Solid Tumors	https://clinicaltrials.gov/study/NCT06210815		RECRUITING	This study is an open-label first-in-human phase I clinical study to evaluate the safety and tolerability of HLX42.	NO	Solid Tumor	DRUG: HLX42	The Dose-Limiting Toxicity (DLT) of HLX42 within 21 days after the first Administration, DLT refers to the AEs that are determined to be related to the investigational product by the investigator, whose severity will affect the escalation of dose level. In this study, the DLT observation period lasts for 21 days after the first administration of HLX42., From first dose to the end of Cycle 1 (each…	Objective response rate (ORR), Percentage of participants with complete response (CR) and partial response (PR) based on investigator assessment., approximately up to 24 months|Duration of response (DOR), Length of time response continued based on investigator's assessment., approximately up to 24 months.|Progression-free survival (PFS), The PFS is defined as the time from the date of enrollment …		Shanghai Henlius Biotech		ALL	ADULT, OLDER_ADULT	PHASE1	42	INDUSTRY	INTERVENTIONAL	Allocation: NA|Intervention Model: SINGLE_GROUP|Masking: NONE|Primary Purpose: TREATMENT	HLX42-FIH101	2024-03-14	2026-04-01	2026-07-01	2024-01-18		2024-04-17	Guangdong Provincial People's Hospital, Guangdong, Guangzhou, China
NCT06364410	deruxtecan	ERBB2	Testing the Combination of the Anticancer Drugs Trastuzumab Deruxtecan (DS-8201a) and Azenosertib (ZN-c3) in Patients With Stomach or Other Solid Tumors	https://clinicaltrials.gov/study/NCT06364410		NOT_YET_RECRUITING	This phase I trial tests the safety, side effects, and best dose of azenosertib in combination with trastuzumab deruxtecan in treating patients with HER2-positive and cyclin E amplified gastric or gastroesophageal junction cancer and other HER2-positive solid tumors that have spread to nearby tissue or lymph nodes (locally advanced), that have spread from where it first started (primary site) to …	NO	Clinical Stage III Gastric Cancer AJCC v8|Clinical Stage III Gastroesophageal Junction Adenocarcinoma AJCC v8|Clinical Stage IV Gastric Cancer AJCC v8|Clinical Stage IV Gastroesophageal Junction Adenocarcinoma AJCC v8|Locally Advanced Gastric Carcinoma|Locally Advanced Gastroesophageal Junction Adenocarcinoma|Locally Advanced Malignant Solid Neoplasm|Metastatic Gastric Carcinoma|Metastatic Gastro…	DRUG: Azenosertib|PROCEDURE: Biopsy|PROCEDURE: Biospecimen Collection|PROCEDURE: Computed Tomography|PROCEDURE: Echocardiography|PROCEDURE: Magnetic Resonance Imaging|PROCEDURE: Multigated Acquisition Scan|BIOLOGICAL: Trastuzumab Deruxtecan	Maximum tolerated dose, A Bayesian optimal interval design will be used to determine the maximum tolerated dose of the T-DXd (DS-8201a) and azenosertib (ZN-c3) combination., Up to completion of dose-escalation|Recommended phase 2 dose, Up to completion of dose-escalation|Incidence of dose limiting toxicities (DLTs), DLTs will be defined as the below based on the National Cancer Institute Common T…	Objective response rate (ORR), ORR will be the percentage of patients with complete response (CR) or partial response (PR), as assessed by Response Evaluation Criteria in Solid Tumors (RECIST) version 1.1. ORR will be estimated with a 95% CIs., Up to 3 years|Progression free survival (PFS), Disease progression will be assessed by RECIST version 1.1. PFS will be estimated using the product-limit e…		National Cancer Institute (NCI)		ALL	ADULT, OLDER_ADULT	PHASE1	48	NIH	INTERVENTIONAL	Allocation: NON_RANDOMIZED|Intervention Model: SEQUENTIAL|Masking: NONE|Primary Purpose: TREATMENT	NCI-2024-02982|NCI-2024-02982|10554|10554|UM1CA186688	2024-08-30	2026-03-31	2026-03-31	2024-04-15		2024-06-05
NCT04724018	Sacituzumab Govitecan;Enfortumab vedotin-ejfv	TROP2;Nectin-4	Sacituzumab Govitecan Plus EV in Metastatic UC	https://clinicaltrials.gov/study/NCT04724018		ACTIVE_NOT_RECRUITING	This research study will assess what doses of Sacituzumab Govitecan and Enfortumab Vedotin can be safely combined in the treatment of metastatic urothelial carcinoma (mUC). The names of the study drugs in this investigational combination are: * Enfortumab Vedotin * Sacituzumab Govitecan	NO	Urothelial Cancer|Metastatic Urothelial Carcinoma|Metastatic Urothelial Carcinoma of the Renal Pelvis and Ureter|Bladder Cancer	DRUG: Sacituzumab Govitecan (SG)|DRUG: Enfortumab vedotin-ejfv (EV)	Maximum Tolerated Dose (MTD) of Sacituzumab Govitecan (SG) and Enfortumab vedotin-ejfv (EV) in Combination, The Maximum Tolerated Dose (MTD) in mg of Sacituzumab Govitecan (SG) and Enfortumab vedotin-ejfv (EV) in Combination is assessed., 21 days|Dose-limiting toxicity (DLT) of Sacituzumab Govitecan (SG) and Enfortumab Vedotin in combination, Treatment-Related Adverse Events are assessed by CTCAE…	Objective response rate (ORR), Assessed by Response Evaluation Criteria in Solid Tumors (RECIST) Version 1.1, 21 days|Rate of Complete Responses (CR), Assessed by Response Evaluation Criteria in Solid Tumors (RECIST) Version 1.1, 21 days|Rate of Partial responses (PR), Assessed by Response Evaluation Criteria in Solid Tumors (RECIST) Version 1.1, 21 days|Rate of participants with progressive dise…		Dana-Farber Cancer Institute	Gilead Sciences	ALL	ADULT, OLDER_ADULT	PHASE1	24	OTHER	INTERVENTIONAL	Allocation: NA|Intervention Model: SINGLE_GROUP|Masking: NONE|Primary Purpose: TREATMENT	20-614	2021-05-20	2025-10-01	2026-05-01	2021-01-26		2023-11-07	Dana Farber Cancer Institute, Boston, Massachusetts, 02215, United States
NCT05527184	IMGN151	FOLR1	First in Human Study of IMGN151 in Recurrent Endometrial Cancer and Recurrent, High-grade Serous Epithelial Ovarian, Primary Peritoneal, or Fallopian Tube Cancers	https://clinicaltrials.gov/study/NCT05527184		RECRUITING	IMGN151-1001 is a Phase 1, first in human, open-label dose-escalation and expansion study in adult patients with recurrent endometrial cancer, recurrent, high-grade serous epithelial ovarian, primary peritoneal, or fallopian tube cancers.	NO	Endometrial Cancer|High Grade Serous Adenocarcinoma of Ovary|Primary Peritoneal Carcinoma|Fallopian Tube Cancer	DRUG: IMGN151	Characterize Safety (Escalation), Incidence of adverse events (AE), serious adverse events (SAEs), and DLTs, Up to 1 year|Define Recommended Phase 2 Dose (Escalation), Definition of RP2D, Up to 1 year|Determine Objective Response Rate (Expansion), ORR (which includes best response of CR or PR as assessed by the investigator), Up to 3 years	During dose escalation and expansion to characterize study drug concentration, Study drug concentration, There are 9 blood draw collection time points at Cycles 1 and 3, 3 blood draw time points at Cycles 2,4,5 and 6, and collection at every 3 cycles after cycle 6 until end of study (approximately up to 2 years). Each cycle is 21 days.|During dose escalation and expansion to measure the concentra…	Determine Progression Free Survival (Escalation), PFS (defined as the time from first dose of IMGN151 until investigator-assessed radiological PD or death, whichever occurs first), Up to 1 year	ImmunoGen, Inc.		FEMALE	ADULT, OLDER_ADULT	PHASE1	227	INDUSTRY	INTERVENTIONAL	Allocation: NA|Intervention Model: SEQUENTIAL|Masking: NONE|Primary Purpose: TREATMENT	IMGN151-1001	2023-01-11	2024-06-30	2025-12-30	2022-09-02		2024-02-28	UCLA, Los Angeles, California, 90095, United States|University of Colorado Anschutz Cancer Pavilion, Aurora, Colorado, 80045, United States|Florida Cancer Specialists, Sarasota, Florida, 34232, United States|OU Health Stephenson Cancer Center, Oklahoma City, Oklahoma, 73104, United States|Tennessee Oncology Nashville, Nashville, Tennessee, 37203, United States|MD Anderson Cancer Center, Houston, …
NCT04251416	Sacituzumab Govitecan	TROP2	A Study of Sacituzumab Govitecan (IMMU-132) in Endometrial Carcinoma	https://clinicaltrials.gov/study/NCT04251416		RECRUITING	This is a non-randomized Phase 2 study of sacituzumab govitecan (IMMU-132) in subjects with persistent or recurrent endometrial carcinoma.	NO	Endometrial Carcinoma	DRUG: Sacituzumab Govitecan	Objective Response Rate (ORR), Objective response rate (complete response and partial response rates) by RECIST1.1 criteria in patients with persistent or recurrent endometrial carcinoma (EC), 4 Years	Duration of overall survival (OS), Overall survival is defined as the duration of time from study entry to death or the date of last contact., 6 Years|Duration of progression free survival (PFS), Progression free survival is defined as the duration of time from study entry to time of progression, death, or is censored at date of last disease assessment, 6 Years|Durable disease control rate (DDCR)…		Yale University	Gilead Sciences	FEMALE	ADULT, OLDER_ADULT	PHASE2	50	OTHER	INTERVENTIONAL	Allocation: NA|Intervention Model: SINGLE_GROUP|Masking: NONE|Primary Purpose: TREATMENT	2000026850	2020-03-17	2024-12-24	2024-02-26	2020-01-31		2024-05-24	Smilow Cancer Hospital at Yale New Haven, New Haven, Connecticut, 06510, United States
NCT04925284	XB002	TF	Study of XB002 in Subjects With Solid Tumors (JEWEL-101)	https://clinicaltrials.gov/study/NCT04925284		RECRUITING	This is a Phase 1, open-label, multicenter, dose-escalation and expansion study evaluating the safety, tolerability, PK, pharmacodynamics, and clinical antitumor activity of XB002 administered IV q3w alone and in combination with nivolumab to subjects with advanced solid tumors.	NO	Non Small Cell Lung Cancer|Cervical Cancer|SCCHN|Pancreatic Cancer|Esophageal SCC|Metastatic Castration-resistant Prostate Cancer|Triple Negative Breast Cancer|Hormone Receptor-positive Breast Cancer|Epithelial Ovarian Cancer|Endometrial Cancer|Tissue Factor-Expressing Solid Tumors	DRUG: XB002|DRUG: Nivolumab	Dose-Escalation Stage: MTD/recommended dose for XB002, To determine the MTD and/or RD for further evaluation of IV administration of XB002 alone and in combination therapy in subjects with advanced malignancies, 18 months|Cohort-Expansion Stage: Objective Response Rate (ORR), To evaluate preliminary efficacy of XB002 when administered alone and in combination therapy by determining the ORR per RE…	Safety of XB002: Adverse Events, To evaluate the safety of XB002 through the evaluation of incidence and severity of nonserious adverse events (AEs) and serious adverse events (SAEs), 30 months|Tolerability of XB002 as evaluated by the duration of exposure for the study, To evaluate the tolerability of XB002 through the evaluation of duration of exposure for the study treatment, 30 months|Tolerab…		Exelixis		ALL	ADULT, OLDER_ADULT	PHASE1	573	INDUSTRY	INTERVENTIONAL	Allocation: RANDOMIZED|Intervention Model: SEQUENTIAL|Masking: NONE|Primary Purpose: TREATMENT	XB002-101	2021-06-07	2024-06-07	2024-10-07	2021-06-14		2024-05-03	Exelixis Clinical Site #48, Birmingham, Alabama, 35294, United States|Exelixis Clinical Site #20, Tucson, Arizona, 85704, United States|Exelixis Clinical Site#58, Little Rock, Arkansas, 72205, United States|Exelixis Clinical Site#59, Fountain Valley, California, 92708, United States|Exelixis Clinical Site #21, Los Angeles, California, 90025, United States|Exelixis Clinical Site #26, Los Angeles, …
NCT04940325	Datopotamab Deruxtecan	TROP2	Datopotamab (DS-1062a) in Advanced and/or Unresectable Non-Small Cell Lung Cancer	https://clinicaltrials.gov/study/NCT04940325	ICARUS-LUNG01	RECRUITING	This study aims to evaluate the efficacy and safety of DS-1062a in participants with metastatic, unresectable NSCLC having progressed on one, but not more than three previous standard therapies. Moreover, the immune effects, the predictors of resistance and response to treatment, the effect of the chemotherapy on deoxyribonucleic acid (DNA) replication will be assessed and will help identify the …	NO	Metastatic Lung Cancer	DRUG: DS-1062a	Evaluation of objective response rate (ORR), ORR is defined as the proportion of participants who achieved a confirmed complete response (CR) or partial response (PR) observed on treatment and assessed by investigators, During treatment period, an average of 4 months	Evaluation of duration of response (DoR), Defined as the time from the first documented CR or PR until the date of disease progression, or until the date of death, From cycle 2 (Week 3) up to 3 years after the EoT, an average of 39 months]|Evaluation of progression free Survival (PFS), Defined as the time date of the first dose until progression or death from any cause, whichever occurs first, Fr…	To assess physical functioning sub-scale score of the European Organization for Research and Treatment of Cancer quality of life questionnaire (EORTC QLQ-C30) based on a scale from 1 to 4, where higher scores mean worse outcome, During treatment (Cycles 1, 2, 3 and then every 2 cycles), at EoT and then up to 3 years after EoT, an average of 40 months]|To assess global health sub-scale score of th…	Gustave Roussy, Cancer Campus, Grand Paris	Daiichi Sankyo	ALL	ADULT, OLDER_ADULT	PHASE2	100	OTHER	INTERVENTIONAL	Allocation: NA|Intervention Model: SINGLE_GROUP|Masking: NONE|Primary Purpose: TREATMENT	2020-005723-37|2020/3187	2021-05-12	2022-11-12	2025-11-12	2021-06-25		2021-06-25	Gustave Roussy, Villejuif, 94805, France
NCT01620229	Brentuximab vedotin	CD30	Brentuximab Vedotin After Donor Stem Cell Transplant in Treating Patients With Hematologic Malignancies	https://clinicaltrials.gov/study/NCT01620229		WITHDRAWN	This phase I/II trial studies the side effects and best way to give brentuximab vedotin and to see how well it works after donor stem cell transplant in treating patients with hematologic malignancies. Monoclonal antibodies, such as brentuximab vedotin, can block cancer growth in different ways. Some block the ability of cancer to grow and spread. Others find cancer cells and help kill them or ca…	NO	Hematopoietic/Lymphoid Cancer	DRUG: brentuximab vedotin|OTHER: laboratory biomarker analysis|OTHER: pharmacological study	Incidence of durable hematopoietic engraftment defined as the achievement of > 50% donor CD3+ cell chimerism, Evaluated according to the allogeneic transplant protocol on which patients are co-enrolled, or according to institutional standard practice if no monitoring scheme is specified in the transplant protocol., At day 84 after HCT	Rates of relapse, Response criteria will be based on the 2007 revisions to the International Working Group criteria for malignant lymphoma., Up to 5 years|Non-relapse mortality, Response criteria will be based on the 2007 revisions to the International Working Group criteria for malignant lymphoma., Up to 5 years|Incidence of acute GVHD, Up to 5 years|Peak grade of acute GVHD, Up to 5 years|Incid…		Fred Hutchinson Cancer Center	Seagen Inc.|National Cancer Institute (NCI)	ALL	CHILD, ADULT, OLDER_ADULT	PHASE1|PHASE2	0	OTHER	INTERVENTIONAL	Allocation: NA|Intervention Model: SINGLE_GROUP|Masking: NONE|Primary Purpose: TREATMENT	2560.00|NCI-2012-00924|2560.00|P30CA015704|P01CA018029	2024-06-13	2024-04-14		2012-06-15		2014-04-21	Fred Hutchinson Cancer Research Center/University of Washington Cancer Consortium, Seattle, Washington, 98109, United States
NCT03523572	Trastuzumab deruxtecan	ERBB2	Trastuzumab Deruxtecan With Nivolumab in Advanced Breast and Urothelial Cancer	https://clinicaltrials.gov/study/NCT03523572		UNKNOWN	This is a study of trastuzumab deruxtecan, which was approved by the FDA (in December 2019) for the treatment of HER2-positive unresectable or metastatic breast cancer following two or more prior anti-HER2 based regimens. Participants will receive this study drug along with a cancer drug, an immune checkpoint inhibitor, anti-PD1, called nivolumab. The study will be done in two parts: * Part 1 is …	NO	Breast Cancer|Urothelial Carcinoma	DRUG: Trastuzumab deruxtecan|DRUG: Nivolumab	Part 1: Number of participants with dose-limiting toxicity at each dose level, Categories: Low Dose, High Dose, 2 cycles (within 2 months; each cycle is 21 days)|Part 2: Dose expansion - Objective response rate (ORR) as assessed by Central Imaging Review, ORR is defined as the percentage of participants with tumor size reduction of a predefined amount and for a minimum time period. ORR includes p…	Duration of Response (DoR), within 24 months|Disease Control Rate (DCR), within 24 months|Progression Free Survival (PFS), PFS is defined as the time from randomization until objective tumor progression or death, whichever occurs first., within 24 months|Time to Response based on central review, within 24 months|Overall Survival (OS), Overall survival is defined as the time from randomization unt…		Daiichi Sankyo	Bristol-Myers Squibb|AstraZeneca	ALL	ADULT, OLDER_ADULT	PHASE1	99	INDUSTRY	INTERVENTIONAL	Allocation: NON_RANDOMIZED|Intervention Model: SEQUENTIAL|Masking: NONE|Primary Purpose: TREATMENT	DS8201-A-U105|2018-000371-32	2018-06-20	2021-07-22	2024-07-22	2018-05-14		2021-08-12	UCLA - Medical Center, Santa Monica, California, 90404-2125, United States|Yale University, New Haven, Connecticut, 06520, United States|University of Miami Hospital & Clinics/Sylvester Comprehensive Cancer Center, Miami, Florida, 33136, United States|Norton Cancer Institute, Louisville, Kentucky, 40202-3700, United States|Icahn School of Medicine at Mount Sinai, New York, New York, 10029-6504, U…
NCT03473691	Glembatumumab Vedotin	GPNMB	Pilot Study of Glembatumumab Vedotin Following Doxorubicin and Cytoxan as Neo-adjuvant Therapy in Gp-NMB-expressing High Risk Triple Negative Breast Cancer	https://clinicaltrials.gov/study/NCT03473691	Breast50	WITHDRAWN	This is a single arm, pilot study assessing safety/feasibility and efficacy of neo-adjuvant glembatumumab vedotin (GV) in patients with high risk triple negative breast cancer (TNBC) with glycoprotein-NMB (gpNMB) expression ≥ 25%. Primary endpoints will be safety/feasibility, and secondary endpoints will be rates of pathologic complete response (pCR), and measurements of growth differentiation fa…	NO	Triple Negative Breast Cancer	DRUG: Glembatumumab Vedotin	Incidence of Adverse Events (AEs), Adverse events will be assessed using the Common Terminology Criteria for Adverse Events (CTCAE) version 4.03, Adverse events will be assessed from the time of consent through 30 days after participants complete GV treatment (unless study treatment is stopped for safety or investigator or participant decision, study treatment will last 25-28 weeks)|Proportion of…	Efficacy, Rates of pathologic complete response (pCR) following GV therapy, 3-6 weeks after last GV infusion for each patient|Growth Differentiation Factor-11 (GDF11) expression in the tumor, GDF11 expression by immunohistochemistry prior to and following doxorubicin/cyclophosphamide and GV therapy, Prior to therapy (in the 28 days prior to starting study treatment) and 3-6 weeks after last GV in…	Peripheral circulating CD8 and CD4 T cell ratio, Blood will be collected in order to assess the proportions of CD8 and CD4 t cells., Prior to therapy (in the 28 days prior to starting study treatment) and at the last treatment with GV (about 22 weeks after starting study treatment).	University of Virginia	Celldex Therapeutics	ALL	ADULT, OLDER_ADULT	EARLY_PHASE1	0	OTHER	INTERVENTIONAL	Allocation: NA|Intervention Model: SINGLE_GROUP|Masking: NONE|Primary Purpose: TREATMENT	TBDBreast50	2018-05-01	2018-05-01	2018-05-01	2018-03-22		2018-06-01
NCT04886986	225Ac-J591	PSMA	Phase I/II 225Ac-J591 Plus 177Lu-PSMA-I&T for Progressive Metastatic Castration Resistant Prostate Cancer	https://clinicaltrials.gov/study/NCT04886986		SUSPENDED	This is a phase I/II dose-escalation study of 225Ac-J591 administered together with 177Lu-PSMA-I\&T (also known as PNT2002). The two study drugs are 225Ac-J591 and 177Lu-PSMA-I\&T. Both drugs are designed to deliver radiation to prostate cancer cells; they are known as radionuclide conjugates (radiation linked to antibodies/molecules that recognize prostate cancer cells). The first phase of the s…	NO	Prostate Cancer	DRUG: 225Ac-J591|DRUG: 177Lu-PSMA-I&T|DRUG: 68Ga-PSMA-11	Proportion of subjects with dose limiting toxicity (DLT) of 225Ac-J591 and 177Lu-PSMA-I&T during dose-escalation phase., DLTs will be measured by utilizing the Common Terminology Criteria for Adverse Events (CTCAE) version 5.0., Will be collected at the time of visit 1 through end of study or 100 months|Cumulative maximum tolerated dose (MTD) and recommended phase II dose 225Ac-J591 and 177Lu-PSM…	Change in biochemical progression-free survival, PSA progression will be defined as a rise of \> 25% above either the pretreatment level or the nadir PSA level (whichever is lowest). PSA must increase by \> 2 ng/ml to be considered progression., Will be collected at the time of visit 1 through end of study or 100 months|Change in circulating tumor cells (CTC) count, CTCs will be analyzed through …		Weill Medical College of Cornell University		MALE	ADULT, OLDER_ADULT	PHASE1|PHASE2	48	OTHER	INTERVENTIONAL	Allocation: NA|Intervention Model: SINGLE_GROUP|Masking: NONE|Primary Purpose: TREATMENT	20-08022486	2021-06-30	2024-12-24	2027-12-27	2021-05-14		2023-08-21	Brooklyn Methodist Hospital - New York Presbyterian, Brooklyn, New York, 11215, United States|Weill Cornell Medicine New York Presbyterian, New York, New York, 10065, United States
NCT05123482	AZD8205	B7-H4	A Phase I/IIa Study of AZD8205 Given Alone or in Combination With Anticancer Drugs, in Participants With Advanced or Metastatic Solid Malignancies	https://clinicaltrials.gov/study/NCT05123482		RECRUITING	This research study is studying a new compound, AZD8205, as a possible treatment for advanced or metastatic solid tumours alone or in combination with anti-cancer agents	NO	Breast Cancer|Biliary Tract Carcinoma|Ovarian Cancer|Endometrial Cancer	DRUG: AZD8205|DRUG: AZD8205 and AZD2936 (Rilvegostomig)	The number of patients with adverse events, Number of patients with adverse events by system organ class and preferred term, From time of Informed consent to 30 days post last dose (approximately 1 year).|The number of patients with serious adverse events, Number of patients with serious adverse events by system organ class and preferred term, From time of Informed consent to 30 days post last do…	Objective Response Rate (ORR), The percentage of patients with a confirmed investigator assessed complete or partial response according to response criteria in solid tumours (RECIST 1.1)., From first dose of AZD8205 to progressive disease or death in the absence of disease progression ( approx. 2 years )|Duration of response (DoR), The time from the date of first response until date of disease pr…		AstraZeneca		ALL	ADULT, OLDER_ADULT	PHASE1|PHASE2	340	INDUSTRY	INTERVENTIONAL	Allocation: RANDOMIZED|Intervention Model: SEQUENTIAL|Masking: NONE|Primary Purpose: TREATMENT	D6900C00001|2021-000736-66	2021-10-18	2025-12-30	2025-12-30	2021-11-17		2024-06-11	Research Site, Duarte, California, 91010, United States|Research Site, Irvine, California, 92618, United States|Research Site, Santa Monica, California, 90404, United States|Research Site, Santa Rosa, California, 95403, United States|Research Site, Sarasota, Florida, 34232, United States|Research Site, Shreveport, Louisiana, 71103, United States|Research Site, Baltimore, Maryland, 21231, United S…
[truncated: 451 more rows]

## Sheet: ADC名称
ADC(终)				TQB2102	4
Brentuximab vedotin	78			Glofitamab	3
Trastuzumab deruxtecan	29			Mosunetuzumab	3
Sacituzumab Govitecan	24			Blinatumomab	3
Gemtuzumab Ozogamicin	21			M1231	1
Trastuzumab emtansine	20			REGN5093-M114	1
Disitamab vedotin	19			CD30 biAb-AATC	1
Belantamab mafodotin	15			CBP-1008	1
Enfortumab vedotin	13			AZD9592	1
Mirvetuximab Soravtansine	13			Zanidatamab	1
Polatuzumab Vedotin	12			etrumadenant (AB928)	1
MRG002	11			Cevostamab	1
Inotuzumab Ozogamicin	10			EBC-129	1
Datopotamab Deruxtecan	9
Loncastuximab Tesirine	9			BDC-1001	1
Anetumab ravtansine	8			NJH395
MRG003	8			SBT6050	1
Patritumab Deruxtecan	7			CX-2029	1
HS-20093	7			CX-2009	1
Glembatumumab Vedotin	6
Trastuzumab Duocarmazine	5
ARX788	5
STI-6129	5
Tisotumab Vedotin	5
vadastuximab talirine	5
Luveltamab Tazevibulin	4
BAY 2701439	4
TQB2102	4
Camidanlumab tesirine	4
Rovalpituzumab tesirine	4
Denintuzumab mafodotin	4
SHR-A1811	3
PSMA ADC	3
HS-20089	3
Upifitamab Rilsodotin	3
Labetuzumab govitecan	3
FOR46	3
Ifinatamab deruxtecan	3
Indusatumab vedotin	3
Coltuximab ravtansine	3
Panitumumab-IRDye800	3
Glofitamab	3
Mosunetuzumab	3
Blinatumomab	3
Depatuxizumab mafodotin	3
SGN-15	2
OBT076	2
FDA022-BB05	2
AGS67E	2
Telisotuzumab vedotin	2
9MW2821	2
STRO-001	2
MLN2704	2
vobramitamab duocarmazine	2
7MW3711	2
MORAb-202	2
BDC-1001	2
pembrolizumab	2
GQ1001	2
225Ac-J591	2
RC118	2
BL22 immunotoxin	2
Ozuriftamab Vedotin	2
Mecbotamab Vedotin	2
A166	2
Vorsetuzumab mafodotin	2
[truncated: 210 more rows]

## Sheet: 研究状态
Study Status研究状态
[truncated: 11 more rows]

[truncated: 2 more sheets: 研究阶段, 靶点数目]
